# Supplementary material for: SWIFT-Review: a text-mining workbench for systematic review
Source: Syst Rev. 2016 May 23;5:87. doi: 10.1186/s13643-016-0263-z (PMC4877757; doi:10.1186/s13643-016-0263-z)
Supplement: Additional file 2: — CAMARADES dataset. (XLSX 17704 kb) [file 13643_2016_263_MOESM2_ESM.xlsx]

## Sheet: Neuropain
Title	Abstract	Label
Osteolytic tumor-induced primary hyperalgesia in the mouse hindpaw	- In a recent survey of cancer pain classifications, nociceptive-tumor pain in somatic tissues occurs in the following manner: bone and joint (41.7%), muscle and soft tissue infiltration (28.3%) (Caraceni and Portenoy, Pain 82: 263-274). In particular tum	Excluded
(-)-(1R,2R)-3-(3-Dimethylamino-1-ethyl-2-methyl-propyl)-phenol hydrochloride (Tapentadol HCl): a novel mu-opioid receptor agonist norepinephrine Reuptake inhibitor with broad-spectrum analgesic properties	(-)-(1R, 2R)-3-(3-Dimethylamino-1-ethyl-2-methyl-propyl)-phenol hydrochloride (tapentadol HCl) is a novel mu-opioid receptor (MOR) agonist (K-i = 0.1 mu M; relative efficacy compared with morphine 88% in a [S-35] guanosine 5 '-3-O-(thio) triphosphate binding assay) and NE reuptake inhibitor (K-i = 0.5 mu M for synaptosomal reuptake inhibition). In vivo intracerebral microdialysis showed that tape…	Excluded
Suppression of acute herpetic pain-related responses by the kappa-opioid receptor agonist (-)-17-cyclopropylmethyl-3,14 beta-dihydroxy-4,5 alpha-epoxy-6 beta-[N-methyl-3-trans-3-(3-furyl) acrylamido] morphinan hydrochloride (TRK-820) in mice	(-)-17-Cyclopropylmethyl-3,14beta-dihydroxy-4,5alpha-epoxy-6beta-[N-methyl-3-trans-3-(3-furyl) acrylamido] morphinan hydrochloride (TRK-820) is a kappa-opioid receptor agonist that has pharmacological characteristics different from typical kappa-opioid receptor agonists. This study was conducted to determine the antiallodynic and antihyperalgesic effects of TRK-820 in a mouse model of acute herpe…	Included
Modification of nociception and morphine tolerance by the selective opiate receptor-like orphan receptor antagonist (-)-cis-1-methyl-7-[[4-(2,6-dichlorophenyl)piperidin-1-yl]methyl]-6,7,8,9-tetrahy dro-5H-benzocyclohepten-5-ol (SB-612111)	(-)-cis-1-Methyl-7-[[4-(2,6-dichlorophenyl)piperidin-1-yl]methyl]-6,7,8,9-tetrahy dro-5H-benzocyclohepten-5-ol (SB-612111) is a novel human opiate receptor-like orphan receptor (ORL-1) antagonist that has high affinity for the clonal human ORL-1 receptor (hORL-1 K(i) = 0.33 nM), selectivity versus mu-(174-fold), delta-(6391-fold), and kappa (486-fold)-opioid receptors and is able to inhibit nocic…	Excluded
Effects of EGCG on voltage-gated sodium channels in primary cultures of rat hippocampal CA1 neurons	(-)-Epigallocatechin-3-gallate (EGCG), the main active component of green tea, is commonly known for its beneficial properties at low doses. On the other hand, little is known about the adverse effects of EGCG. Voltage-gated sodium channel (VGSC) is responsible for both initiation and propagation of action potentials of the neurons in the hippocampus and throughout the central nervous system (CNS…	Excluded
Evidence for the involvement of ionotropic glutamatergic receptors on the antinociceptive effect of (-)-linalool in mice	(-)-Linalool is a monoterpene alcohol which is present in the essential oils of several aromatic plants. Recent studies suggest that (-)-linalool has anti-inflammatory, antihyperalgesic and antinociceptive properties in different animal models. The present study investigated the contribution of glutamatergic system in the antinociception elicited by (-)-linalool in mice. Nociceptive response was …	Excluded
(-)-LINALOOL ATTENUATES ALLODYNIA IN NEUROPATHIC PAIN INDUCED BY SPINAL NERVE LIGATION IN C57/BL6 MICE	(-)-Linalool is a natural compound with anti-inflammatory and antinociceptive properties. The antinociceptive action of linalool has been reported in several models of inflammatory pain. However, its effects in neuropathic pain have not been investigated. Here, we used the spinal nerve ligation (SNL) model of neuropathic pain and studied the effects of acute and chronic administration of an estab…	Included
Anti-HIV benzylisoquinoline alkaloids and flavonoids from the leaves of Nelumbo nucifera, and structure-activity correlations with related alkaloids	(+)-1(R)-Coclaurine (1) and (-)-1(S)-norcoclaurine (3), together with quercetin 3-O-beta-D-glucuronide (4), were isolated from the leaves of Nelumbo nucifera (Nymphaceae), and identified as anti-HIV principles. Compounds 1 and 3 demonstrated potent anti-HIV activity with EC50 values of 0.8 and <0.8 microg/mL, respectively, and therapeutic index (TI) values of >125 and >25, respectively. Compound …	Excluded
Myogenic constriction is increased in mesenteric resistance arteries from rats with chronic heart failure: instantaneous counteraction by acute AT1 receptor blockade	(1) Increased vascular resistance in chronic heart failure (CHF) has been attributed to stimulated neurohumoral systems. However, local mechanisms may also importantly contribute to set arterial tone. Our aim, therefore, was to test whether pressure-induced myogenic constriction of resistance arteries in vitro--devoid of acute effects of circulating factors--is increased in CHF and to explore und…	Excluded
Effects of lesions to rat spinal cord lamina I cell projection pathways on reactions to acute and chronic noxious stimuli	(1) Lamina I contains large numbers of nociceptive specific cells and wide-dynamic-range (WDR) cells which respond to both noxious and innocuous stimuli. Many of the cells project to the brain. 82% of the projecting axons travel by way of the contralateral dorsolateral funiculus (DLF). (2) Section of the contralateral DLF produced no change in behavioural response to brief mechanical or thermal o…	Excluded
Teriparatide: new preparation. Osteoporosis: less well evaluated than alendronic acid	(1) Oral alendronic acid is the reference drug for women with osteoporosis and a previous vertebral fracture. In a placebo-controlled trial in women who were also taking calcium and vitamin D, treatment with alendronic acid for three years reduced the incidence of symptomatic vertebral fractures (2.3% versus 5%) and wrist fractures (2.2% versus 4.1%) and, albeit with a lower level of evidence, th…	Excluded
Autotomy following peripheral nerve lesions: experimental anaesthesia dolorosa	(1) When hindlimb peripheral nerves are cut across in rats and mice, there is a tendency for the animal to attack the anaesthetic limb. We have called this attack "autotomy". In this paper we describe the time course and degree of autotomy following various types of nerve injury. (2) Four different types of lesion were applied to the sciatic nerve of rats. The most serious autotomy was produced b…	Excluded
Comparative studies of 177Lu-EDTMP and 177Lu-DOTMP as potential agents for palliative radiotherapy of bone metastasis	(177)Lu is presently considered as an excellent radionuclide for developing bone pain palliation agents owing to its suitable nuclear decay characteristics [T(1/2)=6.73d, E(beta)((max))=497keV, E(gamma)=113keV (6.4%) and 208keV (11%)] and large-scale production feasibility with adequate specific activity using moderate flux research reactors. Multidentate polyaminophosphonic acids have already be…	Excluded
Continuous administration of the 5-hydroxytryptamine(1A) agonist (3-chloro-4-fluoro-phenyl)-[4-fluoro-4-{[(5-methyl-pyridin-2-ylmethyl)-a mino]-methyl}piperidin-1-yl]-methadone (F 13640) attenuates allodynia-like behavior in a rat model of trigeminal neuropathic pain	(3-Chloro-4-fluoro-phenyl)-[4-fluoro-4-{[(5-methyl-pyridin-2-yl-methyl)amino]-methyl}piperidin-1-yl]-methadone (F 13640) is a recently discovered high-efficacy 5-hydroxytryptamine (HT)(1A) receptor agonist that produces central analgesia through the neuroadaptive mechanisms of inverse tolerance and cooperation. In a rat model of trigeminal neuropathic pain, the chronic constriction injury of the …	Included
Selective NR1/2B N-methyl-D-aspartate receptor antagonists among indole-2-carboxamides and benzimidazole-2-carboxamides	(4-Benzylpiperidine-1-yl)-(6-hydroxy-1H-indole-2-yl)-methanone (6a) derived from (E)-1 -(4-benzylpiperidin-1-yl)-3-(4-hydroxy-phenyl)-propenone (5) was identified as a potent NR2B subunit-selective antagonist of the NMDA receptor. To establish the structure-activity relationship (SAR) and to attempt the improvement of the ADME properties of the lead, a series of compounds were prepared and tested…	Excluded
Tosedostat. Aminopeptidase inhibitor oncolytic	(Chemical Equation Presented) Tosedostat (CHR-2797) is an orally active aminopeptidase inhibitor that is converted in vivo to a pharmacologically active metabolite, CHR-79888, and exerts an antiproliferative effect against a wide range of leukemic and epithelial tumor cell lines. A wide separation exists between its antiproliferative effects on myeloid and normal bone marrow cells and it shows sy…	Excluded
BAY X1005, a new inhibitor of leukotriene synthesis: in vivo inflammation pharmacology and pharmacokinetics	(R)-2-[4-(quinolin-2-yl-methoxy)phenyl]-2-cyclopentyl acetic acid) (BAY X1005) is an orally active inhibitor of the synthesis of the leukotrienes B4 and C4 in selected animal models that effectively reduces the vascular phenomena of inflammation, i.e., edema formation and leukocyte immigration. The arachidonic acid-induced mouse ear inflammation test allowed the evaluation of the antiedematous ef…	Excluded
A novel (S)-(+)-decursin derivative, (S)-(+)-3-(3,4-dihydroxy-phenyl)-acrylic acid 2,2-dimethyl-8-oxo-3,4-dihydro-2H,8H-pyrano[3,2-g]chromen-3-yl-ester, inhibits ovalbumin-induced lung inflammation in a mouse model of asthma	(S)-(+)-Decursin is a coumarin compound present in herbal extracts that has various biological activities. (S)-(+)-Decursin attenuates pathophysiologic progression in cancer, bacterial infection and neuropathy. Asthma is an inflammatory disease associated with increased infiltration of leukocytes, especially eosinophils, and secretion of mucus into the airways. Although (S)-(+)-decursin, as well …	Excluded
A synthetic approach for (S)-(3-benzyl-3-methyl-2,3-dihydro-benzofuran-6-yl)-piperidin-1-yl-metha none, a selective CB2 receptor agonist	(S)-(3-Benzyl-3-methyl-2,3-dihydro-benzofuran-6-yl)-piperidin-1-yl-metha none, a selective CB2 receptor agonist, was obtained from 3-hydroxy-4-iodo benzoic acid in nine steps with 97.4% ee and 3.4% total yield, which involved palladium catalyzed tandem intramolecular Heck/Suzuki cross coupling reaction, chemical resolution with (+)-norephedrine and Wolf-Kishner reaction as the key steps. (S)-(3-B…	Excluded
Peripheral glutamate receptors participate in interleukin-1 beta-induced mechanical allodynia in the orofacial area of rats	(T)he present study was performed to examine peripheral cytokine-induced mechanical allodynia in the orofacial area and to investigate whether peripheral excitatory amino acids participate in the cytokine-induced mechanical allodynia. Experiments were carried out on male Sprague-Dawley rats. After interleukin-1beta (IL-1beta) was applied subcutaneously to the orofacial area, we examined withdrawa…	Excluded
With hindsight: Full data challenge efficacy	* Agalsidase alfa and agalsidase beta are the first available replacement treatments for Fabry's disease. Fabry's disease is a rare hereditary disorder due to an enzyme deficiency, leading to gradual accumulation of lipids in the body. Agalsidase alfa and agalsidase beta are both similar to the natural human enzyme. Agalsidase alfa is produced by a human cell line and agalsidase beta by a hamster…	Excluded
Workshop summary: Recent developments in HIV-associated sensory polyneuropathies	* Chair & speaker 1: Andrew Rice (Imperial College, London, United Kingdom) * Speaker 2: Catherine Cherry (Burnet Institute/Monash University, Australia) * Speaker 3: David Simpson (Mount Sinai Medical Center, New York, USA) Currently about 33 million people worldwide are living with HIV disease and an increasing percentage of those are gaining access to antiretroviral therapy (ART). As more peop…	Excluded
Workshop summary: Recent developments in post herpetic neuralgia	* Chair & speaker 1: Andrew Rice (London, United Kingdom) * Speaker 2: Robert Dworkin (Rochester, USA) * Speaker 3: Maija Haanpaa (Helsinki, Finland) Herpes zoster and postherpetic neuralgia (PHN) are not only important in the context of neuropathic pain, but are also diseases that are predicted to expand in terms of global significance with the increased prevalence of herpes zoster as a result o…	Excluded
Bortezomib. A last resort in myeloma: Modest efficacy, major risks	* First-line treatment of multiple myeloma depends first and foremost on the patient's age. There is no standard treatment for relapses and the median survival time after the first relapse is only 12 to 15 months. * Bortezomib, a cytotoxic agent, inhibits the 26S proteasome involved in protein breakdown in mammalian cells. It is licensed for use in myeloma after multiple treatment failure. * Thre…	Excluded
Miglustat: In type 1 gaucher's disease: A slight benefit after imiglucerase therapy	* For patients with type 1 Gaucher's disease the standard treatment is imiglucerase enzyme replacement therapy, provided in fortnightly intravenous infusions. * Miglustat inhibits the synthesis of glucosyl-ceramide, the cerebroside that accumulates in Gaucher's disease. Miglustat is now licensed for oral therapy in patients with mild to moderate type 1 Gaucher's disease and who cannot take imiglu…	Excluded
Teriparatide. Osteoporosis: Less well evaluated than alendronic acid	* Oral alendronic acid is the reference drug for women with osteoporosis and a previous vertebral fracture. In a placebo-controlled trial in women who were also taking calcium and vitamin D, treatment with alendronic acid for three years reduced the incidence of symptomatic vertebral fractures (2.3% versus 5%) and wrist fractures (2.2% versus 4.1%) and, albeit with a lower level of evidence, the …	Excluded
Pimecrolimus: Me-too: Too many risks, not beneficial enough in atopic dermatitis	* Symptomatic treatment of atopic dermatitis is initially based on simple measures and moisturising creams. Topical corticosteroids are reserved for treatment of inflammatory exacerbations. * After topical tacrolimus, marketing authorisation has been granted in France for a second topical immunosuppressant, pimecrolimus, as a short-term symptomatic treatment for atopic dermatitis in children from…	Excluded
Cannabis derivatives and pain	* The existence of endogenous receptors for delta9- tetrahydrocannabinol (THC), along with the results of animal pharmacology studies and patients' reports, led scientists to evaluate the analgesic effect of cannabis and its derivatives. * We conducted a review of the literature concerning the analgesic and adverse effects of cannabis, using the standard Prescrire methodology. * A meta-analysis o…	Excluded
Pregabalin: Very similar to gabapentin	* The first-line treatment for partial epilepsy is carbamazepine monotherapy; gabapentin monotherapy is an alternative, given its lower risk of drug-drug interactions. * The standard treatment for neuropathic pain associated with diabetes or post-herpetic neuralgia is a tricyclic antidepressant, with gabapentin as an alternative. Few drugs are available in this setting, and their efficacy is ofte…	Excluded
Intralesion transplantation of serotonergic precursors enhances locomotor recovery but has no effect on development of chronic central pain following hemisection injury in rats	,The effects of intralesion grafts of serotonergic precursors on locomotor recovery and development of chronic pain were assessed after chronic spinal cord hemisection injury (SCI) in rats. Serotonin- and brain-derived neurotrophic factor-secreting (RN46A-B14) and RN46A-vector-only cells were transplanted into the site of T13 lateral hemisection 10 days following injury in immunosuppressed animal…	Included
Antinociceptive property of Emblica officinalis Gaertn (Amla) in high fat diet-fed/low dose streptozotocin induced diabetic neuropathy in rats	. Diabetic neuropathic pain is an important microvascular complication in diabetes mellitus and oxidative stress plays a vital role in associated neural and vascular complications. The present study investigated flavonoid rich fruit extract (ethyl acetate:methanol fraction) of E.officinalis (10 mg/kg), in type II diabetes (high fat diet fed/low dose streptozotocin) induced diabetic neuropathy in …	Included
BETA BETA' IMINODIPROPIONITRILE IMPAIRS RETROGRADE AXONAL TRANSPORT	.beta.,.beta.'-Iminodiopropionitrile (IDPN), a neurotoxin, causes redistribution of neurofilaments in axons followed by the development of proximal axonal swellings and, in chronic intoxication, a distal decrease in axonal caliber. The latter changes are caused by a selective impairment in the slow anterograde axonal transport of neurofilament proteins. To assess the role of retrograde axonal tra…	Excluded
EFFECT OF BACITRACIN ON THE BIO DEGRADATION OF BETA ENDORPHIN	.beta.-endorphin was incubated with rat brain homogenate, and the amino acids released were measured by amino acid analysis. Phe, Leu, Tyr and Lys were liberated in the greatest amount indicating that the cleavage of Leu77-Phe78 and some Lys-X peptide bonds with endopeptidases followed by the removal of the terminal residues by exopeptidases were the main routes of .beta.-endorphin degradation in…	Excluded
Sciatic nerve block fails in preventing the development of late stress-induced hyperalgesia when high-dose fentanyl is administered perioperatively in rats	: Sciatic nerve block fails in preventing the development of late stress-induced hyperalgesia (SIH) when high-dose fentanyl is administered perioperatively in rats. BACKGROUND AND OBJECTIVES: The aim of our study was to evaluate the effect of regional anesthesia (RA) on hyperalgesia and long-term pain vulnerability after surgery in rats exposed or not to high doses of fentanyl intraoperatively. M…	Excluded
Changes in [125I]hCGRP binding in rat spinal cord in an experimental model of acute, peripheral inflammation	[125I]Human calcitonin gene-related peptide ([125I]hCGRP) binding in the dorsal horn of the spinal cord exhibited differential changes among laminae over time in response to unilateral adjuvant-induced inflammation. In laminae I/II, 4 days after induction of inflammation, the binding decreased 36% on the side of the spinal cord ipsilateral to the inflammation, while there was no change on the con…	Excluded
Intrathecal [6]-Gingerol Administration Alleviates Peripherally induced Neuropathic Pain in Male Sprague-Dawley Rats	[6]-Gingerol, a structural analog of capsaicin, is an agonist of the transient receptor potential vanilloid 1 channel, which is known to have therapeutic properties for the treatment of pain and inflammation. The main objective of this study was to determine the central effect of [6]-gingerol on neuropathic pain when injected intrathecally at the level of the lumbar spinal cord. [6]-Gingerol dist…	Included
The dermatomes in man	[long dash]During 30 yrs. of neural surgery the author has been able to map out nearly all the dermatomes in man by Sherrington's method (i.e., by outlining the borders of the sensibility which remains after a large no. of contiguous roots have been divided, and a single root in the middle has been left intact). The results show that the dermatomes of man overlap to the same large degree as do th…	Excluded
Supraspinal hyperalgesia and spinal analgesia by [Phe1psi(CH2-NH)Gly2]nociceptin-(1-13)-NH2 in rat	[Phe1psi(CH2-NH)Gly2]nociceptin-(1-13)-NH2, a pseudopeptide analog of nociceptin, was originally seen as an antagonist of nociceptin receptors. In the present study, it was observed that intracerebroventricular (i.c.v.) injection of this pseudopeptide (1, 5, 10 microg) significantly decreased the tail-flick latency of rats, indicating a hyperalgesic effect, while intrathecal (i.t.) injection of i…	Excluded
Dual effects of [Tyr(6)]-gamma2-MSH(6-12) on pain perception and in vivo hyperalgesic activity of its analogues	[Tyr(6)]-gamma2-MSH(6-12) with a short effecting time of about 20 min is one of the most potent rMrgC receptor agonists. To possibly increase its potency and metabolic stability, a series of analogues were prepared by replacing the Tyr(6) residue with the non-canonical amino acids 3-(1-naphtyl)-L-alanine, 4-fluoro-L-phenylalanine, 4-methoxy-L-phenylalanine and 3-nitro-L-tyrosine. Dose-dependent n…	Excluded
90Y ibritumomab tiuxetan	<sup>90</sup>Yttrium (<sup>90</sup>Y) ibritumomab tiuxetan is a radiolabeled murine anti-CD20 monoclonal antibody that binds specifically to the CD20 antigen on normal and malignant B lymphocytes. It has antitumor activity as a result of emission of beta particles. It is administered as part of a therapeutic regimen which includes rituximab, a monoclonal antibody which produces antibody-dependent…	Excluded
Antiviral chemotherapy and prophylaxis of viral respiratory disease	0ue to be major causes of morbidity and mortality. Currently available chemotherapy is limited to oral amantadine for uncomplicated influenza A and aerosolized ribavirin for respiratory syncytial virus (RSV) infections. Amantadine is also efficacious for chemoprophylaxis of influenza A virus infections. Rimantadine has similar clinical efficacy and is better tolerated than amantadine. Aerosolized…	Excluded
Spinal effect of a neuropeptide FF analogue on hyperalgesia and morphine-induced analgesia in mononeuropathic and diabetic rats	1 1DMe, a neuropeptide FF (NPFF) analogue, has been shown to produce antinociception and to enhance morphine analgesia in rats after intrathecal administration. To determine whether 1DMe could correct hyperalgesia and restore morphine efficacy in mononeuropathic (MN) and diabetic (D) rats we examined the spinal effect of 1DMe in MN and D rats without and after spinal blockade of mu- and delta-opi…	Included
GABA(B) receptor modulators potentiate baclofen-induced depression of dopamine neuron activity in the rat ventral tegmental area	1 2,6-Di-tert-butyl-4-(3-hydroxy-2,2-dimethyl-propyl)-phenol (CGP7930) is a recently reported positive allosteric modulator of gamma-aminobutyric acid (GABA)(B) receptors. In this study, we assessed the ability of CGP7930 to modulate the baclofen-induced depression of dopamine (DA) neuron activity via the activation of GABA(B) receptors in the ventral tegmental area in rat midbrain slices. 2 The …	Excluded
The effect of ABT-702, a novel adenosine kinase inhibitor, on the responses of spinal neurones following carrageenan inflammation and peripheral nerve injury	1 Adenosine (ADO) receptor activation modulates sensory transmission in the dorsal horn. Little is known about the circumstances underlying release of the purine. The present study was conducted to investigate the effect of a novel and potent non-nucleoside adenosine kinase (AK) inhibitor, ABT-702, on the responses of dorsal horn neurones to selected peripheral stimuli. ABT-702 is orally effectiv…	Included
Spinal alpha(2)-adrenergic and muscarinic receptors and the NO release cascade mediate supraspinally produced effectiveness of gabapentin at decreasing mechanical hypersensitivity in mice after partial nerve injury	1 After partial nerve injury, the central analgesic effect of systemically administered gabapentin is mediated by both supraspinal and spinal actions. We further evaluate the mechanisms related to the supraspinally mediated analgesic actions of gabapentin involving the descending noradrenergic system. 2 Intracerebroventricularly (i.c.v.) administered gabapentin (100 mu g) decreased thermal and me…	Included
Analgesic activity of a novel use-dependent sodium channel blocker, crobenetine, in mono-arthritic rats	1 Although sodium channel blockers are effective analgesics in neuropathic pain, their effectiveness in inflammatory pain has been little studied. Sodium channels are substantially up-regulated in inflamed tissue, which suggests they play a role in maintenance of chronic inflammatory pain. We have examined the effects of sodium channel blockers on mobility, joint hyperalgesia and inflammation ind…	Excluded
AM404, an inhibitor of anandamide uptake, prevents pain behaviour and modulates cytokine and apoptotic pathways in a rat model of neuropathic pain	1 An attractive alternative to the use of direct agonists at the cannabinoid receptor type 1 (CB1) in the control of neuropathic pain may be to potentiate the actions of endogenous cannabinoids. Thus, the effects of AM404, an inhibitor of anandamide uptake, were assessed in an experimental model of neuropathic pain in rats. 2 Daily treatment with AM404 prevented, time- and dose-dependently, the d…	Included
Effect of resiniferatoxin on the noxious heat threshold temperature in the rat: a novel heat allodynia model sensitive to analgesics	1 An increasing-temperature hot plate (ITHP) was introduced to measure the noxious heat threshold (45.3 +/- 0.3degreesC) of unrestrained rats, which was reproducible upon repeated determinations at intervals of 5 or 30 min or 1 day, 2 Morphine, diclofenac and paracetamol caused an elevation of the noxious heat threshold following i.p. pretreatment, the minimum effective doses being 3, 10 and 200 …	Excluded
Potent analgesic effects of anticonvulsants on peripheral thermal nociception in rats	1 Anticonvulsant agents are commonly used to treat neuropathic pain conditions because of their effects on voltage- and ligand-gated channels in central pain pathways. However, their interaction with ion channels in peripheral pain pathways is poorly understood. Therefore, we studied the potential analgesic effects of commonly used anticonvulsant agents in peripheral nociception. 2 We injected an…	Excluded
Efficacy of antiepileptic isomers of valproic acid and valpromide in a rat model of neuropathic pain	1 Antiepileptic drugs (AEDs) are often utilized in the treatment of neuropathic pain. The major AED valproic acid (VPA) is of particular interest as it is thought to engage a variety of different neural mechanisms simultaneously. However, the clinical use of VPA is limited by two rare but life-threatening side effects: teratogenicity and hepatotoxicity. 2 We synthesized VPA's corresponding amide:…	Included
Antidiuretic effect of beta-endorphin and morphine in Brattleboro rats: development of tolerance and physical dependence after chronic morphine treatment	1 beta-Endorphin (2 micrograms injected into the lateral ventricles) produced a significant decrease in the urine outflow and in the excretion of Na+ and K+ in Brattleboro rats, animals suffering from severe diabetes insipidus. Morphine intracerebrally also produced antidiuresis, as compared to saline-treated controls. 2 Morphine injected intraperitoneally caused a dose-dependent decrease in the …	Excluded
Muscarinic receptor function, density and G-protein coupling in the overactive diabetic rat bladder	1 Bladder smooth muscle sensitivity to muscarinic agonists is increased in the overactive bladder. Treatment of rats with streptozotocin induces a diabetic state in which the bladder muscle is overactive and also supersensitive to muscarinic agonists. This study has examined bladder contraction, muscarinic receptor density and receptor/G-protein coupling in the streptozotocin-induced overactive b…	Excluded
Pharmacological characterisation of a rat model of incisional pain	1 Both clinical and preclinical models of postsurgical pain are being used more frequently in the early evaluation of new chemical entities. In order to assess the validity and reliability of a rat model of postincisional pain, the effects of different classes of clinically effective analgesic drugs were evaluated against multiple behavioural end points. 2 Following surgical incision, under gener…	Excluded
Further evidence for the role of the alpha(2)delta subunit of voltage dependent calcium channels in models of neuropathic pain	1 Current analgesic therapy is dominated by NSAIDs and opiates, however these agents have limited efficacy in the treatment of neuropathic pain. The novel anticonvulsant agent gabapentin (Neurontin) has been shown to be an effective treatment for neuropathic pain in the clinic. Recent studies have demonstrated that gabapentin selectively interacts with the alpha(2)delta subunit of voltage depende…	Included
The involvement of the opioidergic system in the antinociceptive mechanism of action of antidepressant compounds	1 Debate exists as to the nature of antidepressant-induced antinociception. It is unclear whether antidepressants are inherently antinociceptive, are able to potentiate opioid antinociception or both. We have used the acetic acid induced abdominal constriction assay in mice to investigate antidepressant-induced antinociception. 2 All the antidepressants tested (s.c.) produced dose-dependent prote…	Excluded
Involvement of the periaqueductal grey matter and spinal 5-hydroxytryptaminergic pathways in morphine analgesia: effcts of lesions and 5-hydroxytryptamine depletion	1 Electrolytic lesions of the periaqueductal grey matter (PAG) were made in rats. The analgesia produced by intraperitoneal injection of morphine (10 and 20 mg/kg), tested by the tail flick and hot plate methods, was substantially reduced in the lesioned rats. Baseline pain thresholds were unaffected by the lesions.2 The lesion effects were not due to damage to the dorsal raphe nucleus. The exten…	Included
Actions of two naturally occurring saturated N-acyldopamines on transient receptor potential vanilloid 1 (TRPV1) channels	1 Four long-chain, linear fatty acid dopamides (N-acyldopamines) have been identified in nervous bovine and rat tissues. Two unsaturated members of this family of lipids, N-arachidonoyl-dopamine (NADA) and N-oleoyl-dopamine, were shown to potently activate the transient receptor potential channel type V1 (TRPV1), also known as the vanilloid receptor type 1 for capsaicin. However, the other two co…	Excluded
Decreased expression of glial cell line-derived neurotrophic factor signaling in rat models of neuropathic pain	1 In an attempt to clarify whether glial cell line-derived neurotrophic factor (GDNF), a survival factor for subpopulations of primary afferent neurons, is involved in the states of neuropathic pain, we observed changes in the expressions of GDNF and its signal-transducing receptor Ret after nerve injury in two rat models of neuropathic pain. 2 In the rats treated with sciatic nerve ligation (chr…	Included
Identification of MEK1 as a novel target for the treatment of neuropathic pain	1 In the present study we have attempted to identify changes in gene expression which are associated with neuropathic pain using subtractive suppression hybridization analysis of the lumbar spinal cord of animals suffering streptozocin induced diabetic neuropathy. 2 Using this approach, we found a significant up-regulation of several key components of the extracellular signal-regulated kinase (ER…	Included
The entero-insular-hypothalamo axis and therapeutic intervention with incretins in type 2 diabetes mellitus	1 Incretin effect was conceptualised in 1964<sup>4</sup>, and was enlarged in 1976, to entero-insular hypothalamic axis in experimental animals. 2 The understanding of the role of entero-insular axis in type 2 diabetes has paved the way for advent of incretin mimetics and incretin enhancers as therapeutic tools<sup>20-22, 29-34, 38,39</sup>. 3 As GLP-1 and GIP are quickly degraded by DPP-IV enzym…	Excluded
Acute and late effects on induction of allodynia by acromelic acid, a mushroom poison related structurally to kainic acid	1 Ingestion of a poisonous mushroom Clitocybe acromelalga is known to cause severe tactile pain (allodynia) in the extremities for a month and acromelic acid (ACRO), a kainate analogue isolated from the mushroom, produces selective damage of interneurons of the rat lower spinal cord when injected either systemically or intrathecally. Since ACRO has two isomers, ACRO-A and ACRO-B, here we examined…	Excluded
Inflammatory effects of prostaglandin D2 in rat and human skin	1 Intradermal injection of prostaglandin (PG) D1 and D2 in the human forearm produced a long-lasting dose-related erythema. When compared with prostaglandin E1 or E2 the order of potency for erythema production was PGE1 greater than PGE2 greater than PGD2 greater than PGD1. 2 In rat skin, prostaglandin D2 but not D1 caused an increase in vascular permeability as quantitated by the Evans blue meth…	Excluded
Characterization of nociceptin hyperalgesia and allodynia in conscious mice	1 Intrathecal (i.t.) administration of nociceptin and high doses of morphine induced allodynia in response to innocuous tactile stimuli, and i.t. nociceptin evoked hyperalgesia in response to noxious thermal stimuli in conscious mice. Here we have characterized the nociceptin-induced allodynia and compared it with the morphine-induced allodynia and the nociceptin-evoked hyperalgesia. 2 Nociceptin…	Excluded
CHARACTERIZATION OF EP-RECEPTOR SUBTYPES INVOLVED IN ALLODYNIA AND HYPERALGESIA INDUCED BY INTRATHECAL ADMINISTRATION OF PROSTAGLANDIN E(2) TO MICE	1 Intrathecal (i.t.) administration of prostaglandin E(2) (PGE(2)) to conscious mice induced allodynia, a state of discomfort and pain evoked by innocuous tactile stimuli, and hyperalgesia as assessed by the hot plate test. We characterized prostaglandin E receptor subtypes (EP(1-3)) involved in these sensory disorders by use of 7 synthetic prostanoid analogues. 2 Sulprostone (EP(1) < EP(3)) indu…	Excluded
Role of tachykinin NK2 receptors in normal and altered rectal sensitivity in rats	1 Irritable bower syndrome is characterized by visceral hyperalgesia commonly associated with stress and inflammatory processes. We investigated the role of tachykinin NK2 receptors in the ability of trinitrobenzenesulphonic acid (TNBS) and stress to enhance the sensitivity of the rat rectum to distension using a selective tachykinin NK2 receptor antagonist (MEN 11420). 2 Rats were fitted with el…	Excluded
Role of spinal NMDA receptors, protein kinase C and nitric oxide synthase in the hyperalgesia induced by magnesium deficiency in rats	1 Magnesium (Mg)-deficient rats develop a mechanical hyperalgesia which is reversed by a N-Methyl-D-Aspartate (NMDA) receptor antagonist. Given that functioning of this receptor-channel is modulated by Mg, we wondered whether facilitated activation of NMDA receptors in Mg deficiency state may in turn trigger a cascade of specific intracellular events present in persistent pain. Hence, we tested s…	Excluded
Metformin enhances insulin signalling in insulin-dependent and-independent pathways in insulin resistant muscle cells	1 Metformin lowers blood glucose levels in type 2 diabetic patients. To evaluate the insulin sensitizing action of metformin on skeletal muscle cells, we have used C2C12 skeletal muscle cells differentiated in chronic presence or absence of insulin. 2 Metformin was added during the last 24 h of differentiation of the C2C12 myotubes. Insulin-stimulated tyrosine phosphorylation of insulin receptor …	Excluded
Dural vasodilation causes a sensitization of rat caudal trigeminal neurones in vivo that is blocked by a 5-HT1B/1D agonist	1 Migraine headache pain is thought to result from an abnormal distention of intracranial, extracerebral blood vessels and the consequent activation of the trigeminal nervous system. Migraine is also often accompanied by extracranial Sensory disturbances from facial tissues. These experiments investigate whether meningeal dilation produces central sensitization of neurones that receive convergent…	Excluded
Knockdown of spinal metabotropic glutamate receptor 1 (mGluR(1)) alleviates pain and restores opioid efficacy after nerve injury in rats	1 Nerve injury often produces long-lasting spontaneous pain, hyperalgesia and allodynia that are refractory to treatment, being only partially relieved by clinical analgesics, and often insensitive to morphine. With the aim of assessing its therapeutic potential, we examined the effect of antisense oligonucleotide knockdown of spinal metabotropic glutamate receptor 1 (mGluR(1)) in neuropathic rat…	Included
A nitric oxide (NO)-releasing derivative of gabapentin, NCX 8001, alleviates neuropathic pain-like behavior after spinal cord and peripheral nerve injury	1 Nitric oxide (NO) participates, at least in part, to the establishment and maintenance of pain after nerve injury. Therefore, drugs that target the NO/cGMP signaling pathway are of interest for the treatment of human neuropathic pain. Various compounds endowed with NO-releasing properties modulate the expression and function of inducible nitric oxide synthase (iNOS), the key enzyme responsible …	Included
Nociceptin orphanin FQ and nocistatin on learning and memory impairment induced by scopolamine in mice	1 Nociceptin, also known as orphanin FQ, is an endogenous ligand for the orphan opioid receptor-like receptor 1 (ORL1) and involves in various functions in the central nervous system (CNS). On the other hand, nocistatin is recently isolated from the same precursor as nociceptin and blocks nociceptin-induced allodynia and hyperalgesia. 2 Although ORL1 receptors which display a high degree of seque…	Excluded
Nociceptin/orphanin FQ and nocistatin on learning and memory impairment induced by scopolamine in mice	1 Nociceptin, also known as orphanin FQ, is an endogenous ligand for the orphan opioid receptor-like receptor 1 (ORL1) and involves in various functions in the central nervous system (CNS). On the other hand, nocistatin is recently isolated from the same precursor as nociceptin and blocks nociceptin-induced allodynia and hyperalgesia. 2 Although ORL1 receptors which display a high degree of seque…	Excluded
Comparison of the antinociceptive activity of two new NO-releasing derivatives of the NSAID S-ketoprofen in rats	1 Nonsteroidal anti-inflammatory drugs ( NSAIDs) inhibit cyclooxygenase ( COX) enzymes inducing analgesic, anti-inflammatory and antipyretic actions. They are not devoid of severe side effects and so, the search for new compounds with similar or higher effectiveness and a lower incidence of undesired actions is important. Nitric oxide (NO)-releasing NSAIDs resulted from this search. 2 We have com…	Excluded
Orphanin FQ inhibits capsaicin-induced thermal nociception in monkeys by activation of peripheral ORL1 receptors	1 Orphanin FQ (OFQ), an endogenous peptide for ORL1 receptors, has been identified. Although the actions of OFQ have much in common with those of opioid peptides at the cellular level, behavioral studies in rodents seem conflicting. 2 The aim of this study was to investigate the potential pronociceptive or antinociceptive function of peripheral ORL1 receptors in primates. Experiments were conduct…	Excluded
Oxaliplatin induces hyperexcitability at motor and autonomic neuromuscular junctions through effects on voltage-gated sodium channels	1 Oxaliplatin, an effective cytotoxic treatment in combination with 5-fluorouracil for colorectal cancer, is associated with sensory, motor and autonomic neurotoxicity. Motor symptoms include hyperexcitability while autonomic effects include urinary retention, but the cause of these side-effects is unknown. We examined the effects on motor nerve function in the mouse hemidiaphragni and on the aut…	Excluded
Endogenous opioid mechanisms partially mediate P2X(3)/P2X(2/3)(-) related antinociception in rat models of inflammatory and chemogenic pain but not neuropathic pain	1 P2X(3)/P2X(2/3) receptors have emerged as important components of nociception. However, there is limited information regarding the neurochemical systems that are affected by antagonism of the P2X(3)/ P2X(2/3) receptor and that ultimately contribute to the ensuing antinociception. In order to determine if the endogenous opioid system is involved in this antinociception, naloxone was administered…	Included
Modulation of trigeminal sensory neuron activity by the dual cannabinoid-vanilloid agonists anandamide, N-arachidonoyl-dopamine and arachidonyl-2-chloroethylamide	1 Peripheral cannabinoids have been shown to suppress nociceptive neurotransmission in a number of behavioral and neurophysiological studies. It is not known, however, whether cannabinoids exert this action through direct interactions with nociceptors in the periphery and/or if other processes are involved. To gain a better understanding of the direct actions of cannabinoid-vanilloid agonists on …	Excluded
The antimigraine 5-HT1B/1D receptor agonists, sumatriptan, zolmitriptan and dihydroergotamine, attenuate pain-related behaviour in a rat model of trigeminal neuropathic pain	1 Peripheral lesion to the trigeminal nerve may induce severe pain states. Several lines of evidence have suggested that the antimigraine effect of the triptans with 5-HT1B/1D receptor agonist properties may result from inhibition of nociceptive transmission in the spinal nucleus of the trigeminal nerve by these drugs. On this basis, we have assessed the potential antinociceptive effects of sumat…	Included
Pharmacological profiles of a novel opioid receptor-like1 (ORL1) receptor antagonist, JTC-801	1 Pharmacological effects of a novel opioid receptor-likel (ORL1) receptor antagonist, [N-(4-amino-2-methylquinolin-6-yl)-2-(4-ethylphenoxymethyl) benzamide monohydrochloride] (JTC-801), were examined in in vitro and in vivo. 2 JTC-801 inhibited the binding of [H-3]-nociceptin to human ORL1 receptors expressed in HeLa cells with a K-i value of 44.5 nm. 3 JTC-801 completely antagonized the suppres…	Excluded
Influence of flupirtine on a G-protein coupled inwardly rectifying potassium current in hippocampal neurones	1 Previous studies have shown that flupirtine, a centrally acting, non-opioid analgesic agent, also exhibits neuroprotective activity in focal cerebral ischaemia in mice and reduces apoptosis induced by NMDA, gp 120 of HIV, prior protein fragment or lead acetate as well as necrosis induced by glutamate or NMDA in cell culture. To study the potential mechanism of the neuroprotective action of flup…	Excluded
Characterization of EP receptor subtypes responsible for prostaglandin E-2-induced pain responses by use of EP1 and EP3 receptor knockout mice	1 Prostaglandin E-2 (PGE(2)) is known to be the principal pro-inflammatory prostanoid and play an important role in nociception. To identify PGE receptor (EP) subtypes that mediate pain responses to noxious and innocuous stimuli, we studied them by use of EP1 and EP3 knockout (EP1- - and EP3- -) mice. 2 PGE(2) could induce mechanical allodynia in EP1+ +, EP3+ + and EP3- - mice, but not in EP1- - …	Excluded
Characterization of EP receptor subtypes responsible for prostaglandin E2-induced pain responses by use of EP1 and EP3 receptor knockout mice	1 Prostaglandin E2 (PGE2) is known to be the principal pro-inflammatory prostanoid and play an important role in nociception. To identify PGE receptor (EP) subtypes that mediate pain responses to noxious and innocuous stimuli, we studied them by use of EP1 and EP3 knockout (EP1-/- and EP3-/-) mice. 2 PGE2 could induce mechanical allodynia in EP1+/+, EP3+/+ and EP3-/- mice, but not in EP1-/- mice.…	Excluded
Peripheral analgesia: mechanism of the analgesic action of aspirin-like drugs and opiate-antagonists	1 Prostaglandins released by tissue injury sensitize nociceptors and produce hyperalgesia. 2 Aspirin-like drugs inhibit prostaglandins I2 and E2, synthesis, which explains their anti-algic effect. 3 The anti-algic effect of aspirin-like drugs in carrageenin-induced rat paw inflammation may involve a central component. 4 Prostaglandin E2-induced hyperalgesia, once established, is not relieved by s…	Excluded
Suppression of pancreatitis-related allodynia/hyperalgesia by proteinase-activated receptor-2 in mice	1 Proteinase-activated receptor-2 (PAR2), a receptor activated by trypsin and tryptase, is abundantly expressed in the gastrointestinal tract including the C-fiber terminal, and might play a role in processing of visceral pain. In the present study, we examined and characterized the roles of PAR2 in pancreatitis-related abdominal hyperalgesia/allodynia in mice. 2 Caerulein, administered i.p. once…	Excluded
Purinergic regulation of vascular tone and remodelling	1 Purinergic signalling is involved both in short-term control of vascular tone and in longer-term control of cell proliferation, migration and death involved in vascular remodelling. 2 There is dual control of vascular tone by adenosine 5'-triphosphate (ATP) released from perivascular nerves and by ATP released from endothelial cells in response to changes in blood flow (shear stress) and hypoxi…	Excluded
Spinal pharmacology of tactile allodynia in diabetic rats	1 Rats develop tactile allodynia to stimulation of the plantar surface of the hindpaw with von Frey filaments within days of the onset of streptozotocin-induced diabetes. This is prevented by insulin and alleviated by systemic lignocaine, but the aetiology is unknown. 2 Using indwelling lumbar intrathecal catheters to deliver pharmacological agents, we have investigated whether tactile allodynia …	Included
Enhancement of the effects of a complete inhibitor of enkephalin-catabolizing enzymes, RB 101, by a cholecystokinin-B receptor antagonist in diabetic rats	1 RB 101, a complete inhibitor of enkephalin-catabolizing enzymes, has been previously shown to produce antinociception in normal rats after systemic administration. Moreover, its coadministration with a cholecystokinin-B (CCK-B) receptor antagonist has been shown to strongly enhance its antinociceptive effect in normal rats. In this work, we determined whether RE 101 was able to reduce hyperalge…	Included
Nociceptin and the ORL-1 ligand [Phe1psi (CH2-NH)Gly2]nociceptin(1-13)NH2 exert anti-opioid effects in the Freund's adjuvant-induced arthritic rat model of chronic pain	1 Stimulation of the opioid receptor-like1 (ORL-1) receptor by nociceptin (NC) produces hyperalgesia and reverses the antinociceptive effects induced by opioids. Most studies concerning the central effects of NC were conducted using acute pain models. The role NC may play in chronic inflammation remains unelucidated. 2 The present study was undertaken to assess the action of NC in the Freund's ad…	Excluded
Cortical potentials evoked by nociceptive stimuli: their depression by a factor released during saphenous nerve stimulation in the rat	1 The amplitudes of the first positive and the first negative waves of cortical potentials evoked by electrical stimulation of the dental pulp in the rat were decreased following electrical stimulation of the peripheral cut end of the saphenous nerve.2 This effect was greatly diminished when the stimulation of the saphenous nerve was performed with the saphenous or femoral veins ligated.3 During …	Excluded
Potentiation of the antinociceptive effect of clomipramine by a 5-ht(1A) antagonist in neuropathic pain in rats	1 The benefit of antidepressant treatment in human neuropathic pain is now well documented, but the effect is limited and slow to appear. It has been demonstrated that the association of a 5-HT1A antagonist and a serotoninergic antidepressant reduced the delay of action and increases the thymoanaleptic effect of the drug. 2 The purpose of this work was to evaluate the combination of an antidepres…	Included
Cu2+(1,10 phenanthroline)3 is an open-channel blocker of the human skeletal muscle sodium channel	1 The formation of disulfide bridges is a classical approach used to study the mobility, proximity and distances of residues in a variety of proteins, including ligand- and voltage-gated ion channels. We performed patch-clamp studies to investigate the interaction of a pair of cysteines introduced into the human skeletal muscle voltage-gated Na<sup>+</sup> channel (hNa <sub>v</sub>1.4) using the …	Excluded
Effects of spinally administered P2X receptor agonists and antagonists on the responses of dorsal horn neurones recorded in normal, carrageenan-inflamed and neuropathic rats	1 The function and role of P2X receptors in the spinal transmission of nociception was investigated using the selective P2X receptor agonists, alpha,beta-methylene ATP (alpha,beta-me ATP) and beta,gamma-methylene-L-ATP (beta,gamma-me-L-ATP) and the P2X receptor antagonists pyridoxal-phosphate-6-azophenyl-2',4'-disulphonate (PPADS) and suramin. 2 Intrathecal administration of 5 and 50 mu g of beta…	Included
The stimulation of capsaicin-sensitive neurones in a vanilloid receptor-mediated fashion by pungent terpenoids possessing an unsaturated 1,4-dialdehyde moiety	1 The irritant fungal terpenoid isovelleral caused protective eye-wiping movements in the rat upon intraocular instillation and showed cross-tachyphylaxis with capsaicin, the pungent principle in hot pepper. 2 Isovelleral induced a dose-dependent calcium uptake by rat dorsal root ganglion neurones cultured in vitro with an EC-50 of 95 nM, which was fully inhibited by the competitive vanilloid rec…	Excluded
Calotropis procera latex-induced inflammatory hyperalgesia - effect of bradyzide and morphine	1 The milky white latex of the plant Calotropis procera induces inflammatory response upon accidental exposure and on local administration that could be effectively ameliorated by antihistaminic and standard anti-inflammatory drugs. 2 The aim of the present study was to evaluate the anti-oedematogenic and analgesic effect of the bradykinin antagonist, bradyzide (BDZ) and the opioidergic analgesic…	Excluded
A comparison of Ca2+ channel blocking mode between gabapentin and verapamil: implication for protection against hypoxic injury in rat cerebrocortical slices	1 The mode of Ca2+ channel blocking by gabapentin [1-(aminomethyl) cyclohexane acetic acid] was compared to those of other Ca2+ channel blockers, and the potential role of Ca2+ channel antagonists in providing protection against hypoxic injury was subsequently investigated in rat cerebrocortical slices. 2 mRNA for the alpha(2)delta subunits of Ca2+ channels was found in rat cerebral cortex. 3 Nit…	Excluded
Relevance of tumour necrosis factor-alpha for the inflammatory and nociceptive responses evoked by carrageenan in the mouse paw	1 The present study evaluated the participation of tumour necrosis factor-alpha (TNF-alpha) in the inflammatory and nociceptive responses evoked by carrageenan in the mouse paw. 2 The intraplantar injection of carrageenan ( 300 mu g paw(-1)) induced a marked and biphasic paw oedema formation ( peaks at 6 and 72 h), which was accompanied by a long-lasting mechanical allodynia (that remained elevat…	Excluded
Alpha1A- and alpha1D-adrenoceptors are the major functional subtypes of renal alpha1-adrenoceptors in streptozotocin-induced diabetic and normal Sprague-Dawley rats	1 The present study investigated the effect of streptozotocin-induced diabetes on alpha(1)-adrenoceptor subtypes in rat renal resistance vessels. 2 Studies on renal haemodynamics were carried out 7 days after the last streptozotocin. Changes in renal blood flow were recorded in response to electrical stimulation of the renal nerve (RNS) and a range of adrenergic agonists; noradrenaline (NA), phen…	Excluded
In vivo evidence for a role of protein kinase C in peripheral nociceptive processing	1 The present study was designed to characterize the nociceptive response induced by protein kinase C (PKC) peripheral activation and to investigate if this biochemical event is important for the nociceptive response induced by formaldehyde, and bradykinin (BK). 2 Intraplantar injection of phorbol-12,13-didecanoate (PDD; 0.01, 0.1 or 1 mug), a PKC activator, but not of 4alpha-PDD (inactive analog…	Excluded
Effect of short-term outlet obstruction on rat bladder nerve density and contractility	1 The present study was designed to investigate the relationship between innervation density and contractile responses to field stimulation and exogenous agonists at early time points after induction of bladder outlet obstruction (BOO) in rats. 2 When compared with sham-operated animals, 1, 3 and 7 days of BOO were associated with a 75%, 80% and 90% increase of bladder weight. Field stimulation c…	Excluded
Cannabinoid receptor-independent actions of the aminoalkylindole WIN 55,212-2 on trigeminal sensory neurons	1 The prototypical aminoalkylindole cannabinoid WIN 55,212-2 (WIN-2) has been shown to produce antihyperalgesia through a peripheral mechanism of action. However, it is not known whether WIN-2 exerts this action directly via cannabinoid receptors located on primary afferents or if other, perhaps indirect or noncannabinoid, mechanisms are involved. To address this question, we have examined the sp…	Excluded
ANPIRTOLINE, A NOVEL, HIGHLY POTENT 5-HT1B RECEPTOR AGONIST WITH ANTINOCICEPTIVE ANTIDEPRESSANT-LIKE ACTIONS IN RODENTS	1 The purpose of the present study was to relate the effects of the novel drug, anpirtoline, on 5-hydroxytryptamine (5-HT) receptor subtypes to its antinociceptive and antidepressant-like actions in rodents. 2 Binding assays with rat brain membranes have shown that anpirtoline bound with a much higher affinity to 5-HT1B receptors (K(i) = 28 nM) than to 5-HT1A (K(i) = 150 nM) and 5-HT2 (K(i) = 1.4…	Excluded
Inhibition of fatty acid amide hydrolase produces analgesia by multiple mechanisms	1 The reversible fatty acid amide hydrolase (FAAH) inhibitor OL135 reverses mechanical allodynia in the spinal nerve ligation (SNL) and mild thermal injury (MTI) models in the rat. The purpose of this study was to investigate the role of the cannabinoid and opioid systems in mediating this analgesic effect. 2 Elevated brain concentrations of anandamide (350 pmol g(-1) of tissue vs 60 pmol g(-1) i…	Included
Assessment of the role of alpha(2)-adrenoceptor subtypes in the antinociceptive, sedative and hypothermic action of dexmedetomidine in transgenic mice	1 The role of alpha(2)-adrenoceptor (AR) subtypes in the modulation of acute nociception, motor behaviour and body temperature, has been investigated by determining the activity of the alpha(2)AR selective agonist dexmedetomidine (Dex) in mice devoid of individual alpha(2)AR subtypes through either a point (alpha(2A)) Or null (alpha(2B)/alpha(2C)) mutation ('knock-out'). 2 In a rodent model of ac…	Excluded
Biological activities of Bv8 analogues	1 The small protein Bv8, secreted by the skin of the frog Bombina variegata, belongs to a novel family of secreted proteins whose orthologues have been identified in snakes (MIT) and in mammals (prokineticins (PKs)). A characteristic feature of this protein family is the same N-terminal sequence, AVITGA, and the presence of 10 cysteines with identical spacing in the C-terminal domain. Two closely…	Excluded
Activation of the cAMP transduction cascade contributes to the mechanical hyperalgesia and allodynia induced by intradermal injection of capsaicin	1 The spinal role of the cAMP transduction cascade in nociceptive processing was investigated in awake behaving rats (male, Sprague-Dawley) by activating or inhibiting this pathway spinally. Microdialysis fibres were implanted into the dorsal horn to infuse drugs directly to the spinal cord. 2 Animals, without peripheral tissue injury, were tested for responses to repeated applications (10 trials…	Excluded
Contribution of alpha(2) receptor subtypes to nerve injury-induced pain and its regulation by dexmedetomidine	1 There is evidence that noradrenaline contributes to the development and maintenance of neuropathic pain produced by trauma to a peripheral nerve. It is, however, unclear which subtype(s) of alpha adrenergic receptors (AR) may be involved. In addition to pro-nociceptive actions of AR stimulation, alpha (2) AR agonists produce antinociceptive effects. 2 Here we studied the contribution of the alp…	Included
Role of 20-hydroxyeicosatetraenoic acid in altering vascular reactivity in diabetes	1 This study examined the role of 20-hydroxyeicosatetraenoic (20-HETE) in altering vascular function in streptozotocin (STZ)-induced diabetic rats. 2 The expression of CYP4A protein and the formation of 20-HETE were elevated in the kidney, but not in the renal or mesenteric vasculature, of diabetic animals. The vasoconstrictor responses to norepinephrine (NE), endothelin-1 (ET-1), and angiotensin…	Excluded
Meta-chlorophenylpiperazine attenuates formalin-induced nociceptive responses through 5-HT1/2 receptors in both normal and diabetic mice	1 This study was designed to investigate the effect of meta-chlorophenylpiperazine (m-CPP; a 5-hydroxytryptamine (5-HT) receptor agonist) on the formalin-induced nociceptive responses in normal, insulin-dependent streptozotocin (STZ) diabetic and non-insulin dependent genetically diabetic (db/db) mice. 2 A subcutaneous injection of diluted formalin (1% formaldehyde in 0.9% saline, 10 mu l) under …	Excluded
Meta-chlorophenylpiperazine attenuates formalin-induced nociceptive responses through 5-HT-1/2 receptors in both normal and diabetic mice	1 This study was designed to investigate the effect of meta-chlorophenylpiperazine (m-CPP; a 5-hydroxytryptamine (5-HT) receptor agonist) on the formalin-induced nociceptive responses in normal, insulin-dependent streptozotocin (STZ) diabetic and non-insulin dependent genetically diabetic (db/db) mice. 2 A subcutaneous injection of diluted formalin (1% formaldehyde in 0.9% saline, 10 mu-l) under …	Excluded
Role of descending noradrenergic system and spinal alpha(2)-adrenergic receptors in the effects of gabapentin on thermal and mechanical nociception after partial nerve injury in the mouse	1 To gain further insight into the mechanisms underlying the antihyperalgesic and antiallodynic actions of gabapentin, a chronic pain model was prepared by partially ligating the sciatic nerve in mice. The mice then received systemic or local injections of gabapentin combined with either central noradrenaline (NA) depletion by 6-hydroxydopamine (6-OHDA) or alpha-adrenergic receptor blockade. 2 In…	Included
Antinociceptive properties of thyrotropin releasing hormone in mice: comparison with morphine	1 To investigate the antinociceptive activity of thyrotropin releasing hormone (TRH) in mice, different nociceptive stimuli were used. TRH (i.p.) was active in the phenyl-p-benzoquinone or acetic acid-induced writhing tests (chemical stimuli) and in Haffner's test (mechanical stimulus); its action decreased rapidly 15 min after intraperitoneal injection. 2 To determine whether the activity of TRH…	Excluded
Investigation into the role of P2X(3)/P2X(2/3) receptors in neuropathic pain following chronic constriction injury in the rat: an electrophysiological study	1 Two P2X(3)/P2X(2/3) receptor antagonists with different potencies were profiled electrophysiologically in a rat model of nerve injury. 2 A-317491 has poor CNS penetrance (blood: brain, 1 : < 0.05), and was therefore administered intravenously in chronic constriction injury (CCI)- and sham-operated rats to study the involvement of P2X(3) subunit-containing receptors in the periphery in neuropath…	Included
Distribution and regulation of cyclooxygenase-2 in carrageenan-induced inflammation	1 We characterized the regulation of cyclooxygenase-2 (COX-2) at the mRNA, protein and mediator level in two rat models of acute inflammation, carrageenan-induced paw oedema and mechanical hyperalgesia. 2 Carrageenan was injected in the hind paw of rat at low (paw oedema) and high doses (hyperalgesia). COX-2 and prostaglandin E2 (PGE2) levels were measured by RT-PCR and immunological assays. We a…	Excluded
Effects of intrathecal administration of nitric oxide synthase inhibitors on carrageenan-induced thermal hyperalgesia	1 We examined the effects of various nitric oxide synthase (NOS) inhibitors on carrageenan-induced thermal hyperalgesia. 2 First, we determined the time Feint at which a subcutaneous plantar injection of carrageenan into the rat hindpaw produced maximum thermal hyperalgesia. Subsequently, we demonstrated that intrathecal administration of the non-selective NOS inhibitor L-N-G-nitro-arginine methy…	Excluded
Absence of prostaglandin E-2-induced hyperalgesia in NMDA receptor epsilon subunit knockout mice	1 We have previously found that intrathecal administration of prostaglandins E-2 (PGE(2)) and D-2 (PGD(2)) into conscious mice induced hyperalgesia by the hut plate test, The present study investigated the involvement of N-methyl-D-aspartate (NMDA) receptor in the prostaglandin-induced hyperalgesia by use of mice lacking NMDA receptor epsilon 1, epsilon 4, Or epsilon 1/epsilon 4 subunits, 2 PGE(2…	Excluded
Effects of A-317491, a novel and selective P2X(3)/P2X(2/3) receptor antagonist, on neuropathic, inflammatory and chemogenic nociception following intrathecal and intraplantar administration	1 We have recently reported that systemic delivery of A-317491, the first non-nucleotide antagonist that has high affinity and selectivity for blocking P2X(3) homomeric and P2X(2/3) heteromeric channels, is antinociceptive in rat models of chronic inflammatory and neuropathic pain. In an effort to further evaluate the role of P2X(3)/P2X(2/3) receptors in nociceptive transmission, A-317491 was adm…	Included
Stimulation of nitric oxide release from rat spinal cord by prostaglandin E-2	1 We recently demonstrated that intrathecal administration of prostaglandin E-2 (PGE(2)) and PGF(2 alpha) induced allodynia through a pathway that includes the glutamate receptor and nitric oxide (NO)-generating systems from pharmacological studies. In order to clarify the involvement of NO in prostaglandin-induced allodynia, we measured NO released from rat spinal curd slices by a chemiluminesce…	Excluded
Inhibition of nociceptin-induced allodynia in conscious mice by prostaglandin D-2	1 We recently showed that intrathecal administration of nociceptin induced allodynia by innocuous tactile stimuli and hyperalgesia by noxious thermal stimuli in conscious mice. In the present study, we examined the effect of prostaglandins on nociceptin-induced allodynia and hyperalgesia. 2 Prostaglandin D-2 (PGD(2)) blocked the allodynia induced by nociceptin in a dose-dependent manner with an I…	Excluded
Actions of the FAAH inhibitor URB597 in neuropathic and inflammatory chronic pain models	1 While cannabinoid receptor agonists have analgesic activity in chronic pain states, they produce a spectrum of central CB1 receptor-mediated motor and psychotropic side effects. The actions of endocannabinoids, such as anandamide are terminated by removal from the extracellular space, then subsequent enzymatic degradation by fatty-acid amide hydrolase ( FAAH). In the present study, we compared …	Included
Differential Effects of Nociceptin/Orphanin FQ (NOP) Receptor Agonists in Acute versus Chronic Pain: Studies with Bifunctional NOP/mu Receptor Agonists in the Sciatic Nerve Ligation Chronic Pain Model in Mice	1-(1-Cyclooctylpiperidin-4-yl)-indolin-2-one (SR14150) and 1-(1-(2,3,3a,4,5,6-hexahydro-1H-phenalen-1-yl)piperidinl-4-yl)-indolin-2-one (SR16835) are moderately selective nociceptin/orphanin FQ (NOP) receptor agonists. In the [(35)S] guanosine 5'-O-(3-thiotriphosphate) assay in vitro, SR14150 is a partial agonist at both the NOP and mu-opioid receptors, whereas SR16835 is a full agonist at the NO…	Included
The effect of 1,3-dinitrobenzene on the functioning of the auditory pathway in the rat	1, 3-dinitrobenzene (DNB) has previously been shown to be neuropathic, causing gliovascular lesioning in the rat brainstem, with the nuclei of the auditory pathway being particularly affected. Lesion severity was shown to be dependent on functional activity, which could be markedly decreased within one pathway by monaurally reducing sensory input. The aim of this study was to characterise the cha…	Excluded
SUPPRESSION OF INFLAMMATORY AND NEUROPATHIC PAIN BY CT-3: SITE OF ACTION AND MOLECULAR MECHANISMS	1,1-Dimethylheptyl-delta-8-THC-11-oic acid (CT-3 or ajulemic acid) is a potent analog of THC-11-oic acid (the metabolite of THC). The apparent lack of psychotropic effects of CT-3 makes it an attractive candidate for therapeutic development. Here we extended the characterization of CT-3 to models of chronic inflammatory pain and neuropathic pain in rats, and investigated the mechanisms that contr…	Excluded
Effects of 1,3,5-Trinitrobenzene on cytotoxicity and metabolic activity of type I astrocytes of rats	1,3,5-Trinitrobenzene (TNB) is a munitions chemical that causes gliovascular lesions in the brain stem of rats similar to those produced by thiamine deficiency and nitroaromatic compounds, including m-dinitrobenzene. To identify neuropathic indices of toxicity, the effects of varying concentrations (0 to 2 mM) of TNB on cytotoxicity and cellular metabolic activity were examined using cultured ast…	Excluded
Effects of 1,3,5-trinitrobenzene on cytotoxicity and metabolic activity of type I astrocytes of rats	1,3,5-Trinitrobenzene (TNB) is a munitions chemical that causes gliovascular lesions in the brain stem of rats similar to those produced by thiamine deficiency and nitroaromatic compounds, including m-dinitrobenzene. To identify neuropathic indices of toxicity, the effects of varying concentrations (0 to 2 mM) of TNB on cytotoxicity and cellular metabolic activity were examined using cultured ast…	Excluded
1-Aryl-3-(1-acylpiperidin-4-yl)urea inhibitors of human and murine soluble epoxide hydrolase: structure-activity relationships, pharmacokinetics, and reduction of inflammatory pain	1,3-Disubstituted ureas possessing a piperidyl moiety have been synthesized to investigate their structure-activity relationships as inhibitors of the human and murine soluble epoxide hydrolase (sEH). Oral administration of 13 1-aryl-3-(1-acylpiperidin-4-yl)urea inhibitors in mice revealed substantial improvements in pharmacokinetic parameters over previously reported 1-adamantylurea based inhibi…	Excluded
[Phe1psi(CH2-NH)Gly2]nociceptin-(1 - 13)-NH2 activation of an inward rectifier as a partial agonist of ORL1 receptors in rat periaqueductal gray	1. [Phe1psi(CH2-NH)Gly2]nociceptin-(1 - 13)-NH2 (Phepsi), a tridecapeptide analogue of orphanin FQ/nociceptin (OFQ/N), was introduced as a competitive antagonist of opioid receptor-like orphan receptor (ORL1) in guinea-pig ileum and mouse vas deferens preparations in vitro but was recently found to act as an agonist in vivo. 2. In the periaqueductal gray, a site enriched with both OFQ/N and ORL1 …	Excluded
High concentrations of commonly used drugs can inhibit the in vitro glucuronidation of bisphenol A and nonylphenol in rats	1. 4-n-Nonylphenol and bisphenol A are endocrine disrupting chemicals that are mainly detoxified through glucuronidation. A factor that may modulate their glucuronidation rates is co-exposure to pharmaceuticals.2. This study aimed to identify and characterize the potential metabolic interactions between 14 drugs and these two endocrine disruptors.3. Nonylphenol and bisphenol A were co-incubated i…	Excluded
Neurogenic hyperalgesia: the search for the primary cutaneous afferent fibers that contribute to capsaicin-induced pain and hyperalgesia	1. A local cutaneous injury can produce primary hyperalgesia within the injured area and secondary hyperalgesia in the normal surrounding skin. An intradermal injection of capsaicin in humans causes intense pain and hyperalgesia to heat and to mechanical stimuli in the surrounding skin. Psychophysical studies in humans supported the conclusions that the hyperalgesia was predominantly the secondar…	Excluded
Spike-evoked suppression and burst patterning in dorsal root ganglion neurons of the rat	1. A low level of spontaneous impulse discharge is generated within dorsal root ganglia (DRGs) in intact animals, and this activity is enhanced following nerve injury. Many physiological stimuli present in vivo are capable of augmenting this ectopic discharge. Whatever their cause, episodes of sharply accelerated DRG firing tend to be followed by 'after-suppression' during which discharge falls b…	Excluded
Enzymes involved in adenosine metabolism in rat white and brown adipocytes. Effects of streptozotocin-diabetes, hypothyroidism, age and sex differences	1. Adipocytes were isolated from epididymal white fat and interscapular brown fat of male rats, and activities of 5'-nucleotidase, adenosine deaminase and adenosine kinase were measured in cell extracts. 2. 5'-Nucleotidase activity in white adipocytes was increased in streptozotocin-diabetes, decreased in hypothyroidism and increased with age. That activity in brown adipocytes was unchanged in di…	Excluded
Actions of the endocannabinoid transport inhibitor AM404 in neuropathic and inflammatory pain models	1. Although cannabinoid receptor agonists have analgesic activity in chronic pain states, they produce a spectrum of central cannabinoid CB1 receptor-mediated motor and psychotropic side-effects. The actions of endocannabinoids, such as anandamide, are terminated by uptake and subsequent intracellular enzymatic degradation. In the present study, we examined the effect of acute administration of t…	Included
Antinociceptive interactions between anandamide and endomorphin-1 at the spinal level	1. Although it is well known that the combined administration of synthetic or plant-originated opioids with cannabinoids (CB) results in synergistic antinociception, the effects of combined administration of endogenous ligands acting at micro-opioid and CB receptors are not known. The aim of the present study was to determine the interaction between anandamide (AEA; a CB(1) receptor agonist) and …	Excluded
RESPONSES OF SPINOTHALAMIC TRACT NEURONS TO MECHANICAL AND THERMAL STIMULI IN AN EXPERIMENTAL-MODEL OF PERIPHERAL NEUROPATHY IN PRIMATES	1. An experimental peripheral neuropathy (EPN) was induced in three monkeys (Macaca fascicularis) by ligation of spinal nerve L7. Behavioral responses to innocuous mechanical stimuli were tested before and after the surgery. Two weeks after the nerve ligation, the activity of spinothalamic tract (STT) neurons was recorded on both sides of the spinal cord with the animal under general anesthesia. …	Included
Attenuation of reperfusion hyperalgesia in the rat by systemic administration of benzodiazepines	1. An investigation into whether reperfusion hyperalgesia is modulated by prior systemic administration of two benzodiazepine agonists (diazepam and chlordiazepoxide), and an antagonist (flumazenil) was conducted. 2. Transient ischaemia was induced in conscious rats by applying an inflatable tourniquet to the base of the tail; when the rats exhibited a co-ordinated escape response, the tourniquet…	Excluded
Potent analgesic effects of anticonvulsants on peripheral thermal nociception in rats	1. Anticonvulsant agents are commonly used to treat neuropathic pain conditions because of their effects on voltage- and ligand-gated channels in central pain pathways. However, their interaction with ion channels in peripheral pain pathways is poorly understood. Therefore, we studied the potential analgesic effects of commonly used anticonvulsant agents in peripheral nociception. 2. We injected …	Excluded
Is Fleming's lysozyme an analgesic agent? Experiments on mice	1. Antinociceptive activity of hen egg white lysozyme (Fleming's lysozyme) was determined against abdominal contractions provoked by irritants injected intraperitoneally into mice. Carrageenan (2 mg) (CA) injected with arachidonic acid (15 micrograms) (AA) or prostaglandins PGE1 or PGF2 alpha (0.04 ng), brewer's yeast (10 mg), caolin (10 mg), mepartricin (80 U) and phenylquinone (50 micrograms) w…	Excluded
STUDIES ON PULMONARY EDEMA : I. THE CONSEQUENCES OF BILATERAL CERVICAL VAGOTOMY IN THE RABBIT	1. Bilateral cervical vagotomy in rabbits soon leads to death, usually within 8 to 24 hours. 2. Gradually increasing dyspnea, crises with expulsion of frothy, serous or sanguineous fluid from the mouth and nose, and terminal asphyxia are the important clinical features. 3. Postmortem examination reveals severe acute pulmonary edema and congestion, variable amounts of bronchopneumonia, and evidenc…	Excluded
Sodium nonivamide acetate: a non-pungently antinociceptive capsaicin derivative with unusual anti-inflammatory properties	1. Bradykinin-induced vascular pain in conscious rats, hyperalgesia in the rat hind paw, rat hind paw edema induced by compound 48/80 and carrageenin and dye exudation induced by intraperitoneal injection of 0.7% acetic acid in mice were all inhibited by sodium nonivamide acetate (SNA). 2. Collagen and arachidonic acid-induced rabbit platelet aggregations were inhibited by SNA and capsaicin. In h…	Excluded
CONTRIBUTION OF EDEMA TO THE SENSITIZATION OF HIGH-THRESHOLD MECHANORECEPTORS OF THE GOAT PALATAL MUCOSA	1. Carrageenan has been shown to alter transduction capacities of high-threshold mechanoreceptors of the goat palatal mucosa. Assessments were made of the contributions of carrageenan-induced edema to the sensitization of mechanonociceptors (mechanically insensitive afferents) and intense pressure receptors of the palatal mucosa of the goat. The degree of edema was assessed by measurement of chan…	Excluded
The effects of testosterone or insulin treatment on contractile responses of the rat vas deferens following castration or streptozotocin-induced diabetes mellitus	1. Castration and streptozotocin-induced diabetes produce significant decreases in serum testosterone levels accompanied by decreased vas deferens weights, a decreased responsiveness to nerve stimulation, and altered contractile responses to carbachol and phenylephrine. 2. Treatment of castrated rats with testosterone for 8 weeks prevented the decreased vas deferens weights and contractile change…	Excluded
Postoperative analgesia induced by intrathecal neostigmine or bethanechol in rats	1. Cholinergic agonists and acetylcholinesterase inhibitors, such as neostigmine, produce a muscarinic receptor-mediated antinociception in several animal species that depends on activation of spinal cholinergic neurons. However, neostigmine causes antinociception in sheep only in the early, and not late, postoperative period. 2. In the present study, a model of postoperative pain was used to det…	Excluded
Dorsal root reflexes in articular afferents occur bilaterally in a chronic model of arthritis in rats	1. Chronic arthritis was produced in rats by the injection of incomplete Freund's adjuvant into one knee joint. By 3-5 days later the rats had developed unilateral swelling of the injected knee and demonstrated bilateral hyperalgesia to radiant heat stimuli applied to the foot. 2. In the same rats anesthetized 3-5 days after the injection, dorsal root reflexes could be recorded bilaterally from t…	Excluded
Quantitative characterization of a repeated acute joint inflammation model in rats	1. Chronic pain owing to arthritis is a major clinical problem worldwide. To study the underlying pathological mechanisms of chronic pain and the effectiveness of different treatments, a number of experimental models have been developed over the years. 2. We introduced a new subchronic inflammatory model by repeated unilateral administration of carrageenan into the ankle joint of rats, and invest…	Excluded
Curcumin-loaded poly(epsilon-caprolactone) nanofibres: diabetic wound dressing with anti-oxidant and anti-inflammatory properties	1. Curcumin is a naturally occurring poly-phenolic compound with a broad range of favourable biological functions, including anti-cancer, anti-oxidant and anti-inflammatory activities. The low bioavailability and in vivo stability of curcumin require the development of suitable carrier vehicles to deliver the molecule in a sustained manner at therapeutic levels. 2. In the present study, we invest…	Excluded
Discovery of curcumin, a component of golden spice, and its miraculous biological activities	1. Curcumin is the active ingredient of the dietary spice turmeric and has been consumed for medicinal purposes for thousands of years. Modern science has shown that curcumin modulates various signalling molecules, including inflammatory molecules, transcription factors, enzymes, protein kinases, protein reductases, carrier proteins, cell survival proteins, drug resistance proteins, adhesion mole…	Excluded
Cyclo-oxygenase-2 inhibition attenuates the progression of nephropathy in uninephrectomized diabetic rats	1. Cyclo-oxygenase (COX)-2 is involved in constitutive production of prostanoids in the kidney and plays a role in the control of renal function and morphology. Renal cortical COX-2 expression and function is increased in experimental models of diabetes (DM). However, pathophysiological roles of this phenomenon in the diabetic kidney have not been fully elucidated. To address this issue, we studi…	Excluded
Characterization of intestinal and hepatic P450 enzymes in cynomolgus monkeys with typical substrates and inhibitors for human P450 enzymes	1. Cynomolgus monkeys are widely used to predict human pharmacokinetic and/or toxic profiles in the drug developmental stage. Characterization of cynomolgus monkey P450s such as the mRNA expression level, substrate specificity, and inhibitor selectivity were conducted to provide helpful information in designing monkey in vivo studies and monkey-to-human extrapolation.2. The expression levels of 1…	Excluded
Pharmacokinetic characterization of decursinol derived from Angelica gigas Nakai in rats	1. Decursinol is a major coumarin derived from the roots of Angelica gigas and has various pharmacological effects against inflammation, angiogenesis, nociceptive pain and Alzheimer's disease. In vitro and in vivo studies were conducted to characterize the metabolism and pharmacokinetics of decursinol.2. Decursinol exhibited high stability to oxidative and glucuronic metabolism in human and rat l…	Excluded
Electrophysiological characterization of spinal neuronal response properties in anaesthetized rats after ligation of spinal nerves L5-L6	1. Despite a number of models of nerve injury, few studies have examined how peripheral nerve injury influences spinal somatosensory processing. 2. Ligation of two (L5-L6) of the three spinal nerves that form the sciatic nerve produces a partial denervation of the hindlimb. Following ligation, rats exhibited withdrawal responses to normally innocuous punctate mechanical and cooling stimuli (aceto…	Included
Biochemical and pharmacological profile of a tetrasubstituted furanone as a highly selective COX-2 inhibitor	1. DFU (5,5-dimethyl-3-(3-fluorophenyl)-4-(4-methylsulphonyl)phenyl-2(5H)-furan one) was identified as a novel orally active and highly selective cyclo-oxygenase-2 (COX-2) inhibitor. 2. In CHO cells stably transfected with human COX isozymes, DFU inhibited the arachidonic acid-dependent production of prostaglandin E2 (PGE2) with at least a 1,000 fold selectivity for COX-2 (IC50 = 41 +/- 14 nM) ov…	Excluded
The contribution of adrenoceptor subtype(s) in the renal vasculature of diabetic spontaneously hypertensive rats	1. Diabetes and hypertension are both associated with an increased risk of renal disease and are associated with neuropathies, which can cause defective autonomic control of major organs including the kidney. This study aimed to examine the alpha(1)-adrenoceptor subtype(s) involved in mediating adrenergically induced renal vasoconstriction in a rat model of diabetes and hypertension. 2. Male spon…	Excluded
Protective effects of bendazac lysine on diabetic peripheral neuropathy in streptozotocin-induced diabetic rats	1. Diabetic neuropathy is a many faceted complication of both type I and II diabetes. The aim of the present study was to investigate the effects of bendazac lysine (BDL), an anticataract drug, on experimental diabetic peripheral neuropathy (DPN) in rats. 2. Diabetes was induced in rats by intraperitoneal injection of 75 mg/kg streptozotocin (STZ) dissolved in 0.1 mol/L citrate buffer (pH 4.4). B…	Included
Effects of trolox on nerve dysfunction, thermal hyperalgesia and oxidative stress in experimental diabetic neuropathy	1. Diabetic neuropathy is one of the most common complications of diabetes and oxidative stress has been implicated to play a major role in its pathophysiology. 2. In the present study, we targeted oxidative stress using trolox, an anti-oxidant, in streptozotocin-induced diabetic neuropathy in rats. 3. Compared with control rats, diabetic rats showed significant deficits in motor nerve conduction…	Included
Oxcarbazepine antinociception in animals with inflammatory pain or painful diabetic neuropathy	1. Diabetic neuropathy is one of the most frequent complications of diabetes mellitus. However, the mechanisms underlying these disorders are not yet well defined and it has been reported that currently available analgesics have hardly any ameliorating effect on painful diabetic neuropathy. 2. The purpose of the present study was to evaluate the antinociceptive effect of oxcarbazepine (OCBZ), a k…	Included
Microtubule cytoskeleton involvement in muscarinic suppression of voltage-gated calcium channel current in guinea-pig ileal smooth muscle	1. Effects of agents, which affect microtubule polymerization-depolymerization cycle, on Ba2+ current (IBa) flowing through voltage-gated Ca2+ channels and carbachol (CCh)-induced sustained suppression of IBa were examined in whole-cell voltage-clamped smooth muscle cells of guinea-pig ileum. 2. offchicine (100 microM) and vinblastine (100 microM), microtubule depolymerizers, increased the ampitu…	Excluded
Role of histamine in rodent antinociception	1. Effects of substances which are able to alter brain histamine levels on the nociceptive threshold were investigated in mice and rats by means of tests inducing three different kinds of noxious stimuli: mechanical (paw pressure), chemical (abdominal constriction) and thermal (hot plate). 2. A wide range of i.c.v. doses of histamine 2HCl was studied. Relatively high dose were dose-dependently an…	Excluded
Antinociceptive and toxic effects of (+)-epibatidine oxalate attributable to nicotinic agonist activity	1. Epibatidine is an analgesic substance, isolated from the skin of the poisonous frog Epipedobates tricolor, for which the mechanism of action was previously unknown. 2. The IC50 of synthetic (+)-epibatidine oxalate (the naturally occurring isomer) for [3H]-nicotine binding to rat whole-brain membranes was 0.1 nM. The (-)-isomer also exhibited high affinity (IC50 = 0.2 nM). 3. (+)- and (-)-Epiba…	Excluded
Effect of naproxen, a non-selective cyclo-oxygenase inhibitor, on pentylenetetrazol-induced kindling in mice	1. Epilepsy is one of the major neurological disorders of the brain, affecting approximately 0.5-1.0% of the population worldwide. Various neurotransmitter abnormalities, especially of GABA and glutamate, have been reported to play a key role in the pathophysiology of epilepsy. 2. Cyclo-oxygenase (COX) is the rate-limiting enzyme in the production of prostaglandins and, as such, is a key target f…	Excluded
alpha(1)-adrenoceptors in normal and hyperalgesic human skin	1. Evidence of an adrenergic component of cutaneous hyperalgesia has recently been obtained in animal models of painful peripheral neuropathy. These findings have prompted speculation that an increased density or sensitivity of peripheral alpha-adrenoceptors contributes to sensory abnormalities and chronic neuropathic pain in conditions such as reflex sympathetic dystrophy. However, it is not kno…	Excluded
CROSS-EXCITATION IN DORSAL-ROOT GANGLIA OF NERVE-INJURED AND INTACT RATS	1. Experiments based on teased fiber recording from rat sciatic nerve have shown that a small proportion of primary afferent neurons in intact dorsal root ganglia (DRGs) fire spontaneously. The prevalence of this discharge is substantially increased if the sciatic nerve has been chronically injured. 2. We now show that in most cases this ongoing DRG activity can be augmented by tetanic stimulatio…	Excluded
Modality-specific hyper-responsivity of regenerated cat cutaneous nociceptors	1. Experiments were performed on anaesthetized cats to investigate the receptive properties of regenerated cutaneous tibial nerve nociceptors, and to obtain evidence for coupling between them and other afferent fibres as being possible peripheral mechanisms involved in neuropathic pain. These properties were studied 6-7 months after nerve section and repair. 2. Recordings were made from 25 regene…	Excluded
Modulation of ultraviolet-induced hyperalgesia and cytokine upregulation by interleukins 10 and 13	1. Exposure to midrange ultraviolet radiation (UVB) is known to produce skin inflammation similar to sunburn. The aim of this study was to characterize the hyperalgesia and cytokine upregulation induced by UVB and their modulation by antiinflammatory cytokines. 2. Acute exposure of the dorsal skin of mice to UVB (200, 250 and 300 mJ cm(2)) resulted in a dose-dependent decrease in the latencies of…	Excluded
Co-activation of P2Y2 receptor and TRPV channel by ATP: implications for ATP induced pain	1. Extracellular ATP is recognized as a peripheral modulator of pain. Activation of ionotropic P2X receptors in sensory neurons has been implicated in induction of pain, whereas metabotropic P2Y receptors in potentiation of pain induced by chemical or physical stimuli via capsaicin sensitive TRPV1 channel. Here we report that P2Y2 receptor activation by ATP can activate the TRPV1 channel in absen…	Excluded
An electrophysiological study of dorsal horn neurons in the spinal cord of rats with an experimental peripheral neuropathy	1. Extracellular single-unit recordings have been made from 295 dorsal horn neurons in the lumbar enlargement of rat spinal cord; 191 neurons in 20 rats with an experimental peripheral neuropathy, and 104 in 10 sham-operated rats. Recordings were made 9-11 days after inducing the neuropathy by tying four loose ligatures around the sciatic nerve in the nerve-injured rats or performing a sham proce…	Included
Tranilast inhibits the proliferation, chemotaxis and tube formation of human microvascular endothelial cells in vitro and angiogenesis in vivo	1. First developed as an antiallergic drug, tranilast inhibits chemical mediator release from mast cells. In the present study, we examine the effects of tranilast on angiogenesis in vitro and in vivo and discuss the application of tranilast for angiogenic diseases. 2. Tranilast inhibited significantly the proliferation (IC50: 136 microM, 95% confidence limits: 134-137 microM) and vascular endoth…	Excluded
Calcineurin inhibitors exert rapid reduction of inflammatory pain in rat adjuvant-induced arthritis	1. FK506 and cyclosporin A (CsA) are immunosuppressive drugs, that specifically inhibit T-cell activation via calcineurin inhibition. This study was undertaken to investigate whether calcineurin inhibitors exert analgesic actions in rat adjuvant-induced arthritis (AIA), an animal model of rheumatoid arthritis (RA). 2. AIA was induced in female Lewis rats. Single doses of FK506 and CsA were orally…	Excluded
Differential roles of neurokinin 1 and neurokinin 2 receptors in the development and maintenance of heat hyperalgesia induced by acute inflammation	1. Following induction of acute inflammation by intraarticular injection of kaolin and carrageenan into the knee joint in rats, there was a significant decrease in the withdrawal latency to radiant heat applied to the paw (i.e. heat hyperalgesia), an increased joint circumference and increased joint temperature. 2. A neurokinin1 (NK1) receptor antagonist (CP-99,994, 10 mM) had no effect on the pa…	Excluded
N-Methyl-D-aspartate receptor modulators block hyperalgesia induced by acute low-dose morphine	1. Following opioid-induced antinociception in mice, hyperalgesic responses may be observed. The present study was designed to evaluate the effect of different N-methyl-D-aspartate (NMDA) receptor modulators (magnesium, dextromethorphan, D-serine) on the development of morphine-induced hyperalgesia in mice. The tail-flick test was used to assess the effects of morphine alone and in combination wi…	Excluded
Anterior pretectal nucleus facilitation of superficial dorsal horn neurones and modulation of deafferentation pain in the rat	1. Functional relationships between the anterior pretectal nucleus (APTN) and nociceptive dorsal horn neurones were investigated electrophysiologically in the anaesthetized rat. The effects of APTN lesions were assessed behaviourally in a model of deafferentation pain. 2. Cells in the dorsal and rostral parts of the APTN were excited orthodromically by electrical stimulation of the ipsilateral do…	Excluded
Functional reorganization of sensory pathways in the rat spinal dorsal horn following peripheral nerve injury	1. Functional reorganization of sensory pathways in the rat spinal dorsal horn following sciatic nerve transection was examined using spinal cord slices with an attached dorsal root. Slices were obtained from animals whose sciatic nerve had been transected 2-4 weeks previously and compared to sham-operated controls. 2. Whole-cell recordings from substantia gelatinosa neurones in sham-operated rat…	Included
Gabapentin (neurontin) and S-(+)-3-isobutylgaba represent a novel class of selective antihyperalgesic agents	1. Gabapentin (neurontin) is a novel antiepileptic agent that binds to the alpha 2 delta subunit of voltage-dependent calcium channels. The only other compound known to possess affinity for this recognition site is the (S)-(+)-enantiomer of 3-isobutylgaba. However, the corresponding (R)-(-)-enantiomer is 10 fold weaker. The present study evaluates the activity of gabapentin and the two enantiomer…	Excluded
Gastroprotective effects of the insulin sensitizers rosiglitazone and metformin against indomethacin-induced gastric ulcers in Type 2 diabetic rats	1. Gastric ulcers are common in Type 2 diabetic patients. Of all drugs used in the treatment of Type 2 diabetes, the insulin sensitizers thiazolidinediones (e.g. rosiglitazone) and metformin exhibit additional effects in ameliorating oxidative stress and inflammation, rendering them attractive candidates for the prevention of gastric ulcer in Type 2 diabetes. Thus, the aim of the present study wa…	Excluded
STUDIES ON PULMONARY EDEMA : II. THE PATHOGENESIS OF NEUROPATHIC PULMONARY EDEMA	1. Guinea pigs die shortly after bilateral cervical vagotomy, even when continuous artificial respiration effected through a tracheal cannula is carried out. Death is caused by severe pulmonary edema and congestion. 2. Direct observation of the lungs after bilateral vagotomy demonstrates that pulmonary edema develops gradually and increases slowly in amount and severity. Congestion precedes and a…	Excluded
Changes in adenosine sensitivity in the hippocampus of rats with streptozotocin-induced diabetes	1. Hippocampal slices have been used to assess the sensitivity of the CNS to adenosine and gamma-aminobutyric acid (GABA) in diabetes. The effects of adenosine, 2-chloroadenosine, GABA, muscimol and baclofen were studied on orthodromic synaptic potentials recorded in the CA1 region of slices taken from normal rats or animals made diabetic by the injection of streptozotocin. 2. In diabetic animals…	Excluded
Interaction of hydrogen sulfide with ion channels	1. Hydrogen sulfide (H(2)S) is a signalling gasotransmitter. It targets different ion channels and receptors, and fulfils its various roles in modulating the functions of different systems. However, the interaction of H(2)S with different types of ion channels and underlying molecular mechanisms has not been reviewed systematically. 2. H(2)S is the first identified endogenous gaseous opener of AT…	Excluded
Strong heat stimulation sensitizes the heat response as well as the bradykinin response of visceral polymodal receptors	1. Hyperalgesia after thermal injury is a common phenomenon, but its mechanism is poorly understood. As a step toward understanding the mechanism for heat sensitization, we searched conditions that would induce sensitization consistently and studied changes in polymodal receptors in their responses to heat (45 and 48 degrees C) and to bradykinin. Experiments were conducted in vitro, with the use …	Excluded
Reduction of Abeta42 in brains of transgenic APPswe mice by 2-3-chlorophenylaminophenylacetate	1. Imbalanced generation of the Abeta42 peptide from the amyloid beta protein precursor (APP) is implicated in the pathogenesis of Alzheimer's disease. 2. The present study is the first to evaluate the ability of 2-[3-chlorophenylamino]phenylacetic acid (GLY-230), a new drug in clinical development for the treatment of vascular complications of diabetes, to modulate Abeta42 levels in transgenic m…	Excluded
Expression of alpha(2)-adrenergic receptors in rat primary afferent neurones after peripheral nerve injury or inflammation	1. Immunocytochemistry with polyclonal antibodies directed against specific fragments of intracellular loops of alpha(2A)- and alpha(2C)-adrenergic receptors (alpha(2A)-AR, alpha(2C)-AR) was used to explore the possibility that expression of these receptors in dorsal root ganglion (DRG) neurones of rat alters as a result of peripheral nerve injury or localized inflammation. 2. Small numbers of ne…	Included
Unravelling the pathophysiology of complex regional pain syndrome: Focus on sympathetically maintained pain	1. In diseases such as complex regional pain syndrome (CRPS), where neuropathic pain is the primary concern, traditional pain classifications and lesion descriptors are of limited value. To obtain better treatment outcomes for patients, the underlying pathophysiological mechanisms of neuropathic pain need to be elucidated and analysed so that therapeutic targets can be identified and specific tre…	Excluded
BRADYKININ-INDUCED MODULATION OF THE RESPONSE BEHAVIOR OF DIFFERENT TYPES OF FELINE GROUP III AND IV MUSCLE RECEPTORS	1. In order to test the hypothesis that bradykinin has a sensitizing action on muscle receptors (e.g. during a myositis), the response properties of single group III and IV afferent units from the cat gastrocnemius-soleus muscle were compared before and after infiltration of their receptive fields with a bradykinin solution. According to their responses to graded natural stimuli (local pressure, …	Excluded
Bradykinin-induced modulation of the response behaviour of different types of feline group III and IV muscle receptors	1. In order to test the hypothesis that bradykinin has a sensitizing action on muscle receptors (e.g. during a myositis), the response properties of single group III and IV afferent units from the cat gastrocnemius-soleus muscle were compared before and after infiltration of their receptive fields with a bradykinin solution. According to their responses to graded natural stimuli (local pressure, …	Excluded
Nerve growth factor inducer, 4-methyl catechol, potentiates central sensitization associated with acceleration of spinal glutamate release after mustard oil paw injection in rats	1. In rats, injection of mustard oil (MO) into the paw caused a gradual increase in flinching of the injected paw and this algogenic behavior corresponded with an increase in the CSF-Glu level. 2. The nerve growth factor (NGF) inducer, 4-methyl catechol (4MC), enhanced the frequency of flinching and this effect was dose dependent. In addition, spinal CSF-Glu release was significantly above baseli…	Excluded
BACLOFEN REVERSES THE HYPERSENSITIVITY OF DORSAL HORN WIDE DYNAMIC-RANGE NEURONS TO MECHANICAL STIMULATION AFTER TRANSIENT SPINAL-CORD ISCHEMIA - IMPLICATIONS FOR A TONIC GABAERGIC INHIBITORY CONTROL OF MYELINATED FIBER INPUT	1. In the companion paper, we described a state of hypersensitivity that developed in dorsal horn wide dynamic range (WDR) neurons in rats after transient spinal cord ischemia. Thus the WDR neurons exhibited lower threshold and increased responses to low-intensity mechanical stimuli. The response pattern of these neurons to suprathreshold electrical stimulation was also changed. Notably, the resp…	Excluded
Adrenergic and opioidergic modulation of a spinal reflex in the decerebrated rabbit	1. In the decerebrated and spinalized rabbit, electrical stimulation of the sural nerve evokes a short-latency reflex in the ipsilateral ankle extensor gastrocnemius medialis (GM) which is tonically suppressed by endogenous opioids. In the present study we have investigated the inhibitory influences affecting this reflex in non-spinalized, decerebrated rabbits. 2. In non-spinalized rabbits, the t…	Excluded
Evidence that nitric oxide- and opioid-containing interneurons innervate vessels in the dorsal horn of the spinal cord of rats	1. In the dorsal horn of the spinal cord, activation of small fibre nociceptive afferents leads to the release of nitric oxide and enkephalins by interneurons. In this work we encountered unexpected relationships among local spinal cord dorsal horn blood flow, specific forms of afferent input, nitric oxide and intrinsic opioids. 2. Selective rises in rat lumbar dorsal cord blood flow using laser …	Excluded
The effect of 15-HPETE on airway responsiveness and pulmonary cell recruitment in rabbits	1. In the present study we have investigated the effect of 15-hydroperoxyeicosatetraenoic acid (15-HPETE) and 15-hydroxyeicosatetraenoic acid (15-HETE) on airway responsiveness to inhaled histamine in rabbits in vivo. 2. 15-HPETE increased airway responsiveness to histamine 24 h after tracheal instillation and this was associated with a cellular infiltration consisting mainly of neutrophils, as m…	Excluded
The anti-diabetic drug miglitol is protective against anginal ischaemia through a mechanism independent of regional myocardial blood flow in the dog	1. In the present study, we attempted to clarify whether the antidiabetic drug miglitol, an alpha-glucosidase inhibitor, has a protective effect against anginal ischaemia. We had reported previously that miglitol reduces myocardial infarct size through inhibition of glycogenolysis during ischaemia in rabbits. However, the effect of miglitol on anginal ischaemia remains unknown. 2. In open-chest b…	Excluded
Peripheral and centrally mediated effects of insulin on small intestinal transit in healthy mice	1. Insulin is the drug of choice in the management of type 1 diabetes mellitus. Approximately 76% of diabetic patients suffer from gastrointestinal disorders. An important area of investigating the inherent effect of insulin on small intestinal transit (SIT) remains unexplored. Hence, the present study was planned to investigate the effects of insulin (2 x 10(-6), 2 x 10(-3) and 2 U/kg) on small …	Excluded
The involvement of bradykinin B1 and B2 receptor mechanisms in cytokine-induced mechanical hyperalgesia in the rat	1. Interleukin-1 beta (IL-1 beta), IL-2 and IL-8 induced a mechanical hyperalgesia following intra-articular (i.artic.) injection into rat knee joints, whereas IL-6 and tumour necrosis factor alpha (TNF-alpha) were without effect. 2. Co-administration of IL-1 receptor antagonist (0.1 micrograms) with IL-1 beta (1 mu), IL-2 (10 mu) or IL-8 (0.1 mu) prevented the subsequent development of the hyper…	Excluded
The contribution of NMDA receptor activation to spinal c-Fos expression in a model of inflammatory pain	1. Intraplantar carrageenin (6 mg 150 microliters-1) evoked a high level of spinal c-Fos expression in the dorsal horn, of segments L4-L5 of the spinal cord, and an extensive peripheral oedema; both parameters were assessed 3 h after carrageenin. 2. Two series of experiments were performed, with the mean total number of Fos like-immunoreactive neurones (Fos-LI), after carrageenin, not being signi…	Excluded
Involvement of interleukin-1 beta, nerve growth factor and prostaglandin E2 in endotoxin-induced localized inflammatory hyperalgesia	1. Intraplantar endotoxin (ET) injection (1.25 micrograms) into the hind paw of rats resulted in a localized inflammatory hyperalgesia, as assessed by paw pressure (PP), paw immersion (PI), tail flick (TF) and hot plate (HP) tests. 2. ET injection resulted in a significant elevation in the levels of interleukin-1 beta (IL-1 beta) and nerve growth factor (NGF) in the injected foot as compared with…	Excluded
L-leucyl-L-arginine, naltrindole and D-arginine block antinociception elicited by L-arginine in mice with carrageenin-induced hyperalgesia	1. Intraplantar injection of carrageenin into the mouse hind paw produced hyperalgesia when measured by the paw pressure test (Randall & Selitto method). 2. Subcutaneous administration of L-arginine (100-1,000 mg kg-1), a possible precursor of kyotorphin which is an endogenous analgesic neuropeptide, inhibited carrageenin-induced hyperalgesia in a dose-dependent manner. This effect was blocked by…	Excluded
INVOLVEMENT OF NEUROKININ RECEPTORS IN THE INDUCTION BUT NOT THE MAINTENANCE OF MECHANICAL ALLODYNIA IN RAT FLEXOR MOTONEURONS	1. Intrathecal (I.T) injections of the (tachykinin) NK1 receptor agonist, substance P methyl ester (SPME; 20 pmol), or the NK2 receptor agonist, neurokinin A (NKA; 20 pmol), substantially decreased the cutaneous mechanical threshold and markedly enhanced the touch-evoked response of posterior biceps femoris-semitendinosus (PBF-ST) spinal flexor motoneurones in decerebrate-spinal rats. This cutane…	Excluded
Characterization of nociceptin hyperalgesia and allodynia in conscious mice	1. Intrathecal (i.t.) administration of nociceptin and high doses of morphine induced allodynia in response to innocuous tactile stimuli, and i.t. nociceptin evoked hyperalgesia in response to noxious thermal stimuli in conscious mice. Here we have characterized the nociceptin-induced allodynia and compared it with the morphine-induced allodynia and the nociceptin-evoked hyperalgesia. 2. Nocicept…	Excluded
Characterization of EP-receptor subtypes involved in allodynia and hyperalgesia induced by intrathecal administration of prostaglandin E-2 to mice	1. Intrathecal (i.t.) administration of prostaglandin E-2 (PGE-2) to conscious mice induced allodynia, a state of discomfort and pain evoked by innocuous tactile stimuli, and hyperalgesia as assessed by the hot plate test. We characterized prostaglandin E receptor subtypes (EP-1-3) involved in these sensory disorders by use of 7 synthetic prostanoid analogues. 2. Sulprostone (EP-1 lt EP-3) induce…	Excluded
Blockade by ONO-NT-012, a unique prostanoid analogue, of prostaglandin E-2-induced allodynia in conscious mice	1. Intrathecal (i.t.) administration of prostaglandin E-2 (PGE-2) to conscious mice was reported to induce allodynia, a state of discomfort and pain evoked by innocuous tactile stimuli through prostaglandin E receptor subtype EP-1 and hyperalgesia through prostaglandin E receptor subtypes EP-2 and/or EP-3. In the present study, we investigated the effects of an EP-1 antagonist on these sensory di…	Excluded
Involvement of neurokinin receptors in the induction but not the maintenance of mechanical allodynia in rat flexor motoneurones	1. Intrathecal (I.T.) injections of the (tachykinin) NK-1 receptor agonist, substance P methyl ester (SPME; 20 pmol), or the NK-2 receptor agonist, neurokinin A (NKA; 20 pmol), substantially decreased the cutaneous mechanical threshold and markedly enhanced the touch-evoked response of posterior biceps femoris-semitendinosus (PBF-ST) spinal flexor motoneurones in decerebrate-spinal rats. This cut…	Excluded
Behavioural testing and histological assessments of rabbit spinal cord following intrathecal administration of ondansetron	1. Intrathecal injection of ondansetron has the potential to reduce opioid-related side-effects. The aim of the present study was to determine whether this route of administration produces neuraxial injury. 2. Adult, non-pregnant female New Zealand white rabbits received a single bolus injection of a low (40 microg) or high (4.0 mg) dose of ondansetron into the intrathecal space between the 4th a…	Excluded
Renal vascular responsiveness to arachidonic acid in experimental diabetes	1. Isolated perfused kidneys from diabetic rats (duration 4-6 and 20-24 weeks) were more sensitive to the vasoconstrictor effects of arachidonic acid than kidneys from age-matched control rats. Sensitivity diminished with age in both control and diabetic groups. 2. The enhanced vasoconstrictor effect of arachidonic acid in diabetic rat kidneys was associated with increased conversion to prostagla…	Excluded
Alteration in the voltage dependence of NMDA receptor channels in rat dorsal horn neurones following peripheral inflammation	1. It has been proposed that the activation of NMDA receptors and upregulation of protein kinase C (PKC) underlie the exaggerated and persistent pain experienced in the inflammatory state, However, there is no direct evidence to show that inflammation alters the function of NMDA receptors. 2. We examined the voltage-dependent properties of NMDA receptor channels in rat dorsal horn neurotics that …	Excluded
Spinal mu-opioid receptor expression and hyperalgesia with dexamethasone in chronic adjuvant-induced arthritis in rats	1. It is known that inflammation influences peripheral and central mu-opioid receptor expression. Previous studies have indicated that glucocorticoids may influence the density of mu-opioid receptors. In the present study, we investigated the fluctuations of spinal mu-opioid receptor expression and hyperalgesia induced by complete Freund's adjuvant (CFA) under long-term administration of dexameth…	Excluded
Selective inhibitors of cyclo-oxygenase-2 (COX-2) induce hypoalgesia in a rat paw model of inflammation	1. It is well-established that inhibitors of cyclo-oxygenase (COX) and hence of prostaglandin (PG) biosynthesis reverse inflammatory hyperalgesia and oedema in both human and animal models of inflammatory pain. 2. Paw oedema and hyperalgesia in rats were induced by injecting carrageenan (250 micro g paw(-1)) into a hindpaw. Both inflammatory responses were followed for 24 h after the injection, m…	Excluded
ATP sensitive potassium channels: Potential drug targets in neuropsychopharmacology	1. K channels are a diverse and ubiquitous class of proteins that regulate a number of biological functions. 2. Ligands for the study of a variety of K channels are available. These include 'openers' and antagonists for the ATP sensitive K channel and peptide toxins such as apamin and charybdotoxin that block other subtypes. 3. Antagonists of the ATP sensitive K channel are useful in the treatmen…	Excluded
Thalamic stimulation-evoked sensations in chronic pain patients and in nonpain (movement disorder) patients	1. Little is known about the effect of central and peripheral nervous system injury on the processing of somatosensory information at the thalamic level in humans. The role of the human thalamic ventrocaudal nucleus (Vc) in nociception is not well understood because reports of nociceptive neuronal responses and stimulation-evoked pain are rare. In this study, we have characterized effects of micr…	Excluded
Comparison of alloxan and streptozotocin induced diabetes in rats: differential effects on microsomal drug metabolism	1. Liver microsomes from alloxan or streptozotocin diabetic rats displayed differential drug metabolizing abilities in vitro. 2. Only streptozotocin liver microsomes exhibited changes in the cytochrome P-450 normal spectral characteristics. 3. Overall testosterone metabolism was significantly increased in streptozotocin diabetic liver microsomes, whereas it was markedly decreased in alloxan diabe…	Excluded
LONG-TERM POTENTIATION IN AN ISOLATED PERIPHERAL NERVE-SPINAL CORD PREPARATION	1. Long-lasting increases in synaptic efficacy following repetitive stimulation have been demonstrated at several sites in the CNS, where they are collectively termed long-term potentiation (LTP). LTP is of interest with respect to its presumptive relationship to learning and memory in hippocampus. In the spinal cord in vivo, an LTP-Like phenomenon is thought to underlie the allodynia and hyperal…	Excluded
Release and effects of calcitonin gene-related peptide in myocardial ischaemia	1. Low pH and lactic acid perfusion evoke a reproducible, and concentration-dependent outflow of CGRP from the isolated heart. 2. PGI2 causes outflow of CGRP from the isolated heart. Furthermore, low pH perfusion causes release of PGI2, and cyclo-oxygenase inhibition attenuates not only this release of PGI2, but also the outflow of CGRP that is evoked by low pH perfusion, indicating that a portio…	Excluded
CEREBROSPINAL-FLUID LEVELS OF SUBSTANCE-P AND CALCITONIN-GENE-RELATED PEPTIDE - CORRELATION WITH SURAL NERVE LEVELS AND NEUROPATHIC SIGNS IN SENSORY DIABETIC POLYNEUROPATHY	1. Lumbar spinal substance P and calcitonin-gene-related peptide derive from spillage out of the dorsal horns associated with activity of small primary sensory afferents (C- and Adelta-fibres). Cerebrospinal fluid and sural nerve levels of substance P and calcitonin-gene-related peptide have been measured in patients with diabetic polyneuropathy to determine whether differences in small primary s…	Excluded
Interleukin-1 mimics the hyperalgesia induced by a factor obtained by macrophage lysis	1. Lysis of rat thioglycolate-stimulated peritoneal macrophages releases a low molecular weight factor (0.5 less than MW less than 10 kD) into the supernatant. Bilateral hyperalgesia was observed when this factor, denoted macrophage hyperalgesic factor (MHF), was injected into one hind paw or into the peritoneal cavity of the rat. 2. Similar activity was detected in stimulated peritoneal and tumo…	Excluded
Effects of administration of oral magnesium on plasma glucose and pathological changes in the aorta and pancreas of diabetic rats	1. Magnesium deficiency has recently been proposed as a novel factor implicated in the pathogenesis of the complications of diabetes. The purpose of the present study was to determine the relationship between oral Mg supplementation and changes in plasma glucose, calcium, haemoglobin, Ca/Mg ratio, blood pressure and the histology of the pancreas and vascular system in streptozotocin-induced diabe…	Excluded
Spinal cord SP release and hyperalgesia in monoarthritic rats: involvement of the GABAB receptor system	1. Monoarthritis was induced in Lewis rats by interdermal injection in the left hind paw of a suspension of Mycobacterium tubercolusis in mineral oil (500 micrograms 100 microliters-1). Controls were injected with 100 microliters mineral oil. 2. Withdrawal latencies to thermal stimuli of the inflamed paw, the contralateral and both paws of control rats were measured at daily intervals after injec…	Excluded
Pharmacological and biochemical actions of simple coumarins: natural products with therapeutic potential	1. More than 300 coumarins have been identified from natural sources, especially green plants. The pharmacological and biochemical properties and therapeutic applications of simple coumarins depend upon the pattern of substitution. More complex related compounds based on the coumarin nucleus include the dicoumarol/warfarin anticoagulants, aflatoxins and the psoralens (photosensitizing agents). 2.…	Excluded
Neuroexcitatory effects of morphine and hydromorphone: Evidence implicating the 3-glucuronide metabolites	1. Morphine is recommended by the World Health Organization as the drug of choice for the management of moderate to severe cancer pain. 2. Education of health professionals in the past decade has resulted in a large increase in the prescribing of opioids, such as morphine, and in the magnitude of the doses administered, resulting in an improvement in the quality of pain relief available for many …	Excluded
Opposite nociceptive effects of the arginine/NO/cGMP pathway stimulation in dermal and subcutaneous tissues	1. Nitric oxide has been described either as pronociceptive or antinociceptive. In this investigation, using an electronic pressure-metre, the intradermal and the subcutaneous effects of prostaglandin E(2) (PGE(2)) and agents that mimic or inhibit the arginine/NO/cGMP pathway were compared. 2. The hypernociceptive effect of the intradermal injection of PGE(2) (100 ng) was immediate, peaking withi…	Excluded
A comparison of the anti-inflammatory and anti-nociceptive activity of nitroaspirin and aspirin	1. Nitroaspirin (2.5 - 50 mg kg(-1), i.p. or 2.5 - 100 mg kg(-1), p.o.) and aspirin (2.5 - 100 mg kg(-1), i.p. or p.o.) exhibit anti-inflammatory activity in the carrageenan-induced hindpaw oedema model in the rat. When administered i.p., nitroaspirin was a more effective anti-oedema agent than aspirin particularly in the 'early' phase (i.e. up to 60 min) of the response. The ED(50) values for ni…	Excluded
Effects of a partial agonist and a full antagonist acting at the glycine site of the NMDA receptor on inflammation-induced mechanical hyperalgesia in rats	1. NMDA receptor antagonists have previously been shown to have antinociceptive effects in behavioural experiments, but controversy remains as to the role of NMDA receptors in mechanical hyperalgesia. We have studied the effects on mechanical nociceptive thresholds in rats with carrageenin-induced paw inflammation of L-687,414, a low efficacy partial agonist which acts as a functional antagonist …	Excluded
Studies with ketamine and alfentanil following Freund's complete adjuvant-induced inflammation in rats	1. N-Methyl-D-aspartate (NMDA) receptor antagonists suppress inflammatory hyperalgesia and the development of acute opioid tolerance. They may also enhance opioid-induced antinociception, while suppressing postopioid-induced hyperalgesia and opioid-enhanced inflammatory hyperalgesia.2. The non-competitive NMDA receptor antagonist, ketamine, is a racemic chiral drug; its individual enantiomers hav…	Excluded
Sodium currents in vagotomized primary afferent neurones of the rat	1. Nodose ganglion neurones (NGNs) become less excitable following section of the vagus; nerve. To determine the role of sodium currents (I-Na) in these changes, standard patch-clamp recording techniques were used to measure I-Na in rat NGNs maintained in vivo for 5-6 days following vagotomy, and then in vitro for 2-9 h. 2. Total I-Na and I-Na density in vagotomized NGNs were similar to control v…	Excluded
Endothelium-dependent relaxation and noradrenaline sensitivity in mesenteric resistance arteries of streptozotocin-induced diabetic rats	1. Noradrenaline sensitivity and acetylcholine-induced relaxation were investigated in mesenteric resistance arteries of control and streptozotocin-induced diabetic rats. 2. The diabetic rats demonstrated enhanced vascular sensitivity to noradrenaline compared with age-matched controls (pEC50 5.99 +/- 0.06 for diabetic rats, n = 25, versus 5.82 +/- 0.03 for controls, n = 45, P < 0.05). 3. Signifi…	Excluded
Modulation of formalin-evoked hyperalgesia by intrathecal N-type Ca channel and protein kinase C inhibitor in the rat	1. omega-CgTx attenuated formalin-evoked biphasic flinches, while PKC inhibitor (STU) attenuated phase 2 and was reversed by PDBu. 2. omega-CgTx and STU suppressed the increase in CSF-glutamate after formalin injection. 3. Morphine completely suppressed both increased flinching and CSF glutamate release. 4. Thus, omega-CgTx (N-type Ca channels) may regulate neurotransmitter release evoked by C fi…	Excluded
Interactions between metoclopramide and morphine: enhanced antinociception and motor dysfunction in rats	1. Opioid analgesics and anti-emetics are often used concomitantly to treat pain and nausea and vomiting in people with malignant disease. We investigated interactions between the opioid analgesic morphine and the anti-emetic metoclopramide, a dopamine D2 receptor antagonist, on nociception and gross motor function. 2. To assess for antinociceptive interactions, 11 Sprague-Dawley rats were inject…	Excluded
Orphanin FQ inhibits capsaicin-induced thermal nociception in monkeys by activation of peripheral ORL1 receptors	1. Orphanin FQ (OFQ), an endogenous peptide for ORL1 receptors, has been identified. Although the actions of OFQ have much in common with those of opioid peptides at the cellular level, behavioral studies in rodents seem conflicting. 2. The aim of this study was to investigate the potential pronociceptive or antinociceptive function of peripheral ORL1 receptors in primates. Experiments were condu…	Excluded
High-cholesterol diet augments endothelial dysfunction via elevated oxidative stress and reduced tetrahydrobiopterin in Ins2(Akita) mice, an autosomal dominant mutant type 1 diabetic model	1. Oxidative stress contributes to endothelial dysfunction and atherogenesis in diabetes. The present study tested the hypothesis that a high-cholesterol diet accelerates endothelial dysfunction in Ins2(Akita) mice, a Type 1 diabetic model with a spontaneous autosomal preproinsulin gene (Ins2 gene) mutation, through further increase of superoxide production. 2. The Ins2(Akita) diabetic mice were …	Excluded
Anti-inflammatory and analgesic effects of paeonol in carrageenan-evoked thermal hyperalgesia	1. Paeonol was tested for its anti-inflammatory and analgesic effects in a rat model of carrageenan-evoked thermal hyperalgesia. The possible mechanisms involved in these effects were also investigated. 2. Pre- and post-treatment with paeonol (30, 50 or 100 mg kg(-1), i.p.) dose-dependently inhibited the carrageenan-evoked thermal hyperalgesia. 3. Treatment with paeonol dose-dependently inhibited…	Excluded
THE CONTRIBUTION OF GABA(A) AND GLYCINE RECEPTORS TO CENTRAL SENSITIZATION - DISINHIBITION AND TOUCH-EVOKED ALLODYNIA IN THE SPINAL-CORD	1. Pain hypersensitivity is characterized by an increase in the response to noxious stimuli (hyperalgesia) and a reduction in threshold such that innocuous stimuli begin to elicit pain (allodynia). These sensitivity changes can be produced by an increase in excitability of dorsal horn neurons; the phenomenon of central sensitization. We have now examined whether a reduction in local segmental inh…	Excluded
Indirect muscarinic receptor activation by pentamidine on airway smooth muscle	1. Pentamidine is routinely used to reduce the incidence of Pneumocystis carinii pneumonia in patients infected with human immunodeficiency virus, but it has been described as inducing pulmonary adverse effects, such as cough and bronchospasm. 2. In this paper we have investigated the effects of pentamidine on guinea-pig isolated main bronchi and human isolated bronchi. Pentamidine induced a conc…	Excluded
Nerve growth factor NT-5 induce increased thermal sensitivity of cutaneous nociceptors in vitro	1. Perfusion of the receptive field (RF) of C- or A delta-fiber nociceptors with nerve growth factor (NGF) in an in vitro preparation of the rat saphenous nerve with functionally attached skin induced a significant decrease in heat threshold without changing mechanical or cold sensitivity. 2. NGF-induced thermal sensitization was absent after saline perfusion and in skin taken from mast-cell depl…	Excluded
Contribution of interleukin-1 beta to the inflammation-induced increase in nerve growth factor levels and inflammatory hyperalgesia	1. Peripheral inflammation is associated with the local production of neuroactive inflammatory cytokines and growth factors. These may contribute to inflammatory pain and hyperalgesia by directly or indirectly altering the function or chemical phenotype of responsive primary sensory neurones. 2. To investigate this, inflammation was produced by the intraplantar injection of complete Freund's adju…	Excluded
Cytokines, nerve growth factor and inflammatory hyperalgesia: the contribution of tumour necrosis factor alpha	1. Peripheral inflammation is characterized by heightened pain sensitivity. This hyperalgesia is the consequence of the release of inflammatory mediators, cytokines and growth factors. A key participant is the induction of the neurotrophin nerve growth factor (NGF) by interleukin-1 beta (IL-1 beta). 2. Tumour necrosis factor alpha (TNF alpha) has been shown both to produce hyperalgesia and to upr…	Excluded
ABNORMALITIES OF MECHANORECEPTORS IN A RAT MODEL OF NEUROPATHIC PAIN - POSSIBLE INVOLVEMENT IN MEDIATING MECHANICAL ALLODYNIA	1. Peripheral nerve injury sometimes leads to the development of neuropathic pain. One of the symptoms of such neuropathic pain is mechanical allodynia, pain in response to normally innocuous mechanical stimuli. We hypothesized that sympathetically driven dysfunction of cutaneous mechanoreceptors is responsible for signaling mechanical allodynia. The present study was undertaken to identify the t…	Included
Effect of peroxynitrite on plasma extravasation, microvascular blood flow and nociception in the rat	1. Peroxynitrite (ONOO-) is a cytotoxic species, formed by the reaction between nitric oxide and superoxide free radicals, that may be involved in inflammation. In this study we have investigated the effect of peroxynitrite on plasma extravasation and microvascular blood flow in the dorsal skin and on nociceptive responses in the hind paw of the rat. 2. Male Wistar rats were anaesthetized and the…	Excluded
Implication of cannabinoids in neurological diseases	1. Preparations from Cannabis sativa (marijuana) have been used for many centuries both medicinally and recreationally. 2. Recent advances in the knowledge of its pharmacological and chemical properties in the organism, mainly due to Delta(9)-tetrahydrocannabinol, and the physiological roles played by the endocannabinoids have opened up new strategies in the treatment of neurological and psychiat…	Excluded
Actions of specific adenosine receptor A1 and A2 agonists and antagonists in recovery of phrenic motor output following upper cervical spinal cord injury in adult rats	1. Previous studies from our laboratory have established that a latent respiratory motor pathway can be activated to restore function to a hemidiaphragm paralysed by upper cervical (C2) spinal cord hemisection during a reflex known as the 'crossed phrenic phenomenon'. In addition, theophylline, a general adenosine A1 and A2 receptor antagonist, can activate the latent pathway by acting centrally …	Excluded
Systemic pre-treatment with a group II mGlu agonist, LY379268, reduces hyperalgesia in vivo	1. Previous studies investigating the role of metabotropic glutamate (mGlu) receptors in nociceptive processing have been hampered by the lack of systemically active, selective, ligands. This study investigates the possible analgesic and/or anti-hyperalgesic properties of the most potent compound to date that has systemic agonist activity at group II mGlu receptors, LY379268. 2. In testing the dr…	Excluded
Characterization of prostanoid receptor-evoked responses in rat sensory neurones	1. Prostanoid receptor-mediated sensitization, or excitation, of sensory nerve fibres contributes to the generation of hyperalgesia. To characterize the prostanoid receptors present on sensory neurones, biochemical assays were performed on primary cultures of adult rat dorsal root ganglia (DRG) and the F-11 (embryonic rat DRG x neuroblastoma hybrid) cell line. 2. In DRG cultures, the IP receptor …	Excluded
RESPONSES OF SPINOTHALAMIC TRACT CELLS TO MECHANICAL AND THERMAL-STIMULATION OF SKIN IN RATS WITH EXPERIMENTAL PERIPHERAL NEUROPATHY	1. Responses of spinothalamic tract (STT) neurons to mechanical and thermal stimulation of skin were recorded under urethane and pentobarbital anesthesia in 12 control rats and in 20 rats with experimental neuropathy. Activity of the STT cells in neuropathic rats was recorded 7, 14, and 28 days after inducing the neuropathy by placing four loose ligatures on the sciatic nerve. 2. All neuropathic …	Included
Nociceptive neurons of the raccoon lateral thalamus	1. Responses to noxious mechanical and thermal stimuli were examined in 48 thalamic neurons in barbiturate or chloralose-anesthetized raccoons, with special attention to neurons whose peripheral receptive fields (RFs) included glabrous skin of the forepaw. Recording loci were in the core of the ventrobasal complex (VB; n = 32), its ventral or dorsal border (n = 5), or the medial division of the p…	Excluded
THE EFFECT OF PHORBOL ESTERS ON THE RESPONSES OF PRIMATE SPINOTHALAMIC NEURONS TO MECHANICAL AND THERMAL STIMULI	1. Sensitization of dorsal horn neurons is thought to play an important role in pain perception, secondary hyperalgesia, and allodynia. Recent experimental evidence suggests that the sensitization of dorsal horn neurons is induced by combined increased release of excitatory amino acids and peptides in the spinal cord dorsal horn from nociceptive primary afferents due to an injury-caused barrage o…	Excluded
The sensitization of high threshold mechanoreceptors with myelinated axons by repeated heating	1. Seventy high threshold mechanoreceptor units (HTMs) with myelinated axons were isolated from the sural nerves of cats and rabbits. Thirteen cat and forty-two rabbit HTMs were testec by controlled, repeated heating of the skin of the foot or lower leg to noxious levels. 2. Many of the units (77% in the cat and 40% in the rabbit) fired to heating. Only six (11%) of these fired to the first brief…	Excluded
Intra- and extraneuronal changes of immunofluorescence staining for TNF-alpha and TNFR1 in the dorsal root ganglia of rat peripheral neuropathic pain models	1. Several lines of evidence suggest that cytokines and their receptors are initiators of changes in the activity of dorsal root ganglia (DRG) neurons, but their cellular distribution is still very limited or controversial. Therefore, the goal of present study was to investigate immunohistochemical distribution of TNF-alpha and TNF receptor-1 (TNFR1) proteins in the rat DRG following three types …	Included
Pharmacokinetics and efficacy of structurally related spirohydantoin and spirosuccinimide aldose reductase inhibitors	1. Six potent aldose reductase inhibitors (ARI), three spirohydantoin (I to III) and three spirosuccinimide (IV to VI) compounds, showed similar IC50 activities in vitro for the inhibition of rat lens aldose reductase, but their ED50 values in diabetic rats varied as much as 20-fold in the lens and 50-fold in the sciatic nerve tissue. Pharmacokinetic studies were undertaken to investigate these f…	Excluded
In vitro prostanoid release from spinal cord following peripheral inflammation: effects of substance P, NMDA and capsaicin	1. Spinal prostanoids are implicated in the development of thermal hyperalgesia after peripheral injury, but the specific prostanoid species that are involved are presently unknown. The current study used an in vitro spinal superfusion model to investigate the effect of substance P (SP), N-methyl-d-aspartate (NMDA), and capsaicin on multiple prostanoid release from dorsal spinal cord of naive rat…	Excluded
The origin of acetylcholine released from guinea-pig intestine and longitudinal muscle strips	1. Strips of longitudinal muscle can be obtained from guinea-pig ileum either retaining or free from Auerbach's plexus.2. The denervated strip is unresponsive to electrical stimulation by brief shocks, whether given singly or in trains; it also fails to respond to nicotine or dimethylphenylpiperazinium iodide (DMPP), and eserine causes no spasm.3. Denervated strips neither contain detectable acet…	Excluded
Substance P and capsaicin-induced mechanical hyperalgesia in the rat knee joint; the involvement of bradykinin B1 and B2 receptors	1. Substance P (SP) and capsaicin induced a mechanical hyperalgesia when injected into rat knee joints. 2. The NK1 receptor antagonists CP 99994 (10-100 nmol) and RP 67580 (0.1-1 nmol) blocked the development of, and also reversed, SP-induced hyperalgesia. Capsaicin (10 nmol)-induced hyperalgesia was blocked by capsazepine (0.5-5 nmol). 3. Capsaicin-induced hyperalgesia was prevented and reversed…	Excluded
Adrenoreceptor subtype mediating sympathetic-sensory coupling in injured sensory neurons	1. Teased axon recordings were made from 167 spontaneously active A beta- and A delta-afferents that ended in sciatic nerve end neuromas of 6-12 days standing. When challenged with a standard bolus of systemically applied adrenaline, 100 (60%) responded, either with an increase in baseline firing frequency (excitation, 96/100) or with a decrease (suppression, 4/100). 2. Experiments using receptor…	Excluded
MODULATION OF ACTIVITY IN DORSAL-ROOT GANGLION NEURONS BY SYMPATHETIC ACTIVATION IN NERVE-INJURED RATS	1. Teased-fiber recordings were made from the axons of dorsal root ganglion (DRG) neurons in rats that underwent transection of the sciatic nerve 4-22 days previously. Many of the neurons had spontaneous ectopic discharge originating from within the DRG. 2. When postganglionic sympathetic efferents ending in the DRG were activated by tetanic stimulation of the T-13 and L(1) ventral roots (VRs), t…	Excluded
Antinociceptive activity of the tachykinin NK1 receptor antagonist, CP-99,994, in conscious gerbils	1. The ability of CP-99,994, and its less active enantiomer, CP-100,263, to inhibit spontaneous behaviours and hyperalgesia induced by central infusion of the NK1 receptor agonist, GR73632 or intraplantar injection of formalin was investigated in rats and gerbils. 2. GR73632 (3 pmol, i.c.v.)-induced foot tapping in gerbils was dose-dependently inhibited by CP-99,994 (0.1-1 mg kg-1, s.c.), but not…	Excluded
TRANSIENT SPINAL-CORD ISCHEMIA INDUCES TEMPORARY HYPERSENSITIVITY OF DORSAL HORN WIDE DYNAMIC-RANGE NEURONS TO MYELINATED, BUT NOT UNMYELINATED, FIBER INPUT	1. The activity of 197 single dorsal horn neurons was recorded extracellularly in the spinal cord of decerebrate, spinalized, unanesthetized rats. The response properties of 174 wide dynamic range (WDR) neurons to electrical, mechanical, and thermal stimulation in three groups of rats were studied: normal, 1-4 days after transient spinal cord ischemia induced photochemically by laser irradiation …	Excluded
ONSET OF A PAINFUL PERIPHERAL NEUROPATHY IN RAT - A PARTIAL AND DIFFERENTIAL DEAFFERENTATION AND SPONTANEOUS DISCHARGE IN A-BETA AND A-DELTA PRIMARY AFFERENT NEURONS	1. The activity of primary afferent axons was recorded in rats that had received a chronic constriction injury (CCI) to the common sciatic nerve. The CCI gives rise to a painful peripheral neuropathy that is characterized by allodynia, hyperalgesia, and, probably, spontaneous pain (or dysesthesia). In the majority of animals, these neuropathic pain symptoms begin 2 days postinjury; sciatic nerve …	Included
In vivo pathway of thermal hyperalgesia by intrathecal administration of alpha,beta-methylene ATP in mouse spinal cord: involvement of the glutamate-NMDA receptor system	1. The aim of the present study is to characterize the role of the P2X receptor in spinal nociceptive processing in vivo. We investigated the mechanisms of the P2X receptor agonist alpha,beta-methylene ATP (alpha,betameATP)-induced modulation of acute nociceptive signalling in mouse spinal cord. 2. Intrathecal administration of alpha,betameATP produced a significant and dose-dependent thermal hyp…	Excluded
Mitemcinal (GM-611), an orally active motilin receptor agonist, improves delayed gastric emptying in a canine model of diabetic gastroparesis	1. The aim of the present study was to evaluate the effects of mitemcinal (GM-611), an orally active motilin receptor agonist, on delayed gastric emptying in a canine model of diabetic gastroparesis and to compare these effects with those of cisapride.2. Moderate hyperglycaemia was induced by a single intravenous injection of a mixture of streptozotocin (30 mg/kg) and alloxan (50 mg/kg). Dogs tha…	Excluded
The effects of adenosine on isolated right atrial preparations from streptozotocin-diabetic rats	1. The aim of the present study was to investigate the inhibitory effects of adenosine on the contractile force and chronotropic action of isolated right atrial preparations from streptozotocin (STZ)-diabetic rats. 2. The rats were anaesthetized with diethyl ether and STZ (65 mg kg(-1)) was injected intravenously via the tail vein. 3. Adenosine produced concentration-dependent decreases in the fo…	Excluded
The pharmacology of excitatory and inhibitory amino acid-mediated events in the transmission and modulation of pain in the spinal cord	1. The aim of this review is to consider the relative roles of inhibitory and excitatory amino acid receptor-mediated events in the processes leading to pain transmission in the spinal cord. 2. Emphasis will be on the roles of the inhibitory and excitatory amino acids, GABA and glutamate, and how the relative balance between activity in these systems appears to determine the level of pain transmi…	Excluded
Effect of protein kinase C and phospholipase A2 inhibitors on the impaired ability of human diabetic platelets to cause vasodilation	1. The aim of this study was to examine the mechanism of impaired platelet-mediated endothelium-dependent vasodilation in diabetes. Exposure of human platelets to high glucose in vivo or in vitro impairs their ability to cause endothelium-dependent vasodilation. While previous data suggest that the mechanism for this involves increased activity of the cyclo-oxygenase pathway, the signal transduct…	Excluded
Identification of CYP3A4 and CYP2C8 as the major cytochrome P450 s responsible for morphine N-demethylation in human liver microsomes	1. The aim was to identify the cytochrome P450 (CYP) enzymes responsible for the N-demethylation of morphine in vitro. 2. In human liver microsomes, normorphine formation followed Michaelis-Menten kinetics with mean Km and Vmax of 12.4 +/- 2.2 mM and 1546 +/- 121 pmol min(-1) mg(-1), respectively. In microsomes from a panel of 14 human livers phenotyped for 10 CYP enzymes, morphine N-demethylatio…	Excluded
The effects of evening primrose oil on nerve function and capillarization in streptozotocin-diabetic rats: modulation by the cyclo-oxygenase inhibitor flurbiprofen	1. The aims of this study were first, to examine whether deficits in nerve conduction in streptozotocin-diabetic rats could be reversed by a 10% dietary supplement of evening primrose oil. Second, to determine the time-course of reversal, and third, to assess whether the effects could be blocked by the cyclo-oxygenase inhibitor flurbiprofen (5 mg kg-1 day-1). 2. One-month diabetes produced 20% an…	Excluded
Antinociceptive activity of CP-101,606, an NMDA receptor NR2B subunit antagonist	1. The analgesic activity of CP-101,606, an NR2B subunit-selective N-methyl-D-aspartate (NMDA) receptor antagonist, was examined in carrageenan-induced hyperalgesia, capsaicin- and 4beta-phorbol-12-myristate-13-acetate (PMA)-induced nociceptive tests in the rat. 2. CP-101,606 30 mg kg(-1), s.c., at 0.5 and 2.5 h after carrageenan challenge suppressed mechanical hyperalgesia without any apparant a…	Excluded
Antiinflammatory action of endocannabinoid palmitoylethanolamide and the synthetic cannabinoid nabilone in a model of acute inflammation in the rat	1. The antiinflammatory activity of synthetic cannabinoid nabilone in the rat model of carrageenan-induced acute hindpaw inflammation was compared with that of the endocannabinoid palmitoylethanolamide and the nonsteroidal antiinflammatory drug indomethacin. 2. Preliminary experiments in rats used a tetrad of behavioural tests, specific for tetrahydrocannabinol-type activity in the CNS. These sho…	Excluded
The reduction of antinociceptive effect of morphine administered intraventricularly is correlated with the decrease of serotonin release from the spinal cord in streptozotocin-induced diabetic rats	1. The antinociceptive effect of morphine (25 mu g) administered into the 3rd ventricle was significantly attenuated in streptozotocin-induced diabetic rats as measured by the tail flick assay. 2. The release of serotonin (5-HT; 5-hydroxytryptamine) from the spinal cord caused by intraventricular injection of morphine (25 mu g) was significantly reduced in streptozotocin induced diabetic rats. 3.…	Included
The induction of des-Arg9-bradykinin-mediated hyperalgesia in the rat by inflammatory stimuli	1. The B1 receptor agonist des-Arg9-BK does not induce mechanical hyperalgesia when injected into the rat knee joint at 1-100 nmol, or thermal hyperalgesia when injected intravenously up to 1 mumol/kg. 2. Bradykinin (BK), administered into the joint, (1 nmol-1 mumol) induces a mechanical hyperalgesia, which is maximal by 4 h. Co-administration of BK with Hoe 140 (5 pmol) blocked development of th…	Excluded
Opioids and pain	1. The central nervous system in mammals is able to react to painful stimuli at many levels that are involved in transmission, modulation and sensation of pain. Endogenous opioid peptides and their receptors are located at key points in pain pathways, and response to pain can be modulated by local application of opioids at many sites. Mechanisms of opioid analgesia at peripheral, spinal, medullar…	Excluded
CRF1 receptor signaling pathways are involved in stress-related alterations of colonic function and viscerosensitivity: implications for irritable bowel syndrome	1. The characterization of corticotropin releasing factor (CRF) and, more recently, the discovery of additional CRF-related ligands, urocortin 1, urocortin 2 and urocortin 3, the cloning of two distinct CRF receptor subtypes, 1 (CRF(1)) and 2 (CRF(2)), and the development of selective CRF receptor antagonists provided new insight to unravel the mechanisms of stress. Activation of brain CRF(1) rec…	Excluded
NEUROGENIC HYPERALGESIA - CENTRAL NEURAL CORRELATES IN RESPONSES OF SPINOTHALAMIC TRACT NEURONS	1. The contribution of activity in spinothalamic tract (STT) neurons to the pain and neurogenic hyperalgesia produced by a intradermal injection of 100-mu-g of capsaicin was investigated. Electrophysiological responses of identified STT neurons recorded in anesthetized monkeys were compared with psychophysical measurements of pain and hyperalgesia obtained in humans using identical stimuli. 2. Ma…	Excluded
Endothelins contribute towards nociception induced by antigen in ovalbumin-sensitised mice	1. The contribution of endogenous endothelins to nociceptive responses elicited by ovalbumin (OVA) in the hind-paw of mice sensitised to this antigen (50 microg OVA+5 mg Al(OH)(3), s.c., 14 days beforehand) was investigated. 2. Sensitised mice exhibited greater nocifensive responsiveness to intraplantar (i.pl.) OVA (total licking time over first 30 min: 85.2+/-14.6 s at 0.3 microg; 152.6+/-35.6 s…	Excluded
Catalase has negligible inhibitory effects on endothelium-dependent relaxations in mouse isolated aorta and small mesenteric artery	1. The current study examined the hypothesis that endothelial production of hydrogen peroxide (H2O2) mediates relaxations to acetylcholine (ACh) in aorta and small mesenteric arteries (SMA) from mice. 2. Relaxations to ACh (0.01-10 microM) and H2O2 (0.1-1000 microM) were produced in aorta and SMA isolated from wild-type C57BL/6 mice and type II diabetic mice (db/db). In SMA, relaxations to ACh we…	Excluded
Regeneration of cutaneous afferent unmyelinated (C) fibers after transection	1. The cutaneous receptive properties of C-fiber units were studied 1-8 mo after transection and repair of the rabbit's great auricular nerve. The proportions of C-fiber units that could be excited by the cutaneous stimuli known to excite normal C-fiber afferent elements of the same nerve increased with time of recovery and approached the normal range within 5 mo after transection. No evidence wa…	Excluded
Blockade of the inflammatory effects of platelet-activating factor by cyclo-oxygenase inhibitors	1. The edematogenic and hyperalgesic effects of synthetic Platelet-Activating Factor (PAF-acether) on the rat paw were investigated. 2. PAF-acether induced a dose-dependent oedema and hyperalgesia. 3. These effects were partially reduced by non-steroidal anti-inflammatory agents. 4. It is suggested that the oedema and hyperalgesia in response to PAF-acether are due at least in part to the release…	Excluded
Investigation into atropine-induced antinociception	1. The effect of atropine on the nociceptive system was examined in mice and rats by use of the hot-plate, writhing and tail-flick tests. 2. Atropine dose-dependently produced analgesia, no effect and hyperalgesia. Analgesia was observed in both species with doses ranging from 1 to 100 micrograms kg-1 while hyperalgesia was obtained with 5 mg kg-1. 3. Atropine antinociception was prevented by pir…	Excluded
Role of lipocortin-1 in the anti-hyperalgesic actions of dexamethasone	1. The effect of dexamethasone, lipocorton-1(2-26) and an antiserum to lipocortin-1(2-26) (LCPS1) upon the hyperalgesic activities in rats of carrageenin, bradykinin, tumour necrosis factor alpha (TNF alpha), interleukin-1(2), interleukin-6 (IL-6), interleukin-8 (IL-8), prostaglandin E beta (PGE2) and dopamine were investigated in a model of mechanical hyperalgesia. 2. Hyperalgesic responses to i…	Excluded
Cytokine-mediated inflammatory hyperalgesia limited by interleukin-1 receptor antagonist	1. The effect of IL-1ra on response to intraplantar (i.pl.) injection of LPS, carrageenin, bradykinin, TNFalpha, IL-1beta, IL-8, PGE(2) and dopamine was investigated in a model of mechanical hyperalgesia in rats. 2. IL-1ra inhibited hyperalgesic response to LPS, carrageenin, bradykinin, TNFalpha, and IL-1beta, but not responses to IL-8, PGE(2) and dopamine. 3. A sheep anti-rat IL-1ra serum potent…	Excluded
Cytokine-mediated inflammatory hyperalgesia limited by interleukin-4	1. The effect of IL-4 on responses to intraplantar (i.pl.) carrageenin, bradykinin, TNFalpha, IL-1beta, IL-8 and PGE2 was investigated in a model of mechanical hyperalgesia in rats. Also, the cellular source of the IL-4 was investigated. 2. IL-4, 30 min before the stimulus, inhibited responses to carrageenin, bradykinin, and TNFalpha, but not responses to IL-1beta, IL-8 and PGE2. 3. IL-4, 2 h bef…	Excluded
Cytokine-mediated inflammatory hyperalgesia limited by interleukin-10	1. The effect of interleukin-10 (IL-10) upon the hyperalgesic activities in rats of bradykinin, tumor necrosis factor alpha (TNF alpha), interleukin-1 beta (IL-1 beta), interleukin-6 (IL-6), interleukin-8 (IL-8), prostaglandin E2 (PGE2) and carrageenin were investigated in a model of mechanical hyperalgesia. 2. Hyperalgesic responses to bradykinin (1 micrograms) were inhibited in a dose-dependent…	Excluded
The effect of nifedipine on spontaneous, drug-induced and reflexly-activated contractions of the rat urinary bladder: evidence for the participation of an intracellular calcium store to micturition contraction	1. The effect of nifedipine on spontaneous and stimulated motility of the rat urinary bladder has been investigated in vitro (isolated detrusor strips) and in vivo (micturition reflex). 2. Nifedipine inhibited tone and spontaneous activity of the isolated rat bladder, its effect being greater in indomethacin-treated preparations. Nifedipine suppressed the KCl induced phasic and tonic contraction …	Excluded
Endothelium-dependent increase in vascular sensitivity to phenylephrine in long-term streptozotocin diabetic rat aorta	1. The effect of short- and long-term streptozotocin (STZ)-induced diabetes (12 and 52 weeks) on the vascular response to phenylephrine was examined in the isolated thoracic aorta with and without intact endothelium from diabetic, age matched control rats and diabetic rats treated with insulin. 2. Twelve weeks after induction of diabetes, aortae with intact endothelium demonstrated no changes eit…	Excluded
Inhibition by troglitazone of the antigen-induced production of leukotrienes in immunoglobulin E-sensitized RBL-2H3 cells	1. The effect of troglitazone, an anti-diabetic drug with insulin-sensitizing action, on antigen-induced production of leukotriene (LT) B(4), C(4) and E(4) and prostaglandin D(2) (PGD(2)) was examined in dinitrophenol (DNP)-specific immunoglobulin E (IgE)-sensitized RBL-2H3 mast cells following stimulation by the antigen, DNP-conjugated human serum albumin. Levels of LTB(4), C(4) and E(4) and PGD…	Excluded
AL0671, a new potassium channel opener, inhibits nonenzymatic glycation of protein and LDL oxidation	1. The effects of AL0671, a novel potassium channel opener, on protein glycation and low-density lipoprotein (LDL) oxidation were tested. 2. AL0671 dose-dependently inhibited both fluorescence development of bovine serum albumin and cross-linking of lysozyme. These inhibitory effects for glycation were no less potent than aminoguanidine. 3. AL0671 dose-dependently inhibited both increase in negat…	Excluded
[Effects of clonidine on diuresis and water intake in normal and Brattleboro rats. (author's transl)]	1. The effects of clonidine on water balance were compared in normal (N.) and diabetes insipidus (Brattleboro D.I.) conscious rats. Animals were housed in individual cages and feed food and water ad libitum. The dose of clonidine was 100 microgram . kg-1 by subcutaneous route during consecutive 9 days. A control period of 12 days without drug treatment (only saline as a sham injection) separated …	Excluded
Ca(2+)-dependent plasticity of miniature inhibitory postsynaptic currents after amputation of dendrites in central neurons	1. The effects of cutting off the bulk (> 2/3) of the dendritic tree (dendrotomy) on GABAergic miniature inhibitory postsynaptic currents (mIPCSs) were studied in granule cells of the adult rat dentate gyrus in 400-microns-thick slices in vitro. 2. After dendrotomy carried out in warm (32 degrees C) control artificial cerebrospinal fluid (ACSF), only small antidromic population spikes could be ev…	Excluded
In vitro contractile responses of vasa deferentia from spontaneously diabetic BB rats	1. The effects of diabetes of 6 months' duration on autonomic function of the vas deferens were examined in spontaneously diabetic BB rats and diabetes-resistant BB rats. 2. Diabetes caused significant decreases in rat and testes weights, but had no effects on the weights of vasa deferentia compared to diabetes-resistant controls. 3. The contractile responses of vasa deferentia to nerve stimulati…	Excluded
Activity-dependent slowing of conduction differentiates functional subtypes of C fibres innervating human skin	1. The effects of impulse activity on conduction in cutaneous C fibres have been examined in 46 microneurographic recordings from 11 normal subjects and 11 diabetic patients with normal nerve conduction. A tungsten microelectrode was inserted into a cutaneous nerve, usually the superficial peroneal close to the ankle, and intraneural microstimulation was used to identify an area of skin innervate…	Excluded
Sympathectomy induces adrenergic excitability of cutaneous C-fiber nociceptors	1. The effects of ipsilateral removal of the superior cervical ganglion on the subsequent responsiveness of C-fiber polymodal nociceptors (CPMs) of the ear to close-arterial injections of norepinephrine (NE) were evaluated in adult, anesthetized rabbits. 2. In normal unanesthetized rabbits, the two ears were usually at the same temperature. Immediately after the ganglionectomy, the ipsilateral ea…	Excluded
The analgesic effect of quaternary analogues of morphine and nalorphine	1. The effects of N-methyl morphine and N-methyl nalorphine were studied on the hyperalgesia induced by prostaglandin E2 in the rat paw. Morphine and N-methyl morphine injected intraperitoneally (2-8 mg/kg) caused a dose-dependent analgesia. The potency of N-methyl morphine was of the same order of magnitude as its parent compound in causing analgesia. 2. Nalorphine caused a short-lasting analges…	Excluded
Altered thermoregulatory responses to clonidine in streptozotocin-diabetic rats	1. The effects of streptozotocin (STZ) treatment on alpha 2-adrenoceptor regulation of body temperature were studied by monitoring the response of colonic temperature to administration of clonidine. 2. A dose-dependent fall in colonic temperature occurred in control rats given clonidine challenge (0.05-2.0 mg kg-1, s.c.); this response was inhibited by prior administration of either yohimbine or …	Excluded
Effects of nerve injury on sympathetic excitation of A mechanical nociceptors	1. The effects of sympathetic stimulation and close arterial injection of norepinephrine were tested on cutaneous myelinated-fiber (A) mechanical nociceptors [high-threshold mechanoreceptors-(MyHTMs)] from normal and from partially transsected nerves. 2. Neither sympathetic stimulation nor close arterial injection of norepinephrine (200 ng) excited MyHTMs (18) recorded from the uninjured great au…	Excluded
Cardiovascular reflex responses after intrathecal omega-conotoxins or dexmedetomidine in the rabbit	1. The effects of thoracic intrathecal doses (1 mug/kg) of the alpha(2) -adrenoceptor agonist dexmedetomidine and omega-conotoxins MVIIA and CVID on vasoconstrictor and heart rate responses to acute central hypovolaemia were studied in seven chronically instrumented rabbits. 2. Gradual inflation of an inferior vena cava cuff to reduce cardiac index (CI) by 8% per minute induced progressive vasoco…	Excluded
Bradykinin initiates cytokine-mediated inflammatory hyperalgesia	1. The hyperalgesic activities in rats of bradykinin, carrageenin and lipopolysaccharide (LPS) were investigated in a model of mechanical hyperalgesia. 2. Bradykinin and carrageenin evoked dose-dependent hyperalgesia with maximum responses of similar magnitude to responses to LPS (1 and 5 micrograms). 3. Hoe 140, an antagonist of BK2 receptors, inhibited in a dose-dependent manner hyperalgesic re…	Excluded
The pivotal role of tumour necrosis factor alpha in the development of inflammatory hyperalgesia	1. The hyperalgesic activities in rats of interleukin-1 beta (IL-1 beta), IL-6, IL-8, tumour necrosis factor alpha (TNF alpha) and carrageenin were investigated. 2. IL-6 activated the previously delineated IL-1/prostaglandin hyperalgesic pathway but not the IL-8/sympathetic mediated hyperalgesic pathway. 3. TNF alpha and carrageenin activated both pathways. 4. Antiserum neutralizing endogenous TN…	Excluded
Peripheral analgesic activities of peptides related to alpha-melanocyte stimulating hormone and interleukin-1 beta 193-195	1. The hyperalgesic effects of interleukin-1 beta (IL-1 beta) and prostaglandin E2 (PGE2) were measured in rats. 2. Hyperalgesic responses to IL-1 beta were inhibited in a dose-dependent manner by alpha-melanocyte stimulating hormone (alpha-MSH)-related peptides with the following order of potency: [N1(4),D-Phe7]alpha-MSH greater than alpha-MSH greater than Lys-D-Pro-Val greater than Lys-Pro-Val …	Excluded
Interleukin-8 as a mediator of sympathetic pain	1. The hyperalgesic effects of interleukin-8 (IL-8), interleukin-1 beta (IL-1 beta) and carrageenin were measured in a rat paw pressure test. 2. IL-8 evoked a dose-dependent hyperalgesia which was attenuated by a specific antiserum, the beta-adrenoceptor antagonists atenolol and propranolol, the dopamine receptor antagonist SCH 23390 and the adrenergic neurone-blocking agent guanethidine. The hyp…	Excluded
Comparative in vitro metabolism of indinavir in primates--a unique stereoselective hydroxylation in monkey	1. The in vitro metabolism of indinavir (CRIXIVAN, MK-0639, L-735,524), an HIV protease inhibitor, was evaluated using liver microsomes from cynomolgus monkey, rhesus monkey, chimpanzee and human. Indinavir exhibited marked species differences in metabolism. The overall rate of indinavir metabolism varied > 4-fold among primates (84 pmol/min/mg protein in cynomolgus monkey versus 20.4 pmol/min/mg…	Excluded
The influence of streptozotocin-induced diabetes mellitus on the sensitivity of rat urinary bladder body and base strips to changes in extracellular calcium	1. The influence of calcium on contractile responses of bladders from control and 2 month streptozotocin-diabetic rats was investigated. 2. Removal of calcium from the bathing medium caused rapid decreases in the contractile responses of bladder body and base strips to carbachol. The responses of strips from control rats were reduced more by calcium removal than were strips from diabetics. 3. Rep…	Excluded
An isobolographic analysis of the effects of N-methyl-D-aspartate and NK1 tachykinin receptor antagonists on inflammatory hyperalgesia in the rat	1. The interaction between N-methyl-D-aspartate (NMDA) and NK1 tachykinin receptors was analyzed isobolographically in rats with inflammatory hyperalgesia induced by intraplantar injection of complete Freund's adjuvant-saline emulsion (CFA, 100 micrograms Mycobacterium tuberculosis). 2. Thermal hyperalgesia of the inflamed paw, determined by paw withdrawal response to a heat stimulus, was dose-de…	Excluded
Bradykinin receptors	1. The last decade has witnessed a phenomenal increase in our understanding of the pharmacology of bradykinin receptors, and has led to an appreciation of a key role for the peptide kinins as proinflammatory mediators. This short review summarises the major changes that have taken place in the expanding area of bradykinin receptor pharmacology, and highlights important advances that we hope to an…	Excluded
B1 bradykinin receptors and sensory neurones	1. The location of the B1 bradykinin receptors involved in inflammatory hyperalgesia was investigated. 2. No specific binding of the B1 bradykinin receptor ligand [3H]-des-Arg10-kallidin was detected in primary cultures of rat dorsal root ganglion neurones, even after treatment with interleukin-1 beta (100 iu ml-1). 3. In dorsal root ganglion neurones, activation of B2 bradykinin receptors stimul…	Excluded
The relationship of hyperalgesia in SART (repeated cold)-stressed animals to the autonomic nervous system	1. The mechanism of hyperalgesia observed in SART (repeated cold)-stressed animals (mice and rats) was studied in relation to the autonomic nervous system. 2. SART stress reduced the nociceptive threshold previously increased in vagotomized mice, but failed to change the threshold previously decreased in sympathectomized mice. 3. The nociceptive threshold previously decreased in SART-stressed mic…	Excluded
Pharmacological characterization of the nociceptin receptor mediating hyperalgesia in the mouse tail withdrawal assay	1. The newly discovered neuropeptide nociceptin (NC) has recently been reported to be the endogenous ligand of the opioid-like orphan receptor. Despite its structural similarity to opioids, when injected intracerebroventricularly (i.c.v.) in the mouse, NC exerts a direct hyperalgesic effect and reverses opioid-induced analgesia. In the present investigation, these two effects of NC were evaluated…	Excluded
The nonpeptide B2 receptor antagonist FR173657: inhibition of effects of bradykinin related to its role in nociception	1. The nonpeptide bradykinin B2 receptor antagonist, FR173657 ((E)-3-(6-acetamido-3-pyridyl)-N-[N-(2, 4-dichloro-3-[(2-methyl-8-quinolinyl) oxymethyl] phenyl]-N-methylaminocarbonylmethyl] acrylamide), was tested in models involving bradykinin-induced activation of primary afferent neurones in vitro and in vivo. 2. Bradykinin-induced contractions of the rabbit isolated iris sphincter muscle mediat…	Excluded
Pharmacological modulation of secondary mediator systems--cyclic AMP and cyclic GMP--on inflammatory hyperalgesia	1. The objective of the present paper was to evaluate the relevance of neuronal balance of cyclic AMP and cyclic GMP concentration for functional regulation of nociceptor sensitivity during inflammation. 2. Injection of PGE2 (10-100 ng paw-1) evoked a dose-dependent hyperalgesic effect which was mediated via a cyclic AMP-activated protein kinase (PKA) inasmuch as hyperalgesia was blocked by the P…	Excluded
Production of antinociception by peripheral administration of [Lys7]dermorphin, a naturally occurring peptide with high affinity for mu-opioid receptors	1. The opioid activity of the amphibian peptide, [Lys7]dermorphin, was studied in rats and mice. When administered intracerebroventricularly (i.c.v.), intravenously (i.v.) or subcutaneously (s.c.) it produced a long lasting analgesia. Its antinociceptive potency exceeded that of morphine 290 times by i.c.v. injection, and 25-30 times by peripheral administration. 2. The dose-response curves of [L…	Excluded
S14080, a peripheral analgesic acting by release of an endogenous circulating opioid-like substance	1. The oral administration of a benzothiazolinone derivative (benzoyl-6 dihydro-2,3 benzothiazole), S14080, caused dose-dependent antinociception in the rat paw pressure test, which represents a model of mechanical hyperalgesia. S14080 had no significant effect on the inflammatory oedema induced by carrageenin or on the tail flick test, nor did it possess a notable antipyretic effect. 2. Post-tre…	Excluded
Central and peripheral actions of the novel kappa-opioid receptor agonist, EMD 60400	1. The pharmacological characteristics of the kappa-opioid receptor agonist, EMD 60400, have been investigated, with particular reference to its central and peripheral sites of action and its ability to influence nociception. The kappa agonists ICI 197067 and ICI 204448 were tested for purposes of comparison. 2. EMD 60400 and ICI 197067 bind with high affinity (IC50 values of 2.8 and 1.5 nM, resp…	Excluded
GR94839, a kappa-opioid agonist with limited access to the central nervous system, has antinociceptive activity	1. The pharmacological profile of GR94839, a kappa-opioid agonist with limited access to the central nervous system, has been investigated. Its antinociceptive activity has been compared with that of GR103545, a centrally-penetrating kappa-agonist and ICI204448, the previously described peripherally-selective kappa-agonist. 2. GR94839 was a potent agonist in the rabbit vas deferens in vitro assay…	Excluded
A pharmacological profile of the novel, peripherally-selective kappa-opioid receptor agonist, EMD 61753	1. The pharmacological properties of the novel diarylacetamide kappa-opioid receptor agonist, EMD 61753, have been compared with those of ICI 197067 (a centrally-acting kappa agonist) and ICI 204448 (a peripherally-selective kappa agonist). 2. EMD 61753 binds with high affinity (IC50 5.6 nM) and selectivity (kappa:mu:delta:sigma binding ratio 1:536:125: > 1,786) to kappa-opioid receptors and is a…	Excluded
Effects of N- and L-type calcium channel antagonists on the responses of nociceptive spinal cord neurons to mechanical stimulation of the normal and the inflamed knee joint	1. The present study addresses the involvement of voltage-dependent calcium channels of the N and L type in the spinal processing of innocuous and noxious input from the knee joint, both under normal conditions and under inflammatory conditions in which spinal cord neurons become hyperexcitable. In 30 anesthetized rats, extracellular recordings were performed from single dorsal horn neurons in se…	Excluded
Type 1 diabetes and hypercholesterolaemia reveal the contribution of endothelium-derived hyperpolarizing factor to endothelium-dependent relaxation of the rat aorta	1. The present study evaluated the effect of diabetes, hypercholesterolaemia and their combination on the contribution of nitric oxide (NO) and endothelium-derived hyperpolarizing factor (EDHF) to relaxation of rat isolated aortic rings and the potential contribution of oxidant stress to the disturbance of endothelial function. 2. Thoracic aortic rings from control, diabetic, hypercholesterolaemi…	Excluded
Relevance of tumour necrosis factor-alpha for the inflammatory and nociceptive responses evoked by carrageenan in the mouse paw	1. The present study evaluated the participation of tumour necrosis factor-alpha (TNF-alpha) in the inflammatory and nociceptive responses evoked by carrageenan in the mouse paw. 2. The intraplantar injection of carrageenan (300 microg paw-1) induced a marked and biphasic paw oedema formation (peaks at 6 and 72 h), which was accompanied by a long-lasting mechanical allodynia (that remained elevat…	Excluded
Evidence for involvement of catecholamines in the effect of morphine on ventricular automaticity in the rat	1. The present study examined the effects of morphine on ectopic automaticity induced by local injury in the isolated right ventricle of the rat. 2. Morphine (10(-7)-5 x 10(-5) M) induced a significant increase of ventricular rate similar to that produced by noradrenaline. The excitatory effect of morphine was not modified by the presence of naloxone (5 x 10(-5) M). The maximal effect obtained wi…	Excluded
Alterations in atrial reactivity in a strain of spontaneously diabetic rats	1. The present study examined the reactivity of atria from control and spontaneously diabetic rats to various adrenoceptor agonists and to adenosine. 2. Isoprenaline (1.5 nM-1500 nM) produced concentration-dependent increases in inotropy which were unchanged in diabetic atria. However, the sensitivity to isoprenaline-induced changes in chronotropy was reduced in diabetic preparations. 3. In the p…	Excluded
Potent analgesic and anti-inflammatory actions of a novel thymulin-related peptide in the rat	1. The present study examines the effect of PAT (peptide analogue of thymulin) in two rat models of inflammatory hyperalgesia induced by either i.pl. (1.25 microg in 50 microl saline) or i.p. (50 microg in 100 microl) injections of endotoxin ET. 2. Pretreatment with PAT (1, 5 or 25 microg in 100 microl saline, i.p.) decreased, in a dose dependent manner, both mechanical hyperalgesia, determined b…	Excluded
Carnitine esters prevent oxidative stress damage and energy depletion following transient forebrain ischaemia in the rat hippocampus	1. The present study investigated whether propionyl-L-carnitine (PLC) has neuroprotective effects, similar to those reported for acetyl-L-carnitine (AC), against transient forebrain ischaemia-induced neuronal damage and biochemical derangement in the rat hippocampal CA1 region. 2. In total, 105 adult male Wistar albino rats were divided into seven groups of 15 animals each. The first three groups…	Excluded
In vivo evidence for a role of protein kinase C in peripheral nociceptive processing	1. The present study was designed to characterize the nociceptive response induced by protein kinase C (PKC) peripheral activation and to investigate if this biochemical event is important for the nociceptive response induced by formaldehyde, and bradykinin (BK). 2. Intraplantar injection of phorbol-12,13-didecanoate (PDD; 0.01, 0.1 or 1 microg), a PKC activator, but not of 4 alpha-PDD (inactive …	Excluded
Effects of prostaglandins on baroreflex during reperfusion of the ischaemic myocardium	1. The present study was planned to: (i) determine whether the baroreflex control of heart rate (HR) and renal sympathetic nerve activity (RSNA) was attenuated during reperfusion of short-term ischaemic myocardium; and (ii) study whether blockade of prostaglandin synthesis with indomethacin reversed the inhibitory baroreflex. 2. Arterial pressure was lowered with intravenous sodium nitroprusside …	Excluded
Electrophysiological evidence for the interaction of substance P and glutamate on A delta and C afferent fibre activity in rat hairy skin	1. The purpose of the present study was to investigate whether there was a cooperative interaction between substance P (SP) and glutamate (GLU) administered subcutaneously on A delta and C primary afferent fibre activity in dorsal hairy skin of the rat in vivo. The single unit activities of A delta and C afferent fibres were recorded by isolation of fibre filaments from the dorsal cutaneous nerve…	Excluded
Antinociceptive profile of the pseudopeptide B2 bradykinin receptor antagonist NPC 18688 in mice	1. The purpose of this study was to investigate the topical and systemic anti-hyperalgesic effect of the newly-developed pseudopeptide B2 receptor antagonist, NPC 18688, in different models of nociception in mice. 2. Given systemically 30 min beforehand, NPC 18688 (10-300 nmol kg-1, i.p.) caused no agonist effect, but produced a dose-related and significant inhibition of abdominal constrictions c…	Excluded
Alterations in the potassium-evoked release of substance P from the spinal cord of streptozotocin-induced diabetic rats in vitro	1. The release of SPLI evoked by high levels of K+ (50 mM) from the spinal cord of diabetic rats was greater than in the case of spinal cord from control rats. 2. Morphine (10(-5) M) significantly inhibited the K(+)-evoked release of SPLI release in both the groups. However, in spinal cord from diabetic rats, morphine reduced the K(+)-evoked release of SPLI only to the levels that were observed i…	Excluded
The effects of aldose reductase inhibition with ponalrestat on changes in vascular function in streptozotocin diabetic rats	1. The responses of rat isolated aortae to vasoconstrictor and vasodilator agents have been studied in 14-day streptozotocin-diabetic rats. The effects of treatment with the aldose reductase inhibitor, ponalrestat, on these responses have also been investigated. 2. Maximum contractile responses and aortic sensitivity to phenylephrine were significantly enhanced in 14-day diabetic aortae. 3. In co…	Excluded
Induction of bradykinin B1 receptors in vivo in a model of ultra-violet irradiation-induced thermal hyperalgesia in the rat	1. The role of bradykinin B1 receptors in the thermal hyperalgesia following unilateral ultra-violet (u.v.) irradiation of the hindpaw of rats has been investigated. 2. In non-irradiated (naive) animals the B1 receptor agonist des-Arg9-bradykinin and bradykinin (BK) (up to 1 mumol kg-1 i.v.) had no effect on withdrawal latency to a noxious heat stimulus when administered 60 min before testing. 3.…	Excluded
Enhanced descending modulation of nociception in rats with persistent hindpaw inflammation	1. The role of descending brain stem modulatory systems in the development of persistent behavioral hyperalgesia and dorsal horn hyperexcitability was studied in rats with unilateral hindpaw inflammation. Inflammation was induced by intraplantar injection of complete Freund's adjuvant (CFA, 0.05 ml of an 1:1 oil/saline emulsion, 25 micrograms Mycobacterium), or lambda carrageenan (1 mg/ 0.1 ml sa…	Excluded
Leukemia inhibitory factor induces sympathetic sprouting in infect dorsal root ganglia in the adult rat in vivo	1. The role of the cytokine leukemia inhibitory factor (LIF) in axotomy-induced sprouting of postganglionic sympathetic fibres into the dorsal root ganglia was examined in the adult rat. 2. Immunocytochemistry was used to study the distribution and density of tyrosine hydroxylase-immunoreactive (TH-IR) fibres within the lumbar dorsal root ganglia and lumbar spinal nerves 14 days following continu…	Excluded
The thermal sensitivity of the polymodal nociceptors in the monkey	1. The static and dynamic sensitivities to thermal and mechanical stimuli of polymodal nociceptors in hairy skin of the anaesthetized monkey have been investigated by recording activity in their primary nerve fibres. 2. Polymodal nociceptors responded to skin pricking, pinching and heating to temperatures higher than 40 degrees C. They did not respond to touch, stretch or cold. The conduction vel…	Excluded
Effects of combined neutral endopeptidase 24-11 and angiotensin-converting enzyme inhibition on femoral vascular conductance in streptozotocin-induced diabetic rats	1. The successive effects of the angiotensin-converting enzyme inhibitor captopril (CAP, 2 mg kg(-1)+1 mg kg(-1) 30 min(-1) infusion) and the neutral endopeptidase 24-11 inhibitor retrothiorphan (RT, 25 mg kg(-1)+12.5 mg kg(-1) 30 min(-1) infusion) were studied on femoral vascular conductance (FVC) in streptozotocin-induced diabetic (STZ-SD) and control Sprague-Dawley (C-SD) rats. The role of the…	Excluded
Adenosine inhibitory effect on enhanced growth of aortic smooth muscle cells from streptozotocin-induced diabetic rats	1. There is evidence to suggest that adenosine may regulate arterial smooth muscle cell (SMC) growth and proliferation, which is a key event in atherogenesis. This regulation may be mediated via adenylate cyclase. As diabetes is a known risk factor for atherosclerosis, we investigated the growth of aortic SMC from diabetic rats in primary culture and their sensitivity to adenosine and to adenylat…	Excluded
Preclinical pharmacology of lumiracoxib: a novel selective inhibitor of cyclooxygenase-2	1. This manuscript presents the preclinical profile of lumiracoxib, a novel cyclooxygenase-2 (COX-2) selective inhibitor. 2. Lumiracoxib inhibited purified COX-1 and COX-2 with K(i) values of 3 and 0.06 microM, respectively. In cellular assays, lumiracoxib had an IC(50) of 0.14 microM in COX-2-expressing dermal fibroblasts, but caused no inhibition of COX-1 at concentrations up to 30 microM (HEK …	Excluded
INCREASED RESPONSIVENESS OF SENSORY NEURONS IN THE SAPHENOUS NERVE OF THE STREPTOZOTOCIN-DIABETIC RAT	1. This study examined sensory neurons in the saphenous nerve of rats treated with streptozotocin to induce diabetes (STZ-D). Several physiological properties of sensory neurons were not significantly different in STZ-D compared with control (CON) rats, including percentage and rate of spontaneous activity seen in the whole nerve and mechanical and thermal thresholds of individual C-fibers. 2. Th…	Excluded
Effects of adenosine and isoprenaline in left atria from both neonatal and middle-aged noninsulin-dependent diabetic rat models	1. This study examined the ability of atria from neonatal and middle-aged noninsulin-dependent diabetic rat models to respond to both adenosine and isoprenaline. 2. Cumulative additions of adenosine (1-1000 microM) produced concentration-dependent decreases in the force of contraction of rat atria that were unchanged in neonatal diabetic animals. Although direct inotropic responses to adenosine w…	Excluded
The effects of dietary treatment with essential fatty acids on sciatic nerve conduction and activity of the Na+/K+ pump in streptozotocin-diabetic rats	1. This study examined the effects of dietary essential fatty acid supplementation (5% (w/w) evening primrose oil) upon sciatic motor nerve conduction velocity and 86Rb+ pumping in sciatic nerve endoneurial preparations in rats with 4 to 5 weeks of streptozotocin-induced diabetes. 2. Control diabetic rats (dietary supplementation with 5% (w/w) hydrogenated coconut oil) exhibited a reduction in mo…	Excluded
Deficient nitric oxide responsible for reduced nerve blood flow in diabetic rats: effects of L-NAME, L-arginine, sodium nitroprusside and evening primrose oil	1. This study examined the potential role of impaired nitric oxide production and response in the development of endoneurial ischaemia in experimental diabetes. Rats were anaesthetized (Na pentobarbitone 45 mg kg-1, diazepam 2 mg kg-1) for measurement of sciatic nerve laser Doppler flux and systemic arterial pressure. Drugs were administered into the sciatic endoneurium via a microinjector attach…	Excluded
Attenuated responses to endothelin-1, KCl and CaCl2, but not noradrenaline, of aortae from rats with streptozotocin-induced diabetes mellitus	1. This study investigated the responsiveness to vasoconstrictor agents (including endothelin-1, ET-1) of aortic rings from rats with two-week streptozotocin (STZ, 60 mg kg-1, i.v.)-induced diabetes and vehicle-treated control rats. The basal tension was 10 g, which was estimated to be more physiological than the tension of 1-2 g that has been previously used for most studies of aortic rings from…	Excluded
Capsazepine reversal of the antinociceptive action of capsaicin in vivo	1. This study was designed to investigate the antinociceptive activity of capsaicin in acute and persistent nocifensor behavioural models and to determine whether this was mediated via a specific receptor interaction, by use of the antagonist, capsazepine. 2. Capsaicin administered systemically in low doses produced antinociception in the knee joint hyperalgesia, rat paw pressure, rat and mouse t…	Excluded
Some pharmacologic and toxicologic studies on Rhazya stricta decne in rats, mice and rabbits	1. This work examines some in vivo and in vitro pharmacologic and toxicologic effects of extracts of Rhazya stricta, a medicinal plant in the United Arab Emirates. 2. R. stricta extracts at doses of 0.1-10 mg reduced the mean arterial blood pressure (MBP) of anesthetized rats in a dose-dependent manner. The depressor effect was partially sensitive to atropine (5 microM). Although the MBP was redu…	Excluded
Spatial patterns of increased spinal cord membrane-bound protein kinase C and their relation to increases in 14C-2-deoxyglucose metabolic activity in rats with painful peripheral mononeuropathy	1. Three-dimensional spatial patterns of changes in membrane-bound protein kinase C (PKC) were examined in the lumbar spinal cords (L<sub>1</sub>-L<sub>5</sub>) of rats with an experimental painful peripheral mononeuropathy. Painful peripheral mononeuropathy was produced by loosely ligating the rat's common sciatic nerve, resulting in chronic constrictive nerve injury (CCI). Changes in spinal cor…	Included
Cross-species comparisons of the pharmacokinetics of ibudilast	1. To enable clinical development of ibudilast for new indications, its pharmacokinetics were characterized in mice, rats, rabbits, dogs, cynomolgus monkeys, and minipigs. Animal pharmacokinetics were compared with a separate study in healthy volunteers. 2. Following oral dosing, the dose-normalized area under the curve (AUC) (DN-AUC(24h)) in humans is 896 ((ng.h ml(-1))/(mg kg(-1))), and in anim…	Excluded
Supraspinal inhibition of nociceptive dorsal horn neurones in the anaesthetized rat: tonic or dynamic?	1. Tonic inhibition of sensory spinal neurones is well known to descend from the rostroventral medulla. It is not clear if this inhibition is dynamically activated by peripheral noxious stimuli. 2. Transection of the ipsilateral dorsolateral funiculus (DLF) removed a descending inhibition of multireceptive spinal neurones and disproportionally prolonged the after-discharge component of their resp…	Excluded
Selective inhibition of arachidonate 5-lipoxygenase by novel acetohydroxamic acids: effects on acute inflammatory responses	1. Two selective inhibitors of arachidonate 5-lipoxygenase, BW A4C and BW A797C, have been studied for their effects on acute inflammatory responses following oral administration to rats and mice. 2. The concentrations of the lipoxygenase product leukotriene B4 (LTB4) in 6 h inflammatory exudates, induced in rats by the subcutaneous implantation of carrageenin-soaked polyester sponges, were reduc…	Excluded
Dibutyryl-cyclic GMP induces peripheral antinociception via activation of ATP-sensitive K(+) channels in the rat PGE2-induced hyperalgesic paw	1. Using the rat paw pressure test, in which increased sensitivity is induced by intraplantar injection of prostaglandin E2, we studied the action of several K(+) channel blockers in order to determine what types of K(+) channels could be involved in the peripheral antinociception induced by dibutyrylguanosine 3 : 5'-cyclic monophosphate (DbcGMP), a membrane permeable analogue of cyclic GMP. 2. D…	Excluded
Inhibitory mechanism of vascular endothelial growth factor (VEGF) by bucillamine	1. Vascular endothelial growth factor (VEGF) plays an important role in the neovascularization of ischaemic retinal diseases such as proliferative diabetic retinopathy. We determined that bucillamine, an anti-rheumatic drug, inhibits the VEGF production induced by hypoxia in bovine retinal microcapillary endothelial cells (BREC). To further clarify the inhibitory mechanism, we investigated the po…	Excluded
Increased sensitivity to endothelin-1 in isolated Krebs'-perfused kidneys of streptozotocin-diabetic rats	1. Vascular responses to endothelin-1 (ET-1) and noradrenaline (NA) were measured in isolated Krebs'-perfused kidneys of 2 week old streptozotocin-diabetic and non-diabetic rats. 2. Bolus injections of either ET-1 or NA caused dose-dependent increases in perfusion pressure. Responses to ET-1 (10-60 ng/g kidney), but not to NA (0.001-10 micrograms/g kidney), were significantly potentiated in kidne…	Excluded
Nephroprotection in Zucker diabetic fatty rats by vasopeptidase inhibition is partly bradykinin B2 receptor dependent	1. Vasopeptidase inhibition (i.e., the simultaneous inhibition of both angiotensin-converting enzyme (ACE) and neutral endopeptidase) can ameliorate diabetic nephropathy. We investigated whether this nephroprotection is mediated by the bradykinin B2 receptor. 2. In all, 43 obese Zucker diabetic fatty (ZDF/Gmi-fa/fa) rats aged 21 weeks were separated into four groups and treated for 26 weeks with …	Excluded
Demyelinisation in the spinal cord of vitamin B12 deficient fruit bats	1. Vitamin B12 deficiency induced in the fruit bat by a combination of dietary deprivation and exposure to nitrous oxide (N2O) is accompanied by profound neurological impairment, thus providing an experimental model for the study of vitamin B12 neuropathy. 2. Electron microscopy of the spinal cord of vitamin B12 deficient bats shows marked changes in the myelin of the posterior columns in the for…	Excluded
Improvement of ketoacidosis in the diabetic rat after the administration of the oral antilipolytic agent GR 79236	1. We assessed the effect of a novel oral antilipolytic agent, N-[(1S, trans)-2-hydroxycyclopentyl]adenosine (GR 79236), in experimental diabetic ketoacidosis. Ketotic rats were gavaged with GR 79236 (1 mg/kg) or water (vehicle) and their blood/plasma/serum biochemistry and haematological profile was determined. 2. We found that GR 79236 reduced the plasma non-esterified fatty acid concentration.…	Excluded
Implantation of tumoral XC cells induces chronic, endothelin-dependent, thermal hyperalgesia in mice	1. We describe here the alterations in the nociceptive sensitivity of Swiss CD1 mice receiving an intraplantar (i.pl.) administration of XC Rous sarcoma-virus-transformed rat fibroblasts (XC cells). 2. Histological studies reveal that XC cells remain at the injection site 2 - 3 weeks after implantation, a time at which an inflammatory reaction is also detected. No tumoral growth was found and 5 w…	Excluded
The antinociceptive effect of combined systemic adminstration of morphine and the glycine/NMDA receptor antagonsist, (+)-HA966 in a rat model of peripheral neuropathy	1. We evaluated the ability of the functional antagonist at the glycine site of the N-methyl-D-aspartate (NMDA) receptor complex, (+)-(1-Hydroxy-3-aminopyrrolodine-2-one) ((+)-HA966), to modulate the antinociceptive action of systemic morphine in a rat model of neuropathic pain produced by chronic constriction injury to the sciatic nerve. Mechanical (vocalization threshold to hindpaw pressure) an…	Included
Modulation of anoxic injury in CNS white matter by adenosine and interaction between adenosine and GABA	1. We examined the role of adenosine in the development of anoxic injury in a CNS white matter tract, the rat optic nerve. Application of adenosine protected the rat optic nerve from anoxic injury; 2.5 microM adenosine increased compound action potential (CAP) recovery after a standard 60-min anoxic period from 28.6 +/- 2.5%, mean +/- SE, to 51.0 +/- 3.1% (P < 0001). The protective effect of aden…	Excluded
Changes in somatic action potential shape in guinea-pig nociceptive primary afferent neurones during inflammation in vivo	1. We have examined whether there are changes during inflammation in the membrane properties of nociceptive primary afferent neurones in the guinea-pig that might contribute to hyperalgesia. Inflammation was induced by intradermal injections of complete Freund's adjuvant (CFA) in the left leg. Intracellular voltage recordings were made from the somata of ipsilateral L6 and S1 dorsal root ganglion…	Excluded
Effects of systemic non-steroidal anti-inflammatory drugs on nociception during tail ischaemia and on reperfusion hyperalgesia in rats	1. We have investigated the effects of five non-steroidal anti-inflammatory drugs (NSAIDs) on nociception during ischaemia and on reperfusion hyperalgesia in rats. 2. We induced tail ischaemia in conscious rats by applying a tourniquet at the base of the tail until the rats exhibited co-ordinated escape behaviour when we released the tourniquet. 3. We assessed hyperalgesia by measuring the tail f…	Included
Protein kinase C inhibitors decrease hyperalgesia and C-fiber hyperexcitability in the streptozotocin-diabetic rat	1. We have previously demonstrated that although rats with streptozotocin-induced diabetes (STZ-D) have decreased behavioral mechanical nociceptive thresholds (hyperalgesia), their C-fiber primary afferent mechanical (von Frey hair) thresholds are not altered. Instead, when stimulated with a standardized sustained suprathreshold mechanical stimulus, C-fibers from STZ-D rats were found to have an …	Included
Leukotriene B4 decreases the mechanical and thermal thresholds of C-fiber nociceptors in the hairy skin of the rat	1. We have recently shown that leukotriene B4 (LTB4), a product of the 5-lipoxygenase pathway of arachidonic acid metabolism, sensitizes nociceptors to mechanical stimuli. The present study examined whether LTB4 also induces a heat sensitization of cutaneous C-fiber nociceptors. The C-fiber nociceptors studied had von Frey hair thresholds greater than 5 g and were characterized according to their…	Excluded
The effects of inflammation and inflammatory mediators on nociceptive behaviour induced by ATP analogues in the rat	1. We have studied the behavioural effects of intraplantar injections of adenosine 5'-triphosphate (ATP) and related compounds in freely moving rats and investigated whether these nociceptive effects are augmented in the presence of inflammatory mediators. 2. We find that in normal animals ATP and analogues produce dose-dependent nocifensive behaviour (seen as bursts of elevation of the treated h…	Excluded
The dose-related effects of paracetamol on hyperalgesia and nociception in the rat	1. We have studied the effects of 3 low doses of paracetamol (25, 50 and 100 mg kg-1 p.o.) on inflammatory hyperalgesia, inflammatory oedema, and nociceptive thresholds in rats. 2. At the lower dose (25 mg kg-1), paracetamol reduces only central hyperalgesia. 3. At the doses of 50 and 100 mg kg-1, paracetamol reduces also peripheral hyperalgesia; moreover, it enhances nociceptive thresholds to a …	Excluded
The critical role of leukotriene B4 in antigen-induced mechanical hyperalgesia in immunised rats	1. We investigated the mediators responsible for mechanical hypersensitivity induced by antigen challenge in rats immunised with ovalbumin (OVA). 2. Challenge with OVA (12.5-100 micro g, intraplantar) caused a dose- and time-dependent mechanical hypersensitivity, which peaked 3 h after, decreased thereafter and reached control levels 24 h later. 3. Levels of TNFalpha, IL-1beta and cytokine-induce…	Excluded
UNMYELINATED NOCICEPTORS OF RAT PARASPINAL TISSUES	1. We made recordings from rat dorsal root filaments to study unmyelinated afferent units (conduction velocity less than or equal to 1.5 m/s) associated with deep paraspinal tissues of the dorsal sacrum and proximal tail. Data from 57 unmyelinated units were analyzed in 47 experiments. Receptive fields were identified in intact animals and then surgically isolated using microdissection. Units wer…	Excluded
Stimulation of nitric oxide release from rat spinal cord by prostaglandin E2	1. We recently demonstrated that intrathecal administration of prostaglandin E2 (PGE2) and PGF2alpha induced allodynia through a pathway that includes the glutamate receptor and nitric oxide (NO)generating systems from pharmacological studies. In order to clarify the involvement of NO in prostaglandin-induced allodynia, we measured NO released from rat spinal cord slices by a chemiluminescence me…	Excluded
Inhibition of nociceptin-induced allodynia in conscious mice by prostaglandin D2	1. We recently showed that intrathecal administration of nociceptin induced allodynia by innocuous tactile stimuli and hyperalgesia by noxious thermal stimuli in conscious mice. In the present study, we examined the effect of prostaglandins on nociceptin-induced allodynia and hyperalgesia. 2. Prostaglandin D<sub>2</sub> (PGD<sub>2</sub>) blocked the allodynia induced by nociceptin in a dose-depen…	Excluded
Sympathetic modulation of activity in rat dorsal root ganglion neurons changes over time following peripheral nerve injury	1. We recorded from centrally connected axons isolated from the proximal stump of the sciatic nerve in intact rats and in rats whose nerves had been transected 4 days-6 mo previously. Afferent axons selected for study had spontaneous impulse activity that originated ectopically in dorsal root ganglia (DRGs) L(4) and L(5) The sympathetic supply of these DRGs was excited by repetitive electrical st…	Excluded
AXONAL CROSS-EXCITATION IN NERVE-END NEUROMAS - COMPARISON OF A-FIBERS AND C-FIBERS	1. We recorded from single afferent axons ending in chronic sciatic nerve end neuromas in rats with the use of the teased-fiber method. Axons were sought that had ongoing impulse discharge originating in the neuroma. 2. Recording from myelinated (A-) fibers, tetanic stimulation of neighboring axons(50 Hz, 5 or 10 s, intensity adequate to drive A-fibers) caused an increase, and sometimes a decreas…	Excluded
FUNCTIONAL-CHANGES IN DORSAL-ROOT GANGLION-CELLS AFTER CHRONIC NERVE CONSTRICTION IN THE RAT	1. We studied the effects of a chronic nerve constriction on the evoked responses in dorsal root fibers in the rat to norepinephrine and to thermal stimuli applied either to the dorsal root ganglion (DRG) or the site of nerve injury. We recorded a total of 59 C fibers, 15 A delta-fibers, and 46 A beta-fibers from the L(5) dorsal root of the rats 11-52 days after a loose ligation of the ipsilatera…	Included
Effects of extremely low frequency magnetic fields on pain thresholds in mice: roles of melatonin and opioids	1. We studied the effects of extremely low frequency (ELF, 60 Hz) magnetic fields (MFs) on pain thresholds using the hot plate test. The implication of opioid and benzodiazepine system in the MFs-induced alteration of pain thresholds was also studied. 2. There was an increase at night time and a decrease at daytime of pain thresholds in normal mice. Exposure of MFs (24 h, 20 gauss (G)) inhibited …	Excluded
Involvement of endogenous nitric oxide in the mechanism of bradykinin-induced peripheral hyperalgesia	1. When NG-nitro-L-arginine methyl ester (L-NAME, 0.1-10 nmol) or NG-monomethyl-L-arginine (L-NMMA, 10 nmol-1 mumol) was intradermally administered with bradykinin (BK, 3 nmol) into the instep of rat hind-paws, a dose-related suppression of BK-induced hyperalgesia, assessed by the paw-pressure test, was produced. 2. L-Arginine (1 mumol) but not D-arginine (1 mumol) reversed the suppressive effect…	Excluded
Excitability changes of somatic and viscero-somatic nociceptive reflexes in the decerebrate-spinal rabbit: role of NMDA receptors	1. Wind-up (frequency-dependent potentiation of the responses of spinal neurones to stimulation of unmyelinated afferents) and other N-methyl-D-aspartate (NMDA) receptor-mediated phenomena have been proposed as key mechanisms underlying persistent pain states. In this study we have compared wind-up in visceral and somatic nociceptive pathways to examine the possible contribution of these mechanis…	Excluded
Prolonged primary afferent induced alterations in dorsal horn neurones, an intracellular analysis in vivo and in vitro	1.) Peripheral tissues injury produces long lasting sensory and motor disturbances in man that present as the post-injury hypersensitivity syndrome with a reduction in the threshold required to elicit either pain or the flexion withdrawal reflex and an exaggeration of the normal response to suprathreshold stimuli. 2.) Two mechanisms contribute to these changes; sensitization of the peripheral ter…	Excluded
Beneficial effects of PKF275-055, a novel, selective, orally bioavailable, long-acting dipeptidyl peptidase IV inhibitor in streptozotocin-induced diabetic peripheral neuropathy	1-[(2-adamantyl)amino]acetyl-2-cyano-(S)-pyrrolidine, monohydrochloride (PKF275-055), a vildagliptin analog, is a novel, selective, potent, orally bioavailable, and long-acting dipeptidyl peptidase IV inhibitor. We studied the effect of PKF275-055 administration on the prevention, protection, and treatment of diabetic neuropathy in the streptozotocin-induced diabetic rat. PKF275-055 improved body…	Excluded
In vitro and in vivo pharmacological characterization of J-113397, a potent and selective non-peptidyl ORL1 receptor antagonist	1-[(3R,4R)-1-cyclooctylmethyl-3-hydroxymethyl-4-piperidyl]-3-ethyl -1, 3-dihydro-2H-benzimidazol-2-one (J-113397) was found to be the first potent nonpeptidyl ORL1 receptor antagonist (K(i): cloned human ORL1=1.8 nM) with high selectivity over other opioid receptors (K(i): 1000 nM for human mu-opioid receptor, >10,000 nM for human delta-opioid receptor, and 640 nM for human kappa-opioid receptor)…	Excluded
[Effects of baicalin and liquid extract of licorice on sorbitol level in red blood cells of diabetic rats]	10 streptozotocin-induced diabetic rats were treated with baicalin 150 mg/kg.d and liquid extract of licorice (LEL) 7.5 ml/kg.d (5 by each medicine) for a week. The results indicated that orally baicalin and LEL could dramatically reduce the sorbitol levels in red blood cells (123.7 +/- 28.6 to 72.5 +/- 21.8 and 116.9 +/- 25.2 to 80.5 +/- 23.8 nmol/g.Hb, respectively) without affecting blood gluc…	Excluded
GRANULOCYTE-COLONY-STIMULATING FACTOR TREATMENT OF LEUKOPENIA DURING FRACTIONATED RADIOTHERAPY	11 patients suffering from an isolated leucopenia during fractionated radiotherapy were treated with granulocyte colony stimulating factor. (G-CSF). 4 of the patients received radiotherapy alone, and 7 patients received concomitant chemotherapy. G-CSF treatment was initiated at the occurrence of leucopenia and maintained for the duration of radiotherapy. The applied daily dose was 5 mu g/kg subcu…	Excluded
Phase I safety and pharmacokinetic trials of 1263W94, a novel oral anti-human cytomegalovirus agent, in healthy and human immunodeficiency virus-infected subjects	1263W94 [maribavir; 5,6-dichloro-2-(isopropylamino)-1, beta-L-ribofuranosyl-1-H-benzimidazole], a novel benzimidazole compound, has been demonstrated to potently and selectively inhibit human cytomegalovirus replication in vitro and to have favorable safety profiles in animal species. Two phase I trials evaluated the safety and pharmacokinetics of escalating single doses of 1263W94 in 13 healthy …	Excluded
The naturally occurring linoleic acid derivative, 13-hydroxyoctadecadienoic acid (13-HODE), corrects nerve and neurovascular dysfunction in diabetic rats	13-Hydroxyoctadecadienoic acid (13-HODE) is synthesized from linoleic acid by the lipoxygenase pathway. Although only cursorily studied to date, several actions of 13-HODE observed in other tissues could be potentially beneficial for diabetic neuropathy. These include endogenous PPAR agonism; anti-inflammatory mediation; when incorporated into diacylglycerol, protein kinase Cbeta antagonism; lipo…	Included
Samarium-153 EDTMP therapy of disseminated skeletal metastasis	153Sm-EDTMP (ethylenediaminetetramethylene phosphonate), prepared from a kit, was administered to 28 patients in a clinical trial of therapy for painful skeletal metastases unresponsive to all conventional treatment. The 103 keV gamma emission of 153Sm was utilized for prospective individual estimation of beta radiation absorbed dose to red marrow to minimize myelotoxicity and provide optimum int…	Excluded
177Lu-labeled cyclic polyaminophosphonates as potential agents for bone pain palliation	177Lu (T 1/2 = 6.71 d, Ebeta(max) = 497 keV) has radionuclidic properties suitable for use in palliative therapy of bone pain due to metastasis. 177Lu was produced in high-specific activity (3-4TBq/g) and excellent radionuclidic purity (100%) by thermal neutron bombardment of natural Lu target. Two cyclic tetraaminomethylene phosphonate ligands, namely DOTMP and CTMP were synthesized and radiolab…	Excluded
Stimulation of nonspecific immunity, haemopoiesis and protection of mice against radiation injury by 1-adamantylamide-L-alanyl-D-isoglutamine incorporated in liposomes	1-Adamantylamide-L-alanyl-D-isoglutamine (adamantylamide dipeptide (AdDP)) belongs to a group of desmuramyl muramyl peptide derivatives which are able to protect an organism from some viral infections. Encapsulation of AdDP to egg phosphatidyl choline liposomes and the targeting of this drug to lymphatic node macrophages via subcutaneous (s.c.) administration proved to be the efficient way to pro…	Excluded
Structure-activity relationship studies on a series of novel, substituted 1-benzyl-5-phenyltetrazole P2X(7) antagonists	1-Benzyl-5-aryltetrazoles were discovered to be novel antagonists for the P2X(7) receptor. Structure-activity relationship (SAR) studies were conducted around both the benzyl and phenyl moieties. In addition, the importance of the regiochemical substitution on the tetrazole was examined. Compounds were evaluated for activity to inhibit calcium flux in both human and rat recombinant P2X7 cell line…	Excluded
Active immunotherapy with 1E10 anti-idiotype vaccine in patients with small cell lung cancer: Report of a phase I trial	1E10 is an anti-idiotype murine monoclonal antibody (Ab2 MAb) specific to an Ab1 MAb which reacts with NeuGc-containing gangliosides, sulfatides and with antigens expressed in some human tumors. Preparations containing this Ab2 were capable to induce a strong anti-metastatic effect in tumor-bearing mice. We conducted a Phase I clinical trial to evaluate the toxicity and humoral immune response el…	Excluded
Role of neuronal nitric oxide in 1-methyl-4-phenyl-1,2,3,6-tetrahydropyridine (MPTP)-induced dopaminergic neurotoxicity	1-Methyl-4-phenyl-1,2,3,6-tetrahydropyridine (MPTP) causes nigrostriatal dopaminergic pathway damage similar to that observed in Parkinson disease (PD). To study the role of NO radical in MPTP-induced neurotoxicity, we injected MPTP into mice in which nitric oxide synthase (NOS) was inhibited by 7-nitroindazole (7-NI) in a time- and dose-dependent fashion. 7-NI dramatically protected MPTP-injecte…	Excluded
Synthesis, antimicrobial, antioxidant, anti-inflammatory, and analgesic activities of some new 3-(2'-thienyl)pyrazole-based heterocycles	1-Phenyl-3-(thiophen-2-yl)-1H-pyrazole-4-carbaldehyde was used as a synthon for the synthesis of new thiazole and pyrazoline heterocycles having 2-thienylpyrazole moiety. The antimicrobial, anti-inflammatory, and analgesic activities of the synthesized compounds were evaluated using agar diffusion method, carrageenan-induced paw edema, and writhing assays, respectively. It was found that the majo…	Excluded
SYNTHESIS AND STUDY OF THE ANTIPROTOZOAL AND ANTIINFLAMMATORY EFFECT OF 2-3' 4' DIMETHOXYSTYRYL-4-DELTA-DIETHYLAMINO-ALPHA-METHYLBUTYLAMINOQUINAZOLINE AND ITS CHLORO DERIVATIVES	2-(3',4'-Dimethoxystryryl)quinazoline derivatives were synthesized. Their acute toxicity was determined in mice. Antiinflammatory, analgesic and antipyretic properties were studied in rats. Antiprotozoal activity was studied with respect to Leishmania tropical major, Trypanosoma equiperdum, Lamblia muris, Entamoeba histolytica and Trichomonas vaginalis. The experiments were performed with white m…	Excluded
In vitro metabolism of 2-[6-(4-chlorophenyl)-2,2-dimethyl-7-phenyl-2,3-dihydro-1H-pyrrolizin-5-yl] acetic acid (licofelone, ML3000), an inhibitor of cyclooxygenase-1 and -2 and 5-lipoxygenase	2-[6-(4-Chlorophenyl)-2,2-dimethyl-7-phenyl-2,3-dihydro-1H-pyrrolizin-5-yl] acetic acid (licofelone) is a dual inhibitor of both cyclooxygenase isoforms and 5-lipoxygenase and under development for treatment of osteoarthritis. In conventional in vitro assays using liver microsomes and NADPH as cosubstrate, a high metabolic stability of licofelone was observed. In the presence of UDP-glucuronic ac…	Excluded
Breast-cancer osteolysis, bone metastases, and anti-osteolytic effect of aspirin	23 (60%) of 38 human breast carcinomas had significant in-vitro osteolytic activity. All patients presenting with bone metastases or hypercalcaemia had active tumours. Over a subsequent three-year follow-up period, bone metastases did not develop in any of the 15 patients with inactive tumours, and metastases at other sites developed in only 2. Of the 23 patients with active tumours, 7 either had…	Excluded
Anti-allodynic effects of intrathecally and intracerebroventricularly administered 26RFa, an intrinsic agonist for GRP103, in the rat partial sciatic nerve ligation model	26RFa and QRFP are endogenous ligands of GPR103. 26RFa binding sites are widely distributed in the brain and the spinal cord where they are involved in processing pain. In the present study, the effects of intrathecal and intracerebroventricular applications of 26RFa on the level of mechanical allodynia induced by partial sciatic nerve ligation were examined in rats. The level of mechanical allod…	Included
2-Arylidene-4-(4-phenoxy-phenyl)but-3-en-4-olides: Synthesis, reactions and biological activity	2-Arylidene-4-(4-phenoxy-phenyl)but-3-en-4-olides (1-17) were prepared from 3-(4-phenoxy-benzoyl)propionic acid and aromatic aldehydes. Some of the selected butenolides were reacted with ammonia and benzylamine to give corresponding 3-arylidene-5-(4-phenoxyphenyl)-2(3H)-pyrrolones (18-23) and 3-arylidene-5-(4-phenoxy-phenyl)-1-benzyl-2(3H)-pyrrolones (24-29) respectively, which were characterized…	Excluded
Hepatoprotective effect of 2-demethoxycarbonyl-2-ethoxycarbonyl-11-deoxymisoprostol	2-Demethoxycarbonyl-2-ethoxycarbonyl-11-deoxymisoprostol (11-DMP) produces antioxidant effect on the models of toxic hepatitis induced by paracetamol and carbon tetrachloride. The drug normalizes the lipid peroxidation (LPO) prosess in rat liver of the rat and the levels of aspartate aminotransferase (AST) and alanine aminotransferase (ALT) in the rat blood, thus demonstrating hepatoprotective ac…	Excluded
INTRACEREBROVENTRICULAR ALLOXAN REDUCES 2 DEOXY-D-GLUCOSE ANALGESIA	2-Deoxy-D-glucose (2DG) analgesia, mediated in part by endogenous opiate and hypothalamo-hypophysial systems is presumably activated by its stress-related properties. Recently 2DG hyperphagia, but not 2DG hyperglycemia was reduced by central pretreatment with the pancreatic beta-cell toxin, alloxan; this deficit was eliminated by co-administration of 3M D-glucose. The present experiment examined …	Excluded
ANALGESICS PART 8 FLUOROALKYL SUBSTITUTED 2 ETHYLAMINO PYRIMIDINE	2-Ethylaminopyrimidines (3) substituted by fluoroalkyl groups might be obtained through the reaction of ethylguanidine with appropriately substituted .beta.-diketones. Within compound class 3, representatives occurred exhibiting analgesic, antiinflammatory, and antifungal activity in mice.	Excluded
Selective reduction of cis-diamminedichloroplatinum(II) nephrotoxicity by ebselen	2-Phenyl-1,2-benzisoselenazol-3(2H)-one (ebselen) is classified as a relatively nontoxic selenium compound, probably because of its bound selenium moiety. In thiol-rich tissues, such as the kidneys, ebselen is converted into selenol intermediates. Selenols are nucleophilic agents which might be able to react with platinum compounds. The influence of ebselen on cis-diamminedichloroplatinum(II) (ci…	Excluded
NEUROPATHY TARGET ESTERASE INHIBITORS - ENANTIOMERIC SEPARATION AND STEREOSPECIFICITY OF 2-SUBSTITUTED-4H-1,3,2-BENZODIOXAPHOSPHORIN 2-OXIDES	2-Substituted-4H-1,3,2-benzodioxaphosphorin 2-oxides (2-substituted-BDPOs) are known to be potent neuropathy target esterase (NTE) inhibitors (I(50)s for the racemates of 0.2-3 nM) when the 2-substituents are n-alkyl (C-5-C-12), n-alkoxy (C-7-C-10), or p-n-alkylbenzyl (C-3 and C-4) The list of potent inhibitors (I(50)s <3 nM) is expanded by the new n-alkylamino (C-9) and n-alkylthio (C-5, C-7, an…	Excluded
Reactivity and stereospecificity of neuropathy target esterase and alpha-chymotrypsin with 2-substituted-4H-1,3,2-benzodioxaphosphorin 2-oxides	2-Substituted-4H-1,3,2-benzodioxaphosphorin 2-oxides (2-substituted-BDPOs) are of special interest as neuropathy target esterase (NTE) inhibitors because they include not only the neuropathic metabolite of tri-o-cresyl phosphate (the 2-methylphenoxy analog) but also the most potent NTE inhibitors known. These compounds react much faster with NTE than 2 standard inhibitors, O,O-diisopropyl fluorop…	Excluded
Synthesis and biological activity or 3-(5-aryl-3-oxo-2,3-dihydro-2-furanyl)-1,2,3,4-tetrahydro-2-quinoxalones and 2-aroylmethylene quinoxalines	3-(5-Aryl-3-oxo-2,3-dihydro-2-furanyl)-1,2,3,4-tetrahydro-2-quinolones and 2-aroylmethylene-3-methoxycarbonylmethyl-1,2-dihydroquinoxalines were prepared by the reaction of 5-aryl-2-methoxycarbonylmethylene-2,3-dihydro-3 furanones with o-phenylenediamine in the presence of hydrochloric acid (method A). Recyclization of 5-aryl-2-hydroxy-2-methoxycarbonylmethyl-2,3-dihydro-3-furanones or 5-aryl-aro…	Excluded
Discovery of N-(3-(1-Methyl-1,2,3,6-tetrahydropyridin-4-yl)-1H-indol-6-yl) thiophene-2-carboximidamide as a Selective Inhibitor of Human Neuronal Nitric Oxide Synthase (nNOS) for the Treatment of Pain	3,6-Disubstituted indole derivatives were designed, synthesized, and evaluated as inhibitors of human nitric oxide synthase (NOS). Bulky amine containing substitution on the 3-position of the indole ring such as an azabicyclic system showed better selectivity over 5- and 6-membered cyclic amine substitutions. Compound (-)-19 showed the best selectivity for neuronal NOS over endothelial NOS (90-fo…	Excluded
3-[2-cyano-3-(trifluoromethyl)phenoxy]phenyl-4,4,4-trifluoro-1-butanesul fonate (BAY 59-3074): A novel cannabinoid CB1/CB2 receptor partial agonist with antihyperalgesic and antiallodynic effects	3-[2-Cyano-3-(trifluoromethyl) phenoxy] phenyl-4,4,4-trifluoro-1-butanesulfonate ( BAY 59-3074) is a novel, selective cannabinoid CB1/CB2 receptor ligand (K-i = 55.4, 48.3, and 45.5 nM at rat and human cannabinoid CB1 and human CB2 receptors, respectively), with partial agonist properties at these receptors in guanosine 5-[gamma(35)S]-thiophosphate triethyl-ammonium salt ([S-35] GTPgammaS) bindin…	Excluded
Chemistry, biological activity, and chemotherapeutic potential of betulinic acid for the prevention and treatment of cancer and HIV infection	3beta-Hydroxy-lup-20(29)-en-28-oic acid (betulinic acid) is a pentacyclic lupane-type triterpene that is widely distributed throughout the plant kingdom. A variety of biological activities have been ascribed to betulinic acid including anti-inflammatory and in vitro antimalarial effects. However, betulinic acid is most highly regarded for its anti-HIV-1 activity and specific cytotoxicity against …	Excluded
SYNTHESIS AND BIOLOGICAL ACTIVITIES OF 3-ALPHA-S SUBSTITUTED MERCAPTOACETAMIDO-3-ALPHA-N N-DISUBSTITUTED AMINOACETAMIDO-6 8-DIBROMO-2-METHYLQUINAZOLIN-4-3H-ONES	3-Chloracetamido-6, 8-dibromo-2-methyl-quinazolin-4 (3H)-one on reaction with appropriate mercaptan/secondary amine afforded 3-.alpha.-(S-substituted mercaptoacetamido)/3-.varies.-N, (N-disubstituted aminoacetamido)-6, 8-dibromo-2-methyl-quinazolin-4- (3H)-ones respectively. These compounds have been evaluated for their possible antifungal, analgesic and anti-inflammatory activities. A good numbe…	Included
Anti-inflammatory, analgesic and antipyretic 4,6-disubstituted 3-cyanopyridine-2-ones and 3-cyano-2-aminopyridines	3-Cyano-4-(R,R'-aryl)-6(2-hydroxyphenyl)-2-(1H)pyridones 2a-o and 3-cyano-4-(R-R'-aryl)-6-(2-hydroxyphenyl)-2-aminopyridines were synthesized which showed anti-inflammatory and analgesic activity. Electron withdrawing substituents in 2' or 4' position on 4-aryl group of compounds 2 increased the anti-inflammatory activity, with their displacement in the 3' position produced an increase of analges…	Excluded
3F8 monoclonal antibody treatment of patients with stage 4 neuroblastoma: a phase II study	3F8 is an IgG(3) murine monoclonal antibody directed against the ganglioside G(D2). In a phase II study, 3F8 was administered i.v. to 16 patients (pts) who had stage 4 neuroblastoma. Response was seen in bony lesions (2 of 7 pts) and marrow (3 of 8 pts). Acute toxicities of pain, fever, urticaria, hypertension, hypotension and anaphylactoid reactions were self-limited and manageable. Three pts ar…	Excluded
Axoplasmic transport and possible recycling of opiate receptors labelled with 3H-lofentanil	3H-Lofentanil, an extremely potent opiate drug with a very long duration of action was injected intravenously into rats immediately after a ligature had been tied around the vagus nerve. Radioactivity accumulated on both sides of the ligature 24 hours and, to a larger extent, 48 hours after the injection. In contrast, there was no accumulation in animals pretreated with naloxone, neither in ligat…	Excluded
Modulatory effects of HMG-CoA reductase inhibitors in diabetic microangiopathy	3-hydroxy-3-methyl-glutaryl CoA (HMG-CoA) reductase inhibitors or statins are competitive inhibitors of the rate-limiting enzyme in cholesterol biosynthesis. Several large landmark clinical studies have shown a marked reduction of cardiovascular mortality and morbidity in patients treated with statins. Because of the strong association between serum cholesterol levels and coronary artery disease,…	Excluded
Pharmacology of the dual inhibitor of cyclooxygenase and 5-lipoxygenase 3-hydroxy-5-trifluoromethyl-N-(2-(2-thienyl)-2-phenyl-ethenyl)-benzo (b)thiophene-2-carboxamide	3-Hydroxy-5-trifluoromethyl-N-(2-(2-thienyl)-2-phenyl-ethenyl)- benzo (b) thiophene-2-carboxamide (L-652,343) is an inhibitor of cyclooxygenase and 5-lipoxygenase in vitro and inhibits the synthesis of the products of both these pathways in whole cells. L-652,343 is an inhibitor of the acute edema induced by carrageenan in vivo and is active topically in suppressing arachidonic acid induced infla…	Excluded
A single polymorphism in HIV-1 subtype C SP1 is sufficient to confer natural resistance to the maturation inhibitor bevirimat	3-O-(3',3'-Dimethylsuccinyl) betulinic acid (DSB), also known as PA-457, bevirimat (BVM), or MPC-4326, is a novel HIV-1 maturation inhibitor. Unlike protease inhibitors, BVM blocks the cleavage of the Gag capsid precursor (CA-SP1) to mature capsid (CA) protein, resulting in the release of immature, noninfectious viral particles. Despite the novel mechanism of action and initial progress made in s…	Excluded
SYNTHESIS OF 3 SUBSTITUTED THIENO-2 3-D-PYRIMIDIN-4 3H-ONE 2-MERCAPTO ACETIC ACIDS AND THEIR ETHYL ESTERS FOR PHARMACOLOGICAL SCREENING	3-Substituted thieno[2,3-d]pyrimidin-4(3H)-one-2-mercaptoacetic acids and their ethyl esters were synthesized from 2-mercaptothieno[2,3-d]pyrimidin-4(3H)-ones, obtained by cyclization of thienylthioureas in acidic medium. Analgesic, anti-inflammatory and anticonvulsant activities were exhibited by some of these compounds [in mice and rats]. Significant antimicrobial activity was exhibited by thie…	Excluded
Role of the stress kinase pathway in signaling via the T cell costimulatory receptor 4-1BB	4-1BB is a member of the TNFR superfamily expressed on activated CD4+ and CD8+ T cells. 4-1BB can costimulate IL-2 production by resting primary T cells independently of CD28 ligation. In this study, we report signaling events following 4-1BB receptor aggregation using an Ak-restricted costimulation-dependent T cell hybridoma, C8.A3. Aggregation of 4-1BB on the surface of C8.A3 cells induces TNFR…	Excluded
Studies on Synthesis and Pharmacological Activities of 1,2,4-Triazolo[3,4-b]1,3,4-thiadiazoles and their Dihydro Analogues	4-Amino-5-substituted aryl-3-mercapto-1,2,4-triazoles are versatile synthons for constructing various biologically active heterocycles. Starting from 4-amino-5-substituted aryl-3-mercapto-1,2,4-triazole 3a-c, a series of new 3,5-disubstituted-1,2,4-triazolo-[3,4-b]1,3,4-thiadiazoles and their 5,6-dihydrotriazolothiadiazoles were prepared. The structures of all the newly synthesized compounds have…	Excluded
4-AMINOPYRIDINE-SENSITIVE NEUROLOGIC DEFICITS IN PATIENTS WITH SPINAL-CORD INJURY	4-Aminopyridine (4-AP) is a potassium channel blocking agent with the ability to restore conduction in demyelinated internodes of axons of the spinal cord. The present investigation sought to obtain electrophysiologic evidence of the effect of 4-AP in ameliorating central conduction deficits in a group of patients (n = 6) with spinal cord injury (SCI). The group was selected on the basis of havin…	Excluded
4-Hydroxyandrostenedione in treatment of postmenopausal patients with advanced breast cancer	4-hydroxyandrostenedione, a potent inhibitor of the aromatase (oestrogen synthetase) system, was given to 11 patients with metastatic breast cancer. After a single 500 mg intramuscular injection a sustained reduction of serum oestradiol was observed for at least 1 week in all patients in whom the steroid was measured. 4 patients responded to treatment for periods of up to 4 months, and healing of…	Excluded
Identification of NIPSNAP1 as a Nocistatin-interacting Protein Involving Pain Transmission	4-Nitrophenylphosphatase domain and non-neuronal SNAP25-like protein homolog 1 (NIPSNAP1) is a molecule of physiologically unknown function, although it is predominantly expressed in the brain, spinal cord, liver, and kidney. We identified NIPSNAP1 as a protein that interacts with the neuropeptide nocistatin (NST) from synaptosomal membranes of mouse spinal cord using high-performance affinity la…	Excluded
PHARMACOLOGICAL STUDIES ON THE ANTI ASTHMATIC PRINCIPLE OF ESSENTIAL OIL OF ARTEMISIA-ARGYI TERPINENOL 4	4-Terpinenol, the antiasthmatic principle of essential oil of A. argyi, was synthetized. Pharmacological actions of synthetic terpinenol were compared with natural terpinenol and the basic pharmacological actions of them were similar. Terpinenol had antiasthmatic, antiallergic, expectorant, antitussive and bacteriostatic actions. The synthetic terpinenol had no expectorant activity. These effects…	Excluded
5 alpha-reduced neuroactive steroids alleviate thermal and mechanical hyperalgesia in rats with neuropathic pain	5 alpha-reduced neuroactive steroids with selective modulatory action in vitro on T or combined modulatory action on T and GABA(A) currents present in peripheral sensory neurons have been shown to induce potent peripheral analgesia in vivo in intact animals. Although the role of T and GABA(A) currents in pathophysiology of neuropathic pain (NPP) is not established, it appears that blockade of T c…	Included
[Maggot therapy for gangrene and osteomyelitis]	5 patients with diabetic-foot were treated by maggot therapy. The most serious case was in a 75-year-old man who had gangrene and osteomyelitis of the right foot. Proteus mirabilis, Enterococcus sp., Providencia stuartii and Staphylococcus spec. (coagulase positive) were isolated from lesions which did not respond to antibiotic therapy. The patient had twice refused amputation but agreed to maggo…	Excluded
NOVEL ANALGESIC ANTIINFLAMMATORY SALICYLATES	5-(2,4-Difluorophenyl)salicylic acid, diflunisal appears to be the best compound, in terms of both efficacy and safety, from over 500 salicylates investigated in our laboratories. It is a chemically distinct, nonacetylating salicylic acid, more active than aspirin as an analgesic and antiinflammatory agent and superior in duration of action and therapeutic index. Some recent clinical and biochemi…	Excluded
A facile, aqueous phase green synthetic protocol for the synthesis of 5,9b-dihydro-1H-[1,2,4]triazino[5,6-b]indole-3-ols/5,9b-dihydro-1H-[1,2, 4]triazino[5,6-b]indole-3-thiols	5,9b-Dihydro-1H-[1,2,4]triazino[5,6-b]indole-3-ols/5,9b-dihydro-1H-[1,2, 4]triazino[5,6-b]indole-3-thiols were synthesized for the first time in water under neutral conditions by using isatin, semicarbazide/thiosemicarbazide, mediated by beta-cyclodextrin in excellent yields. beta-Cyclodextrin has been recovered and reused without any loss of catalytic activity. (C) 2011 Elsevier Ltd. All rights …	Excluded
A-366833: A novel nicotinonitrile-substituted 3,6-diazabicyclo[3.2.0]-heptane alpha 4 beta 2 nicotinic acetylcholine receptor selective agonist: Synthesis, analgesic efficacy and tolerability profile in animal models	5-[(1R,5S)-3,6-Diazabicyclo[3.2.0]heptan-6-yl]nicotinonitrile (A-366833) is a novel nicotinic acetylcholine receptor (nAChR) ligand that binds to the agonist-binding site ([H-3]-cytisine) with K-i value of 3.1 nM and exhibits agonist selectivity at alpha 4 beta 2 nAChR relative to the alpha 3 beta 4 nAChR subtype. The analgesic effects of A-366833 were examined across a variety of animal models i…	Included
The protease inhibitor UCF-101 ameliorates streptozotocin-induced mouse cardiomyocyte contractile dysfunction in vitro: role of AMP-activated protein kinase	5-[5-(2-Nitrophenyl) furfuryliodine]-1,3-diphenyl-2-thiobarbituric acid (UCF-101) is a protease inhibitor which was reported to protect against ischaemic heart damage and apoptosis. This study evaluated the impact of UCF-101 on steptozotocin (STZ)-induced diabetic cardiomyocyte dysfunction. Adult FVB mice were made diabetic with a single injection of STZ (200 mg kg(1)). Two weeks after STZ inject…	Excluded
Reduction of pain symptoms in herpes zoster after treatment with Bothrops jararaca venom extract	54 Patients with cutaneous localizations and severe pain from herpes zoster were studied. In a first double-blind phase, 22 patients were treated at random with saline or with the coagulating fraction of a snake venom given intramuscularly. The good results obtained with regard to pain disappearance and healing of cutaneous lesions prompted us to use the same therapy in 32 additional patients wit…	Excluded
In vitro structure-activity relationship and in vivo studies for a novel class of cyclooxygenase-2 inhibitors: 5-aryl-2,2-dialkyl-4-phenyl-3(2H)furanone derivatives	5-Aryl-2,2-dialkyl-4-phenyl-3(2H)furanone derivatives were studied as a novel class of selective cyclooxygenase-2 inhibitors with regard to synthesis, in vitro SAR, antiinflammatory activities, pharmacokinetic considerations, and gastric safety. 1f, a representative compound for methyl sulfone derivatives, showed a COX-2 IC(50) comparable to that of rofecoxib. In case of 20b, a representative com…	Excluded
5'-Alkyl-substituted analogs of 5'-methylthioadenosine as trypanocides	5'-Deoxy-5'-(methylthio)adenosine (MTA) is a by-product of polyamine metabolism and is phosphoryolytically cleaved to adenine and 5-deoxy-5-(methylthio)ribose-1-phosphate (MTR-1-P) by MTA phosphorylase. In eukaryotes, adenine is subsequently salvaged and converted to nucleotides, while MTR-1-P is converted to methionine. We examined 5'-deoxy-5'-substituted analogs of MTA for trypanocidal activity…	Excluded
Interleukin 15 protects against toxicity and potentiates antitumor activity of 5-fluorouracil alone and in combination with leucovorin in rats bearing colorectal cancer	5-Fluorouracil (FUra) modulated by leucovorin (LV) is active in the treatment of colorectal cancer. Diarrhea and stomatitis are the most common dose-limiting toxicities. We have developed a model system in rats bearing a transplantable colon carcinoma sensitive to FUra therapy with dose-limiting toxicity profiles similar to what is observed in patients treated with either daily or weekly schedule…	Excluded
Capecitabine in the management of colorectal cancer	5-Fluorouracil has been a mainstay in the treatment of colorectal cancer for nearlyfive decades; however, the use of oral formulations of the medication has been gaining increasingtraction since capecitabine was approved for use in adjuvant settings by the US Food and DrugAdministration in 2005. The use of capecitabine has since spread to a number of off-label indications,including the treatment …	Excluded
Tolerance and inverse tolerance to the hyperalgesic and analgesic actions, respectively, of the novel analgesic, F 13640	5-HT(1A) receptor activation by the very-high-efficacy, selective 5-HT(1A) receptor agonist F 13640 [(3-Chloro-4-fluoro-phenyl)-[4-fluoro-4-([(5-methyl-pyridin-2-ylmethyl)-amino]-me thyl)piperidin-1-yl]-methanone] was recently discovered to constitute a novel central mechanism of broad-spectrum analgesia that, remarkably, grows rather than decays with chronicity. However, in rodents not exposed t…	Excluded
Is there an experimental basis for the development of ischaemic colitis as a result of 5-HT3 antagonist treatment?	5-HT<sub>3</sub> antagonists are effective treatments for chemotherapy-induced emesis and diarrhoea and urgency and pain associated with irritable bowel syndrome. Reports of ischaemic colitis led to restricted use of the approved drug, alosetron. This article briefly reviews the controversial information from epidemiology and adverse reaction reports and addresses the experimental basis for the d…	Excluded
5-HT3 receptors	5-HT<sub>3</sub>-receptor antagonists are highly selective competitive inhibitors of the 5-HT<sub>3</sub>-receptor with negligible affinity for other receptors. They are potent, rapidly absorbed and easily penetrate the blood-brain barrier; metabolized by the cytochrome P450-system with half-lifes varying from 3-10 hours. The compounds investigated so far do not modify normal behaviour in animals…	Excluded
Roles of 5-hydroxytryptamine (5-HT) receptor subtypes in the inhibitory effects of 5-HT on C-fiber responses of spinal wide dynamic range neurons in rats	5-Hydroxytryptamine ( 5-HT; serotonin) plays an important role in the descending control of nociception. 5-HT and its receptors have been extensively studied in the modulation of nociceptive transmission at the spinal level using behavioral tests that may be affected by the effects of 5-HT on motor performance and skin temperature. Using electrophysiological methods, the present study aimed to sy…	Excluded
Therapeutic potentials of 5-HT receptor modulators	5-hydroxytryptamine (5-HT) has become one of the most investigated and complex biogenic amines. The main receptors and their subtypes e.g. 5-HT<sub>1</sub> (5-HT(1A), 5-HT(1B), 5-HT(1D), 5-HT(1E) and 5-HT(1F)), 5-HT<sub>2</sub> (5-HT(2A), 5-HT(2B) and 5-HT(2C)), 5-HT<sub>3</sub> and 5-HT<sub>4</sub> have been identified. Additional receptors e.g., 5-HT<sub>5</sub>, 5-HT<sub>6</sub> and subtypes o…	Excluded
5-HT system in the gut: Roles in the regulation of visceral sensitivity and motor functions	5-Hydroxytryptamine (5-HT) is a major transmitter molecule within the gastrointestinal tract. It is contained in enterochromaffin (EC) cells, which form part of the epithelial lining of the gut and in enteric neurones in the submucosal and myenteric plexuses. 5-HT is present in murine mucosal mast cells in the lamina propria and some studies hove suggested that human mast cells may also contain 5…	Excluded
Potentiation of transient receptor potential V1 functions by the activation of metabotropic 5-HT receptors in rat primary sensory neurons	5-Hydroxytryptamine (5-HT) is one of the major chemical mediators released in injured and inflamed tissue and is capable of inducing hyperalgesia in vivo. However, the cellular mechanisms of 5-HT-induced hyperalgesia remain unclear. Transient receptor potential V1 (TRPV1) plays a pivotal role in nociceptive receptors. In the present study, we determined whether 5-HT changes TRPV1 functions in cul…	Excluded
5-HYDROXYTRYPTAMINE AND 5-HYDROXYTRYPTAMINE-3 RECEPTOR ANTAGONISTS	5-Hydroxytryptamine (5-HT) is present throughout the gastrointestinal tract, which acts as the major reservoir of this substance in the body. Its physiologic role has not been clearly established, although it seems likely that 5-HT is involved in the regulation of aspects of intestinal motility such as peristalsis and the migrating motor complex. In disease states the contribution of 5-HT is perh…	Excluded
Serotonin receptor antagonists induce hyperalgesia without preventing morphine antinociception	5-Hydroxytryptamine (5-HT) receptor blockade by administration of mianserin (1 mg/kg) or metergoline (0.25 mg/kg) shortened the response latencies of rats in the hot-plate (hind-paw lick response) and tail-flick tests, but did not consistently attenuate the antinociceptive effect of morphine (1.25--5.0 mg/kg). Injection of the opiate receptor antagonist naloxone (1 mg/kg) did not change tail-flic…	Excluded
Efficacy of duloxetine, a potent and balanced serotonin-norepinephrine reuptake inhibitor in persistent pain models in rats	5-Hydroxytryptamine (serotonin) (5-HT) and norepinephrine (NE) are implicated in modulating descending inhibitory pain pathways in the central nervous system. Duloxetine is a selective and potent dual 5-HT and NE reuptake inhibitor (SNRI). The ability of duloxetine to antagonize 5-HT depletion in para-chloramphetamine-treated rats was comparable with that of paroxetine, a selective serotonin reup…	Included
6-Phenyl-1H-imidazo[4,5-c]pyridine-4-carbonitrile as cathepsin S inhibitors	6-Phenyl-1H-imidazo[4,5-c]pyridine-4-carbonitrile analogues were identified as potent and selective cathepsin S inhibitor against both purified enzyme and in human JY cell based cellular assays. This core has a very stable thio-trapping nitrile war-head in comparison with the well reported pyrimidine-2-carbonitrile cysteine cathepsin inhibitors. Compound 47 is also very potent in in vivo mouse sp…	Excluded
The relationship between oxidative metabolism and lipid peroxidation in rat liver microsomes	7-Ethoxycoumarin was not found to induce lipid peroxidation in rat liver microsomes, although it was reported to cause lipid peroxidation in rat cultured hepatocytes. The productions of thiobarbituric acid reactive substances (TBARS) and chemiluminescence (CL) in the presence of some drugs including tolbutamide, naproxen and salicylic acid and their oxidation activities were determined. There was…	Excluded
Mechanisms Involved in the Antinociceptive Effects of 7-Hydroxycoumarin	7-Hydroxycoumarin (umbelliferone, 1),:the main metabolite of coumarin, has been,reported to produce potent antinociceptive effects in animal models of pain. However, the biochemical events involved in antinociception mediated by 1 are currently not well understood. In the present study, the mechanisms by Which 1 exerts its pharmacological actions were investigated. Acute pretreatment of mice with…	Excluded
8-Cl-adenosine is an active metabolite of 8-Cl-cAMP responsible for its in vitro antiproliferative effects on CHO mutants hypersensitive to cytostatic drugs	8-Cl-cAMP has been undergoing clinical trials as a potential chemotherapy agent, but there is much discussion in the literature as to whether the active agent is 8-Cl-cAMP itself, or its major metabolite, 8-Cl-adenosine. 8-Cl-cAMP is susceptible to the action of serum enzymes such as phosphodiesterases, and its metabolism when administered to cancer patients raises questions as to the mechanism o…	Excluded
Activation of peripheral kappa opioid receptors inhibits capsaicin-induced thermal nociception in rhesus monkeys	8-Methyl-N-vanillyl-6-nonenamide (capsaicin) was locally applied in the tail of rhesus monkeys to evoke a nociceptive response, thermal allodynia, which was manifested as reduced tail-withdrawal latencies in normally innocuous 46 degrees C water. Coadministration of three kappa opioid ligands, U50,488 (3.2-100 mu g), brematocine (0.1-3.2 mu g), and dynorphin A(1-13) (3.2-100 mu g), with capsaicin…	Excluded
Phase I clinical investigation of 9,10-anthracenedicarboxaldehyde Bis[(4,5-dihydro-1H-imidazol-2-yl)hydrazone] dihydrochloride with correlative in vitro human tumor clonogenic assay	9,10-Anthracenedicarboxaldehyde bis([4,5-dihyro-1H-imidazol-2-yl)hydrazone] dihydrochloride (bisantrene) is a new antracene bishydrazone derivative which was entered into a Phase I clinical trial (one dose weekly for 3 weeks) because it showed significant antitumor activity in a number of animal tumor models and in vitro in the human tumor stem cell assay. When possible, patients were entered int…	Excluded
Safety, pharmacokinetics, and antiretroviral activity of intravenous 9- [2-(R)-(phosphonomethoxy)propyl]adenine, a novel anti-human immunodeficiency virus (HIV) therapy, in HIV-infected adults	9-[2-(R)-(Phosphonomethoxy)propyl]adenine (PMPA) is a nucleotide analogue with potent antiretroviral activity in vitro and in simian models. A randomized, double-blind, placebo-controlled, dose-escalation clinical trial of intravenous PMPA monotherapy was conducted in 20 human immunodeficiency virus (HIV)-infected adults with CD4 cell counts of <=200 cells/mm<sup>3</sup> and plasma HIV RNA levels…	Excluded
Phase I clinical investigation of 9-beta-D-arabinofuranosyl-2-fluoroadenine 5'-monophosphate (NSC 312887), a new purine antimetabolite	9-beta-D-Arabinofuranosyl-2-fluoroadenine 5'-monophosphate (NSC 312887) is a new purine antimetabolite that has been evaluated in a Phase I clinical trial. The schedule of administration consisted of a single i.v. infusion over a period of 30 min once each day for 5 consecutive days, repeated at 4-week intervals. Thirteen patients received 30 courses of the drug in a dose range of 18 to 40 mg/sq …	Excluded
Anti-inflammatory activity and conformational behavior of a branched (1 leads to 3)-beta-D-glucan from an alkaline extract of Dictyophora indusiata Fisch	A (1 leads to 6)-branched (1 leads to 3)-beta-D-glucan (T-5-N), isolated from a M sodium hydroxide extract of the fruit bodies of Dictyophora indusita Fisch., markedly exhibited anti-inflammatory effects on both carrageenan-induced edema and scalded edematous hyperalgesia in rat's hindpaws. The activities of T-5-N (25 mg/kg i.p. X 2) were more potent than those of phenylbutazone (25-50 mg/kg i.p.…	Excluded
VAGINAL RUPTURE AND EVISCERATION IN A DOG	A 1.5-year-old German Shepherd mixed breed dog was admitted with mild haemorrhage from the vulva and a perineal mass of 24-hour duration, which had been first observed immediately after parturition. Parturition had occurred at low ambient temperature, and only one puppy survived out of the seven oversized fetuses. The dog was in poor body condition, dehydrated, hypothermic, depressed, non-ambulat…	Excluded
Osteochondromatosis of the cervical spine causing compressive myelopathy in a dog	A 10-month-old Alaskan malamute presented with cervical pain and hindlimb proprioceptive deficits. Plain and myelographic radiographic studies of the cervical spine demonstrated extradural compression of the spinal cord at the level of C7 and C5. Computed tomography assisted presurgical characterisation of the lesions as osteochondromatosis. Laminectomy permitted successful removal of the lesions.	Excluded
Osteomyelitis and arthrosynovitis associated with Leishmania donovani infection in a dog	A 10-month-old male maremma shepherd dog was presented with chronic diarrhoea, moderate polyuria/polydipsia, lethargy, dysorexia and stiffness. Pain was elicited in the distal parts of all four limbs. Radiographs of the limbs showed increased endomedullary radiopacity and lysis, with thick periosteal proliferations at the metadiaphyseal areas of each radius-ulna and tibia and of the distal metaca…	Excluded
Bold fusion: transtracheal wash from a Jersey calf	A 10-week-old, female, Jersey calf was referred to the University of Minnesota Veterinary Medical Center for evaluation of difficult breathing and inappetence of 18-hours duration. Cytologic examination of a transtracheal wash specimen revealed pyogranulomatous inflammation, with increased numbers of multinucleated cells. Differential diagnoses included established bacterial infection, viral infe…	Excluded
Polyostotic lymphoma with vertebral involvement and spinal extradural compression in a dog	A 10-year-old, male, mixed-breed dog that developed cervical pain and neurological deficits was diagnosed with primary lymphoma of the second cervical vertebra. The cervical lesion was not surgically resectable. A dorsal cervical hemilaminectomy was performed to provide temporary decompression. The dog had complete pain relief after surgery but was euthanized 6 weeks later with recurrent clinical…	Excluded
A 12-year-old boy with acute gastroenteritis caused by Edwardsiella tarda O4:H4	A 12-year-old boy was brought to the hospital with a 3-week history of watery diarrhea mixed with mucus and colicky abdominal pain. Stool culture identified Edwardsiella tarda O4: H4, and no other pathogenic bacteria were detected. Acute gastroenteritis caused by Edwardsiella tarda O4: H4 was diagnosed. This bacterium was shown to be sensitive to ampicillin hydrate. When this antibiotic was admin…	Excluded
Parosteal osteosarcoma of the cervical vertebra in a dog	A 12-year-old Maltese terrier was evaluated for progressive tetraparesis and neck pain. On radiographs, there was a periosteal reaction involving the fourth cervical vertebra. Myelographically, there was extradural compression of the spinal cord associated with the lesion. The dog was euthanized and necropsied. Histopathologic diagnosis was parosteal osteosarcoma of the vertebra.	Excluded
Chylothorax due to Hodgkin's disease	A 13-year-old girl presented with a one week history of chest pain, dry cough, difficulty breathing, orthopnea and easy fatigability. There had been no fever or any significant past medical history. PPD was negative. On physical examination, the patient was in pain and in mild respiratory distress, with a respiratory rate of 40/minute and temperature of 36.7degreeC. There was dullness to percussi…	Excluded
Cystic nasal adenocarcinoma in a cat treated with piroxicam and chemoembolization	A 13-year-old, castrated male Siamese cat was presented with a 4-month history of recurrent seizures and bilateral conjunctivitis and rhinitis. Computed tomography of the brain and nose revealed a cystic lesion in the cranial cavity that compressed the brain and invaded the nose. Nasal biopsy revealed a nasal adenocarcinoma. The cat was treated with intermittent antibiotics, phenobarbital, piroxi…	Excluded
Cystic nasal adenocarcinoma in a cat treated with piroxicam and chemoembolization	A 13-year-old, castrated male Siamese cat was presented with a pi month history of recurrent seizures and bilateral conjunctivitis and rhinitis. Computed tomography of the brain and nose revealed a cystic lesion in the cranial cavity that compressed the brain and invaded the nose. Nasal biopsy revealed a nasal adenocarcinoma. The cat was treated with intermittent antibiotics, phenobarbital, pirox…	Excluded
A case of juvenile pulmonary actinomycosis. [Japanese]	A 13-yr-old girl presented with a history of right anterior chest pain for one year. X-ray examination showed a mass in the right lower hilar region with a coarse streaked appearance and an irregular edge. Malignancy was suspected, but after thoracotomy, a diagnosis of pulmonary actinomycosis was made histologically. Chemotherapy with AB-Pc Antimycotic obtained the cure.	Excluded
Primary hemangiosarcoma of the humerus in a Maltese dog	A 14-year-old intact male Maltese dog was presented with a history of pain and swelling of the left upper forelimb and lameness for 3 weeks. Hematological and radiographical examinations showed regenerative anemia and osteolysis of the humerus. Fine needle aspiration biopsy detected epithelioid- and fibroblast-like anaplastic cells with blood components. A hemorrhagic and osteolytic malignant tum…	Excluded
Extranodal B-cell lymphoma in the urinary bladder with cytological evidence of concurrent involvement of the gall bladder in a cat	A 15-year-old domestic shorthair cat was presented with severe haematuria, stranguria, anorexia and lethargy of 10 days' duration. Physical examination revealed a large painful urinary bladder and pain in the cranial abdomen. Abdominal ultrasound revealed severe generalised mural thickening of both the gall bladder and the urinary bladder. Lymphoma was diagnosed on cytology of urine sediment and …	Excluded
Extradural spinal, bone marrow, and renal nephroblastoma	A 1-year-old, female intact Shetland sheepdog presented with acute onset of neurological signs. Physical examination revealed a large abdominal mass. Neurological examination revealed multifocal disease with neck pain, short-strided forelimbs, and hind-limb paresis with loss of tail and anal tone. Blood work, imaging techniques, cytopathology, and histopathology led to a diagnosis of renal, bone-…	Excluded
Toxic epidermal necrolysis in two rhesus macaques (Macaca mulatta) after administration of rituximab	A 2- and a 7-year-old rhesus macaque developed toxic epidermal necrolysis (TEN) after administration of rituximab. Rituximab, a chimeric monoclonal antibody (mAb) directed against the CD20 antigen on B lymphocytes, is used to treat certain B cell neoplasias. The macaques were part of a gene therapy study that involved administering an adeno-associated viral vector encoding human factor IX (hFIX) …	Excluded
Successful treatment of cryptococcal pneumonia in a pony mare	A 20-year-old Welsh Mountain Pony (212 kg) mare was initially presented for a chronic cough, fever, weight loss and low grade abdominal pain. She later developed dyspnoea, tachypnoea and exercise intolerance. The presence of multiple masses (up to 17 cm diameter) in the pulmonary parenchyma was established using lateral thoracic radiography and transthoracic ultrasonography. Encapsulated, budding…	Excluded
An unusual association of pemphigus vulgaris with hyperprolactinemia	A 21-year-old unmarried woman presented with oral ulcerations and generalized, itchy, fluid-filled, skin lesions of 10 days' duration. The lesions ruptured spontaneously, resulting in extensive denuded areas covered by crusts. One month prior to this, she experienced pain and enlargement of both breasts with galactorrhea. Her menstrual cycles were normal initially, but later she developed menstru…	Excluded
Wells' syndrome: Vesiculobullous presentation and possible role of ectoparasites	A 21-year-old woman with recurrent skin lesions present since December 1992 was seen at the University of Alberta hospitals in 1994. The skin lesions consisted of pruritic, painful, erythematous, ''beefy'' plaques on the trunk and extremities and also of vesicles, bullae, and pustules on the ankles and hands. She experienced numerous flare-ups of her eruption that required hospital admission on f…	Excluded
A case of anaplastic large cell lymphoma: when you hear hoof beats, sometimes consider zebras, not horses	A 22-year-old man presented with fever, lymphadenopathy and abdominal pain. With a travel history and considering the young age of the patient, an infective aetiology was thought most likely. Investigations yielded no evidence of infection. Given the increasing severity of the symptoms a neoplastic cause was subsequently considered. Following abdominal ultrasound and CT a lymph node and bone marr…	Excluded
Neurologic signs and hyperammonemia in a horse with colic	A 23-year-old Thoroughbred gelding was referred for the evaluation of acute onset of ataxia and depression, and a 2-day history of fever. On physical examination, the gelding was profoundly depressed and 10-12% dehydrated. The horse appeared very unstable, with a wide-based stance in the hind limbs, severe symmetric ataxia in all 4 limbs, and proprioceptive deficits in both hind limbs. Nasogastri…	Excluded
Necrotizing pneumonitis and empyema caused by Streptococcus cremoris from milk	A 24-year-old heterosexual male, HIV-infected intravenous drug addict, with necrotizing pneumonitis and empyema due to Streptococcus cremoris is presented. The patient had fever, severe dyspnea and chest pain. Chest roentgenogram demonstrated pleural effusion on the left side. A thoracocentesis revealed purulent exudate and S. cremoris was isolated. Fever and pleural effusion disappeared with pen…	Excluded
Superficial cutaneous sporotrichosis in specific anergic patient	A 25-year-old man from Coscomatepec, Veracruz (400 km south-east of Mexico City), and currently resident at this location, presented with dermatosis on the face, affecting the frontal region, dorsum of the nose, and malar region, composed of two nodular or verrucose plaques with an irregular diameter and form, with infiltrated borders, ulcerations, and bloody and honey crusts; the plaques develop…	Excluded
Lepromatous leprosy and reversal reaction in a Micronesian immigrant	A 25-year-old Micronesian man from the island of Otia developed erythematous plaques on his legs. He was diagnosed with erythema nodosum and treated with systemic prednisone. Two months later, he presented with erythematous nodules on his forehead, cheeks, and chin (Fig. 1). Examination revealed scattered violaceous papules on his chest, arms, forearms, hands, and feet, and deep purple macules on…	Excluded
EMPYEMA THORACIS DUE TO NOCARDIOSIS AND MYCOBACTERIUM TUBERCULOSIS MIXED INFECTIONS IN AN AIDS PATIENT	A 26-year-old Thai man presented with progressive dyspnea for four months and right pleuritic chest pain two days before admission. The chest radiograph showed massive right pleural effusion. Thoracentesis was done, and the Culture grew Nocardia spp as well as positive strain for acid-fast bacilli. An anti-HIV test was reactive, with a CD4 count of 12 cells/mm(3). The patient was treated with int…	Excluded
Primitive neuroectodermal tumor of the kidney. Case report	A 27 years old female presented with diffuse abdominal pain, malaise, weight loss and a palpable mass in the left abdomen. Abdominal CAT scan showed a 18 cm heterogeneous tumoral mass that originated in the kidney. The patient was operated on and it was not possible to completely remove the mass. In the postoperative period the patient received chemotherapy with vincristine, cyclophosphamide and …	Excluded
Large gastrointestinal stromal tumor size does not imply early recurrence	A 28-year-old female presented with a huge intra-abdominal mass. Initially a mesenteric mass was diagnosed, but her tumor was found to be a gastrointestinal stromal tumor (GIST). Laparotomy was performed. The mass was resected en bloc with clear surgical margins in January 2007. It was found to be 20 x 18 x 16 cm. In order to remove the tumor, the left half of transverse colon with its mesocolon,…	Excluded
[Fasciola hepatica--a unusual cause of acute cholecystitis with cholestatic jaundice]	A 29-year-old patient was admitted with acute abdomen in the 17th week of pregnancy. History revealed two episodes of colic in the right hypochondriac area during the previous six months, but no other abdominal complaints. Clinically the picture was that of acute cholecystitis. Laboratory findings included an elevated white cell count, a slight elevation of serum transaminases and a marked increa…	Excluded
MEDICAL MANAGEMENT OF MULTIPLE TRAUMATIC VERTEBRAL SUBLUXATIONS AND FRACTURES IN A RABBIT (ORYCTOLAGUS CUNICULUS)	A 2-year-old castrated male Holland lop rabbit (Oryctolagus cuniculus) was presented for loss of hind limb motor function after leaping from the owner's arms. Results of a neurologic examination revealed appropriate mentation, normal thoracic limb posture and gait, paralysis in the right pelvic limb, and voluntary movement of the left pelvic limb. Superficial pain perception and withdrawal reflex…	Excluded
Osteomyelitis of the pelvis caused by Rhodococcus equi in a two-year-old horse	A 2-year-old female Quarter Horse was evaluated for hind limb lameness, fever (40degreeC (104degreeF)), and lethargy of 2 weeks' duration. Hypoproteinemia characterized by hypoalbuminemia and hyperfibrinogenemia was detected. Abdominal ultrasonography revealed thickening of the right dorsal colon wall. Treatment was instituted for putative right dorsal colitis. Lameness evaluation localized signs…	Excluded
Diarrhea and hyperammonemia in a horse with progressive neurologic signs	A 2-year-old, Quarter Horse filly was referred to Michigan State University, Veterinary Teaching Hospital with a 2-3 day history of depression and partial anorexia progressing to severe, watery diarrhea with severe neurologic abnormalities, including repetitive muscle fasciculations, muscle stiffening, and collapse. Laboratory findings included severe polycythemia, neutropenia, metabolic acidosis…	Excluded
Lipodermatosclerosis: a postphlebitic syndrome	A 30-year-old businessman, weighing 94 kg, presented with pigmentation and skin changes extending from the calf to the dorsum of the left foot, One year ago, the patient noticed erythema around the medial malleolus and edema of the ankle, following trauma while starting a bike. The patient was afebrile during the event. He gave no history suggestive of muscle weakness, cramping calf pains at rest…	Excluded
Cutaneous histoplasmosis associated with acquired immunodeficiency syndrome (AIDS)	A 30-year-old man, who had originally been admitted to the Centro Dermatologico Pascua for medical attention and was later transferred to the Hospital General de Mexico, presented with a 2-month history of progressive dermatosis affecting the head (face, ear lobes, oral cavity), trunk (all faces), upper and lower limbs (including the palms and soles), external genitalia, and the perianal region. …	Excluded
Gabapentin for chronic pain in spinal cord injury: A case report	A 30-year-old white woman with an L1 complete spinal cord injury (SCI) secondary to a gunshot wound in 1985, presented to a chronic pain service for evaluation. She had a 13-year history of chronic lower extremity pain. She described her discomfort as "throbbing, aching, and stabbing." She had tried many different medications, including opioids, Tegretol, and tricyclic antidepressants, without su…	Excluded
Lung carcinoma with congenital plantar keratoderma as a variant of Clarke-Howel-Evans syndrome	A 32-year-old man was admitted to the Magdeburg University Hospital with icterus and for further diagnosis of suspected hepatitis. He also complained of generalized pruritus, abdominal pain, nausea, and diarrhea. The patient's history revealed the excision of a lymph node metastasis of the left groin showing pleomorphic macrocellular infiltrates, 2 months previously. The patient presented to our …	Excluded
LYMPHOCYTIC LYMPHOMA HYPER EOSINOPHILIA AND ENDO MYO CARDIAL FIBROSIS	A 32-yr-old man presented with left hypochondrial pain and myalgia. On examination he was found to have widespread lymphadenopathy and splenomegaly, and lymph node biopsy revealed diffuse lymphocytic lymphoma of the small cleaved cell type. There was hypereosinophilia (20 .times. 109/l). The patient was initially treated with chlorambucil and prednisone, which controlled the lymphoma for 9 mo. bu…	Excluded
Syringomyelia, a new indication for medullar stimulation?: Case reporting. [Spanish]	A 33-year-old patient with personal background of syringomyelia (1.5-cm long cavity at the level C7 diagnosed by NMR and CAT), and with burning and lacerating neuropathic pain at the cervical level, irradiating to the left upper limb, that caused severe functional disability. This painful condition had two years of evolution and a severity VAS (Visual Analogical Scale) score of 8. The patient had…	Excluded
Multisystem involvement of microfilaria in a HIV positive patient	A 35-year-old HIV positive male presented with dyspnoea and chest pain was diagnosed having acute pericardial and pleural effusion. Microfilaria was detected from blood as well as from the pericardial and pleural fluid and from urine. CD4 count was 123 cells microl. The patient was receiving treatment with antiretroviral therapy and Cotrimoxazole for last 4 months. The patient had no opportunisti…	Excluded
HIV-ASSOCIATED HISTOPLASMOSIS WITH PULMONARY MANIFESTATIONS	A 35-year-old man developed weight loss, lower abdominal pain, diarrhoea, cough, fever and general deterioration in his health. He had been born and resident in the USA until 1991, when he moved to Germany. Since 1991 he had known that he was HIV positive. The chest radiograph showed bilateral diffuse spotty marking and a rounded cardiac silhouette, the latter echo cardiographically due to perica…	Excluded
A case of bovine ketoacidosis in a lactating woman	A 36 year-old 5 weeks postpartum lactating woman presented to the emergency room with severe nausea and vomiting for 48 hours. The patient was found to be in non-diabetic ketoacidosis with a serum pH 6.9 and a HCO3 of <5mEq/L. This condition rapidly improved with the administration of intravenous dextrose and bicarbonate and with the cessation of breast feeding. The course and pathophysiology of …	Excluded
Rhabdomyolysis	A 36-year-old black man was admitted for the first time to the New York Infirmary-Beekman Downtown Hospital with progressive generalized abdominal pain, lethargy, and confusion. The patient's history was fragmentary and was primarily obtained from his relatives. Four to five days prior to admission, the patient had begun to pass dark brown urine, with a subsequent decrease in urine volume. For se…	Excluded
Acute cardiac toxicity associated with high-dose intravenous methotrexate therapy: Case report and review of the literature	A 36-year-old woman was hospitalized for preoperative chemotherapy for osteosarcoma. She received intravenous fluids for 12 hours for volume expansion, then methotrexate 24 g (12 g/m<sup>2</sup>) over 6 hours. This was followed by intravenous leucovorin 200 mg over 1 hour. Two hours after the methotrexate infusion the patient developed chest pain and bradycardia. An electrocardiogram revealed sin…	Excluded
Post-anaesthetic myelopathy in a 3-year-old Friesian gelding	A 3-year old Friesian stallion was referred to the Department of Equine Sciences at Utrecht University with signs of colic. Laparotomy was performed and the stallion was castrated bilaterally because of an incarcerated inguinal hernia. Intestinal resection was not performed. Eight days postoperatively, the horse showed signs of severe colic and was admitted for re-laparotomy. After resection of 1…	Excluded
Antimalarial activity of a 4',5'-unsaturated 5'-fluoroadenosine mechanism-based inhibitor of S-adenosyl-L-homocysteine hydrolase	A 4',5'-unsaturated 5'-fluoroadenosine inhibitor of S-adenosyl-L-homocysteine hydrolase (SAH hydrolase; EC 3.3.1.1), MDL 28842, was found to inhibit markedly the growth of Plasmodium falciparum in vitro and Plasmodium berghei in mice. Inhibition of P. berghei growth was associated with a large increase in the concentration of S-adenosyl-L-homocysteine (SAH) in the erythrocytes of the mice treated…	Excluded
An unusual complication of diabetes mellitus: The zebra that became a horse	A 41-year-old black woman with a history of well-controlled, insulin-dependent diabetes mellitus was in her usual state of relatively good health when she had acute onset of right upper quadrant and epigastric abdominal pain, nausea, and vomiting, Physical examination and laboratory evaluation revealed gastrointestinal hemorrhage, decreased mental status, and acidemia, and emergency exploratory l…	Excluded
Chyluria presenting as milky urine and nephrotic-range proteinuria	A 41-year-old woman was admitted to Harlem Hospital Center for the evaluation of nephrotic-range proteinuria, microhematuria, hypoalbuminemia, and edema. The patient was born in the Dominican Republic and came to the United States 10 years ago. She gave a history of episodic cloudy urine for the past 28 years. Five years before admission during her last pregnancy, she was noted to have proteinuri…	Excluded
First confirmed autochthonous case of human Babesia microti infection in Europe	A 42-year-old female patient with acute myeloid leukemia presented with fever and heavy chest pain after her first cycle of specific chemotherapy. Acute myocardial infarction was excluded, but surprisingly, parasitic inclusions in erythrocytes became obvious in Pappenheim and Giemsa-stained peripheral blood smears. The patient did not remember a tick bite but acknowledged having received several …	Excluded
Sural nerve entrapment after injury to the gastrocnemius: A case report	A 43-year-old man developed progressive calf pain and paresthesias after a strain of the right gastrocnemius muscle. Physical examination revealed sensory loss in the distribution of the sural nerve with a positive Tinel's sign in the posterior calf in the region of his previous injury. Electrodiagnostic studies revealed prolongation of the sural distal latency with reduction of the sensory nerve…	Excluded
Chronicity of neurological features in ciguatera fish poisoning	A 43-year-old woman complained of colicky abdominal pain, followed by numbness, myalgias, and muscle weakness in the four limbs after eating a grouper (Epinepheius spp.). She presented to our hospital 36 hours later with increased myalgias, muscle weakness, and malaise. On examination, the muscle power and sensation in her four limbs appeared to be normal. She was given an intravenous infusion of…	Excluded
Chronicity of neurological features in ciguatera fish poisoning	A 43-year-old woman complained of colicky abdominal pain, followed by numbness, myalgias, and muscle weakness in the four limbs after eating a grouper (Epinepheius spp.). She presented to our hospital 36 hours later with increased myalgias, muscle weakness, and malaise. On examination, the muscle power and sensation in her four limbs appeared to be normal. She was given an intravenous infusion of…	Excluded
Extensive soft-tissue involvement by plasmablastic myeloma arising from displaced humeral fractures	A 44-yr-old man with IgG-lambda multiple myeloma reached a complete response after induction chemotherapy and autologous stem cell transplantation and maintenance therapy with interferon alpha2b and prednisone 4 yr later, he presented an increase in the M-protein plus extramedullary myeloma involvement with sacrum and clivus plasmacytomas. Treatment with bortezomib, cyclophosphamide and dexametha…	Excluded
A CASE OF MALIGNANT HEM ANGIO PERI CYTOMA WITH METASTASES TO THE LEFT LUNG AND THE FORE HEAD	A 48-yr-old man was admitted to the hospital because of hemosputum and left leg pain. Laboratory tests revealed a primary soft tissue tumor on the left with metastases to the left lung and forehead. Surgical resection followed by anti-cancer drug and irradiation by Liniac was performed, and there was a partial transient response. The growth rate of this malignant hemangiopericytoma was so fast th…	Excluded
Cushing syndrome induced by topical betamethasone dipropionate, calcipotriol monohydrate ointment	A 49-year-old gentleman with a lifelong history of chronic plaque psoriasis previously requiring narrowband ultraviolet (UV) B phototherapy for control in 2008 presented via his general practitioner (GP) with ulcerative striae in his right axilla. He had last been seen by dermatology in 2008 and had been recommended to use a rotational topical regimen of alternate weeks of Diprosalic ointment (Sc…	Excluded
Unusual IgM-secreting multiple myeloma in a dog	A 4-year-old castrated male dog was evaluated because of multiple-limb lameness. Signs of pain were elicited during palpation of the regions of the proximal tibial metaphyses and distal left radial diaphysis. Radiography revealed osteolytic lesions of the long bones. Blood analyses revealed hypercalcemia and transient cytopenias. Serum protein electrophoresis did not reveal a monoclonal gammopath…	Excluded
Giant cell tumor of the accessory carpal bone in a dog	A 4-year-old Springer Spaniel was referred because of a 6-week history of progressive left forelimb lameness. A marked pain response was elicited by palpation over the left accessory carpal bone. Radiography revealed a lytic, markedly expansile lesion of the accessory carpal bone. The bone was excised, and pancarpal arthrodesis was performed. Histologic examination of the excised bone revealed gi…	Excluded
Diabetic Ketoacidosis with Concurrent Pancreatitis, Pancreatic beta Islet Cell Tumor, and Adrenal Disease in an Obese Ferret (Mustela putorius furo)	A 5.5-y-old spayed female ferret (Mustela putorius furo) with a history of adrenal disease, respiratory disease, and chronic obesity was evaluated for progressive lethargy and ataxia, diminished appetite, and possible polyuria and polydipsia. Physical examination revealed obesity, lethargy, tachypnea, dyspnea, a pendulous abdomen, significant weakness and ataxia of the hindlimbs, prolonged skin t…	Excluded
Necrotizing fasciitis following transobturator tape procedure: a case report and literature review	A 51-year-old diabetic woman was referred to our unit with a history of increasing pain in her right thigh and gait disturbance, 10 days following surgery for treatment of stress urinary incontinence with a transobturator tape. Examination elicited a tender right thigh associated with swelling and erythema. Inspection of the vagina revealed an exposed mesh through the vaginal erosion. Plain radio…	Excluded
Hyperplasia of the subcutaneous adipose tissue is the primary histopathologic abnormality in lipedematous scalp	A 51-year-old white woman presented with thickening of the scalp located at the vertex and left lateral occiput without hair abnormalities or alopecia. Skin biopsies of the thickened scalp showed thickening of the subcutaneous tissue with proliferation of mature subcutaneous fat cells but no signs of inflammation or hair abnormalities. During 2.5 years of follow-up, scalp thickening progressed ov…	Excluded
ELEVATED PROSTAGLANDIN AND INDOMETHACIN RESPONSIVE HYPER CALCEMIA IN A PATIENT WITH MALIGNANT PHEO CHROMO CYTOMA	A 52 yr old male was referred after orthopedic surgery in 1979 with the chief complaint of right hip pain. Osteolytic changes were seen in the right iliac, pubic and cranial bones on X-ray and were diagnosed as metastatic lesions by iliac bone biopsy. Abdominal aortic angiography and computed tomography revealed a hypervascular soft tissue mass in the left adrenal gland. Serum and urine norepinep…	Excluded
Long-term transfusion of polymerized bovine hemoglobin in a Jehovah's Witness following chemotherapy for myeloid leukemia: A case report	A 52-year-old female Jehovah's Witness presented with relapsed secondary acute myeloid leukemia. Because of chemotherapy-induced anemia, she was infused with the bovine hemoglobin (Hb)-based oxygen carrier HBOC-201 (Biopure) as the sole means of transfusion support. HBOC-201 has only been used for management of acute hemorrhage, and its utility in providing longer term transfusion support is unkn…	Excluded
Transient cauda equina syndrome related to a sacral schwannoma with cauda equine compression after a lumbar epidural block	A 53-year-old man had chronic low back and leg pain for four years without any history of trauma or neurological manifestations. There was a reduction in symptoms after a lumbar epidural block. Two hours later after the procedure, the patient complained of perineal numbness and lower extremity weakness. The neurological evaluation revealed loss of sensation in the saddle area and the posterior as…	Excluded
AN UNUSUAL CASE OF THYMUS DERIVED LYMPHO PROLIFERATIVE DISORDER	A 54 yr old woman with epigastric pain had leukocytosis of 73,000/.mu.l consisting mainly of atypical lymphoid cells with convoluted and cleaved nuclei resembling Sezary cells; the bone marrow aspirate was nondiagnostic. Skin biopsy was unremarkable. The patient also had hypercalcemia and hemolysis with a positive direct Coombs' test, both of short duration. The arterial oxygen tension was decrea…	Excluded
A case of uncommon withdrawal symptoms after a short period of spinal morphine administration	A 54-year-old female with chronic failed back surgery syndrome and pain in the back and the right leg was treated by chronic spinal morphine administration by an external pump. After a positive test instillation over a 3-week period the spinal catheter was removed. Within 24 h the patient developed fever, leucocytosis, impaired sense of smell and allodynia and hyperpathia in all 4 limbs. Infectio…	Excluded
An unusual case of T-cell lymphoproliferative disorder	A 54-year-old woman with epigastric pain had leukocytosis of 73,000/mul consisting mainly of atypical lymphoid cells with convoluted and cleaved nuclei resembling Sezary cells; the bone marrow aspirate was nondiagnostic. Skin biopsy was unremarkable. The patient also had hypercalcemia and hemolysis with a positive direct Coombs' test, both of short duration. The arterial oxygen tension was decrea…	Excluded
Tropical aquarium aquatic dermatoses: bristle worm envenomation	A 55-year-old high school science teacher with diabetes presented with severe pain and swelling of his left hand. He reported receiving a "shock" 2 days earlier while cleaning out his classroom's aquarium with a bare left hand. Thinking it was a "short" in the electrical connections to the aquarium's pump, he disconnected the electrical cord and continued to clean behind the pump mechanism. After…	Excluded
Systemic cryptococcosis with solitary cutaneous lesion in an immunocompetent patient	A 55-year-old white farmer from north-east Brazil presented with a 1-month history of headache and a solitary nodular lesion on his face. He was a smoker and had reported contact with pigeons. He did not complain of any other systemic symptom such as cough or pain. Physical examination of the skin lesion revealed a nodule measuring approximately 3 cm in diameter with central ulceration and overly…	Excluded
Lichenoid nail changes as sole external manifestation of graft vs. host disease	A 56-year-old-man who had refractory anemia with an excess of blasts underwent an allogeneic peripheral blood stem cell transplantation (PBSCT) from his brother after preparation with melphalan and fludarabin. He received GvHD (graft-vs.-host disease) prophylaxis with cyclosporine from day-1 at a daily dose of 5 mg/kg of body weight, The daily dosage was tapered gradually from day +20. On post-PB…	Excluded
[Extrahepatic obstructive jaundice caused by Fasciola hepatica]	A 58 year old female patient with diabetes manifested 30 years ago is reported. She had digestive disorders since 20 years ago, and a diagnosis of cholecystopathy had been established. Furtherly, she had jaundice, acholia and pruritus; this picture remitted spontaneously. During the next year she had again jaundice, epigastric pain and vomitings; this picture also remitted with home rest. Fifteen…	Excluded
Long-term survival after treatment of gastric carcinoma with liver metastases. A case report	A 58-year-old fish dealer presented with epigastric pain. Radiographic and endoscopic studies showed a Borrmann type I gastric carcinoma on the anterior surface of the body of the stomach near the greater curvature, and a metastatic work-up demonstrated two masses in the right lobe of the liver (segment 6 and 8). The preoperative diagnosis was gastric carcinoma with liver metastasis (stage IV). A…	Excluded
Necrotizing fasciitis: delay in diagnosis results in loss of limb	A 58-year-old man presented to the Emergency Room with a 1-day history of severe pain in the left lower extremity preceded by several days of redness and swelling. He denied any history of trauma. He also denied any systemic symptoms including fever and chills. His past medical history was significant for diabetes, hypertension, deep vein thrombosis, and Evans' syndrome, an autoimmune hemolytic a…	Excluded
Common Peroneal Nerve Compression by a Popliteal Venous Aneurysm	A 58-yr-old man with a right foot drop and a sensory change in the right calf and foot, which developed after a bladder operation, was referred to our clinic for an electrodiagnostic evaluation. Neurologic examination showed grade 1 weakness of the right ankle in dorsiflexion, great toe in dorsiflexion, and ankle in eversion. In addition, the patient complained of pain and a tingling sensation in…	Excluded
Colchicine induced rhabdomyolysis	A 59-year-old man with chronic obstructive pulmonary disease (COPD)? atrial fibrillation, and gout developed acute dyspnea, cough, and diffuse muscle aches and pains. He had commenced colchicine (0.6 mg bid po), for the first time, one month earlier for recurrent gout attacks. Clinical examination revealed atrial fibrillation, an exacerbation of his pulmonary disease, render muscles, especially c…	Excluded
Bird-bite infection and pyoderma gangrenosum: A rare combination?	A 59-year-old non-insulin-dependent diabetic lady was attacked by a crow (with both claw and beak) on her lower left leg and foot whilst she was on holiday in Spain. The leg became cellulitic and very painful over the following days. She visited a Spanish orthopaedic surgeon, who took a wound swab for microbiology and prescribed her oral Cefuroxine and Methyleprednisolone. Initially, symptoms imp…	Excluded
Successful Treatment of Necrotizing Fasciitis in the Hind Limb of a Great Dane	A 5-month-old, intact female Great Dane was presented for an acute onset of rapidly progressive lameness, severe pain, and diffuse swelling of the right hind limb. Ultrasound evaluation revealed echogenic fluid pockets extending along fascial planes of the right hind limb, from the proximal femur to the hock. Necrotic soft tissues were debrided, and closed-suction drains were placed. No foreign m…	Excluded
Arthroscopic removal of a palmar radial osteochondroma causing carpal canal syndrome in a horse	A 5-year-old Arabian stallion with moderate effusion in the right carpal canal and intermittent lameness in this limb was diagnosed to have an osteochondroma projecting from the distal portion of the radius into the carpal canal. oral phenylbutazone treatment over the next 3 years allowed the stallion to continue its show career. Right forelimb lameness returned at that time, and ultrasonography …	Excluded
Imaging diagnosis-CT myelography in a dog with intramedullary intervertebral disc herniation	A 5-year-old Chihuahua was examined for peracute pain and paraparesis. Neuroanatomic localization was consistent with a symmetric T3-L3 myelopathy. Computed tomography (CT) of the T9-L5 vertebrae was normal. Myelography disclosed attenuation of the subarachnoid space from T11 to L1, consistent with spinal cord swelling. CT following the myelogram disclosed a focal area of intramedullary iodinated…	Excluded
Use of mandibular symphysiotomy to allow extensive caudal hemimaxillectomy in a dog	A 5-year-old dog was presented with a large caudal maxillary osteosarcoma, which was causing extreme pain on opening of the mouth. The mass was not resectable through a standard oral approach. This article describes the successful use of mandibular symphysiotomy to allow extensive caudal hemimaxillectomy to remove the mass and provide excellent postoperative quality of life for the dog.	Excluded
Intra-Articular Therapy to Treat Septic Arthritis in a Dog	A 6 yr old female spayed Labrador retriever was examined for severe pain and a nonweight-bearing right forelimb lameness due to swelling and wounds with direct communication into the elbow joint. The medical management of beta hemolytic Streptococcus septic arthritis with needle lavage of the joint, systemic and local antibiotic therapy, and analgesic therapy is described. This case provides info…	Excluded
Fracture of L7 vertebral articular facets and pedicles following dorsal laminectomy in a dog	A 6.5-year-old German Shepherd Dog underwent decompressive surgery for cauda equina syndrome. On the basis of intraoperative findings, the dorsal laminectomy was extended from L6 to S2. Partial dorsal annulectomies were also performed on the L6-7 and L7-S1 intervertebral disks. Two weeks following discharge, the dog had an acute onset of signs of pain and worsening of the neurologic status. Radio…	Excluded
Neuropathic pain following hip resurfacing due to a transneural suture	A 60-year-old man developed severe neuropathic pain and foot-drop in his left leg following resurfacing arthroplasty of the left hip. The pain was refractory to all analgesics for 16 months. At exploration, a PDS suture was found passing through the sciatic nerve at several points over 6 cm and terminating in a large knot. After release of the suture and neurolysis there was dramatic and rapid im…	Excluded
Cutaneous HSV-2 infection with serial recurrences at multiple sites	A 60-year-old white male presented to the dermatology clinic in early 1997 complaining of painful, recurrent lesions on his arms, legs, and hands for several months. At presentation, he was noted to have a cluster of erythematous pustulas, on his right thigh and left palm (Fig. 1). He had no systemic complaints, fever, chills or adenopathy. His past medical history included a seizure disorder, ty…	Excluded
An unusual case of knee monoarthritis	A 61-year-old woman, a known case of diabetic nephropathy on chronic ambulatory peritoneal dialysis, presented with acute onset severe pain in the right knee, of 7 days duration. She had red hot and tender knee and was unable to bear weight. The lower half of the right thigh was swollen and tender. Right knee synovial fluid revealed 130 cells/mu L (all lymphocytes). The fluid was negative for cry…	Excluded
Deep neck infection due to a fish bone foreign body in hypopharynx: Report of a case	A 62 year old male complained of throat pain, dysphagia, swelling and pain of the neck after digestion of a foreign body. Neck CT scan findings showed a deep neck infection due to a fishbone in hypopharynx. The patient was treated with surgical removal of foreign body, drainage of the neck, and chemotherapy, and he recovered successfully.	Excluded
Neuropathic ankle fractures	A 65-year-old diabetic female presented with a 3-week history of a left swollen foot after a minor inversion injury and was found to have a minimally displaced fibular fracture. Despite casting and strict instructions to remain non weight bearing, the patient continued to bear weight and later developed a significantly more displaced fracture with a draining ulcer. This injury eventually required…	Excluded
Neuropathic ankle fractures	A 65-year-old diabetic female presented with a 3-week history of a left swollen foot after a minor inversion injury and was found to have a minimally displaced fibular fracture. Despite casting and strict instructions to remain non-weight bearing, the patient continued to bear weight and later developed a significantly more displaced fracture with a draining ulcer. This injury eventually required…	Excluded
Mycobacterium tuberculosis infection of presumed Charcot joint	A 65-year-old male with peripheral neuropathy and small lymphocytic lymphoma presented with erythema and edema of the left foot. A Charcot midfoot was diagnosed and treated with a total contact cast and restricted weight bearing. However, subsequent analysis of bone and synovial fluid months later revealed Mycobacteritan tuberculosis infection.	Excluded
Concurrent mediastinal B cell lymphoma and chronic myeloid leukemia with an unusually favorable response to chemotherapy	A 67-year-old Chinese woman presented with mediastinal B cell lymphoma in 1992 with incidental leukocytosis. Bone marrow and peripheral blood findings confirmed the diagnosis of chronic myeloid leukemia (CML). After combination chemotherapy and radiotherapy for lymphoma, her peripheral blood counts remained normal, and she refused further treatment for nearly six years. Frank hematologic relapse …	Excluded
Psoriasis and side-effects of mesotherapy	A 67-year-old woman was referred to our Department in January 1997 with an isomorphic Koebner response due to mesotherapy. The patient has been affected by psoriasis for 10 years and underwent treatment with Cyclosporine A (4-2 mg/kg/day for 12 weeks) 2 years earlier. Since the previous year plaques were treated only with topical preparations, with mild worsening over the autumn. In December 1996…	Excluded
Diagnosis and surgical management of a fractured atlas in a cat	A 6-month-old male-castrated domestic shorthair cat was presented shortly after being bitten on the neck by a large breed dog. On presentation the cat was non-ambulatory tetraparetic with preserved deep pain perception. Plain radiographs of the neck did not show any abnormalities. Computed tomography was performed and showed a right-sided depressed fracture of the dorsal lamina of the atlas. A pa…	Excluded
High intraosseous pressure as a cause of lameness in a horse with a degloving injury of the metatarsus	A 6-year-old Paint mare undergoing treatment for a degloving injury of the right metatarsus developed a non-weight-bearing lameness 19 days after admission. Diagnostic nerve blocks localized the source of pain to the area between the tarsus and the metatarsophalangeal joint. Radiography of the metatarsus and metatarsophalangeal joint, arthrocentesis of the metatarsophalangeal joint, and ultrasono…	Excluded
Aplastic articular facets in a dog with intervertebral disk rupture of the 12th to 13th thoracic vertebral space	A 6-year-old, female spayed Pomeranian was presented with acute hind-limb paraplegia with the presence of deep pain perception and urinary incontinence. Myelography showed a Hansen type I herniation of the12th to 13th thoracic intervertebral space (T(12-13)). Articular facets of the T(12-13) and T(13) to first lumbar vertebra (L(1)) were absent. The spinal cord was decompressed using a bilateral …	Excluded
Use of operant performance to guide and evaluate medical treatment in an adult male cynomolgus macaque (Macaca fascicularis)	A 6-y-old male cynomolgus macaque presented with noticeable swelling of the left forearm and signs of discomfort, as indicated by nonuse of the arm even in a behavioral task that he previously had been well-motivated to perform. Examination under anesthesia revealed lacerations to the arm. Radiography of the forearm showed no fractures, indicating that the damage was limited to soft tissue. The d…	Excluded
Histiocytic sarcoma and underlying chronic myelomonocytic leukemia: A proposal for the developmental classification of histiocytic sarcoma	A 70-year-old male was admitted because of back pain due to peri-vertebral tumors. The histologic picture of a needle-biopsied tumor specimen showed pleomorphic large cell infiltration into the collagen fibers. On immunohistochemistry, these abnormal cells were positive for CD68, CD163 and lysozyme but negative for CD1a, 21, 30, and S100. Flow cytometric analysis also demonstrated that these cell…	Excluded
Co-existence of cutaneous and presumptive pulmonary alternariosis	A 71-year-old man presented with an asymptomatic lesion on the arm. He was born in rural West Virginia, spent several years in military service in the South Pacific, and is a long-term resident of Maine. He has chronic obstructive pulmonary disease, coronary artery disease, and noninsulin-dependent diabetes melitus. He was evaluated for episodes of hemoptysis by bronchoscopy in 1980 and 1984, but…	Excluded
A case of unilateral double herpes zoster simultaneously involving two dermatomes complicated with motor paralysis. [Japanese]	A 72-year-old Japanese man noticed eruptions with pain on the right upper back in January 2004. The following day, the patient consulted a nearby dermatologist and was administered an analgesic and topical ointment. The same kind of eruptions appeared on the right subcostal and upper abdomen two days later and small vesicles began to form. He was referred to the outpatient section of the dermatol…	Excluded
Hypercalcemic cardiomyopathy associated with primary hyperparathyroidism mimicking primary obstructive hypertrophic cardiomyopathy	A 72-year-old woman presented to hospital with rapidly progressive dyspnea and chest pain on exertion. Physical findings included a grade 3/6 systolic murmur increased by the Valsalva manoeuvre. Transthoracic echocardiography revealed concentric left ventricular hypertrophy, systolic anterior motion of the mitral valve and critical dynamic outflow tract obstruction. The myocardium was strikingly …	Excluded
Mandibular alveolar bone necrosis after trigeminal herpes zoster	A 74-year-old Japanese man, who had pharyngeal cancer at the age of 53 years and had been treated with radiation therapy, was examined by his dentist for oral ulcers with severe pain for 2 days. He was referred to our hospital on the following day and admitted on March 7, 2000. Physical examination revealed vesicles and pustules on the right side of the lower lip, chin, cheek, and external ear. U…	Excluded
Hypercalcemic crisis and leukemoid reaction associated with recurrence of the urinary bladder carcinoma. [Japanese]	A 75 yr old woman received total cystectomy with ileal conduit for spindle and giant cell carcinoma of the urinary bladder on December 20, 1979. Her serum calcium level and white blood counts were within the normal range during the pre- and post-operative hospital period. On May 6, 1980, she was readmitted with complaints of general bone pain, anorexia and disturbance of consciousness. Her serum …	Excluded
Approach to acute renal failure in biopsy proven myeloma cast nephropathy: Is there still a role for plasmapheresis?	A 75-year-old Caucasian man with hypertension and severe, emphysema, presented to the Veterans Administration New York Harbor Health Care System Hospital outpatient clinic, for his bi-yearly physical in March 2003. The patient had a macrocytic anemia and a serum creatinine (Scr) level of 3.3mg per 100 ml (baseline Scr, 0.9 mg per 100 ml 1 month earlier). An outpatient nephrology consultation was …	Excluded
[A patient with Vibrio vulnificus meningoencephalitis]	A 76-year-old man with liver cirrhosis and diabetes mellitus was admitted to our hospital because of bacterial meningoencephalitis. He had eaten raw fish 2 days before onset. He also developed septic shock, disseminated intravascular coagulation, adult respiratory distress syndrome and panophthalmitis of the right eye. Vibrio vulnificus was isolated from the blood culture. Extensive therapy inclu…	Excluded
Primary retroperitoneal abscess extending to the calf	A 77-year-old man with diabetes mellitus presented with a 2-month history of lumbago radiating to the right lower limb as well as high fever spikes. Physical examination revealed a distended abdomen with right lower quadrant tenderness. A computed tomographic scan of the abdomen revealed a large right retroperitoneal cavity contain ing an air-fluid level that was consistent with a gas-producing a…	Excluded
Diabetic gangrene in multiple fingers and toes after a dog bite in an elderly patient with type 2 diabetes	A 78-year-old diabetic woman experienced multiple sites of gangrene not only in fingers that were directly bitten by a dog but also in fingers and toes that had not beenbitten. Her glycemic control was fair and microvascular complications were mild. There were no clinical findings related to angitis, collagenosis or severe infection. The fingers and toes with gangrene were amputated. The patholog…	Excluded
Salmon calcitonin in the treatment of post herpetic neuralgia	A 78-year-old man with severe chronic obstructive pulmonaiy disease presented to our pain medicine clinic for treatment of post herpetic neuralgia. Pharmacotherapy with tricyclic antidepressants, anticonvulsants, tramadol and traditional analgesics had failed, primarily due to adverse drug effects, particularly sedation, dizziness and nausea. Consequently, intravenous salmon calcitonin was admini…	Excluded
Malignant histiocytosis with multiple skin lesions in a dog	A 7-year-old male Yorkshire terrier was examined for multiple plaques and nodules on the skin. The clinical, cytological and histopathological features indicated a malignant histiocytosis. Cytoreductive chemotherapy produced moderate clinical improvement, but died at day 90 after the first admission. Pathological examination revealed the neoplastic histiocytes in the skin as well as in the myocar…	Excluded
Use of low-dose chlorpromazine in conjunction with environmental enrichment to eliminate self-injurious behavior in a rhesus macaque (Macaca mulatta)	A 7-year-old, captive-bred, female rhesus macaque was placed in a quarantine facility upon arrival at our institution. At release from quarantine, she was observed pawing at and chewing on her left cheek. Physical examination revealed ulcerative lesions on the buccal surface of the left cheek. Initial differential diagnoses included Cercopithecine herpesvirus 1 (B virus)-induced lesions and bacte…	Excluded
Progressive neurological signs associated with systemic mastocytosis in a dog	A 9-year-old dog was presented with nonregenerative anaemia and severe thrombocytopenia, diarrhoea, spinal hyperalgesia and progressive hindlimb paresis. A moderately well differentiated cutaneous mast cell tumour (MCT) was removed from the skin of the right elbow along with the enlarged right prescapular lymph node. Due to deterioration of the dog's neurological condition, euthanasia was perform…	Excluded
Acute intraparenchymal spinal cord injury in a cat due to high-rise syndrome	A 9-year-old spayed female Bengal Red cat was evaluated for high-rise syndrome. The cat had paraplegia of the hind limbs, intact reflexes and pain perception, and hyperesthesia in the caudal thoracic area. Mentation, cranial nerve function, forelimb proprioceptive responses, and spinal reflexes were normal. There were no abnormalities on radiographs or computed tomography scan, but magnetic reson…	Excluded
Disseminated liposarcoma in a dog	A 9-year-old, female Mongrel dog was presented for posterior hindlimb weakness, inability to stand, and pain in the lumbosacral and pelvic regions. Radiography revealed a lytic lesion extending from L5 to L6 to the ilium. At necropsy, an 8 x 2 to 3.2 x 3 cm, irregular, white, firm mass was identified extending from the left dorsolateral aspect of the L6 vertebrae to the sacrum, crossing the sacro…	Excluded
INJURY-INDUCED PLASTICITY OF SPINAL REFLEX ACTIVITY - NK1 NEUROKININ RECEPTOR ACTIVATION AND ENHANCED A-FIBER AND C-FIBER MEDIATED RESPONSES IN THE RAT SPINAL-CORD IN-VITRO	A- and C-fiber evoked ventral root potential (VRP) responses have been examined in isolated spinal cord preparations maintained in vitro that were taken from young rats in which behavioral hyperalgesia (thermal and mechanical) was induced following UV irradiation of one hindpaw. Evoked VRPs were compared with those in naive untreated animals. The duration of both the A- and C-fiber evoked VRP was…	Excluded
Injury-induced plasticity of spinal reflex activity: NK1 neurokinin receptor activation and enhanced A- and C-fiber mediated responses in the rat spinal cord in vitro	A- and C-fiber evoked ventral root potential (VRP) responses have been examined in isolated spinal cord preparations maintained in vitro that were taken from young rats in which behavioral hyperalgesia (thermal and mechanical) was induced following UV irradiation of one hindpaw. Evoked VRPs were compared with those in naive untreated animals. The duration of both the A- and C-fiber evoked VRP was…	Excluded
Injury-induced plasticity of spinal reflex activity: NK1 neurokinin receptor activation and enhanced A- and C-fiber mediated responses in the rat spinal cord in vitro	A- and C-fiber evoked ventral root potential (VRP) responses have been examined in isolated spinal cord preparations maintained in vitro that were taken from young rats in which behavioral hyperalgesia (thermal and mechanical) was induced following UV irradiation of one hindpaw. Evoked VRPs were compared with those in naive untreated animals. The duration of both the A- and C-fiber evoked VRP was…	Excluded
Identification of 2-oxo-N-(phenylmethyl)-4-imidazolidinecarboxamide antagonists of the P2X(7) receptor	A backup molecule to compound 2 was sought by targeting the most likely metabolically vulnerable site in this molecule. Compound 18 was subsequently identified as a potent P2X(7) antagonist with very low in vivo clearance and high oral bioavailability in all species examined. Some evidence to support the role of P2X(7) in the etiology of pain is also presented. (C) 2010 Elsevier Ltd. All rights r…	Excluded
Biological activities on T lymphocytes of a baculovirus-expressed chimeric recombinant IgG1 antibody with specificity for the CDR3-like loop on the D1 domain of the CD4 molecule	A baculovirus-expressed chimeric recombinant IgG1 (rIgG1) antibody, with Cgamma1 and Ckappa human constant domains, was derived from the murine monoclonal antibody (mAb) 13B8.2, which is specific for the CDR3-like loop of the CD4 molecule and which inhibits HIV-1 replication. Chimeric rIgG1 antibody 13B8.2 blocked, in a dose-dependent manner, antigen presentation through inhibition of subsequent …	Excluded
Compartmental modelling for magnetic resonance renography	A basic formalism is presented for generating and interpreting compartmental models for dynamic contrast-enhanced MRI data in the kidney. A graphical convention is introduced to represent and design compartmental models in a transparent and physically intuitive manner. A systematic system of notations and a simple set of rules allows direct translation of the graphical representation into a mathe…	Excluded
A combined behavioral physiological method for the assessment of thermal sensibility in the rat	A behavioral and physiological method has been developed to study thermal detection in the rat. Threshold temperatures signaling (1) disruption of a trained behavior (forelimb bar pressing) and (2) increased heart rate were determined using a gradually increasing thermal stimulus delivered to the hindlimb. Response thresholds for disruption of bar press activity (44.8 degrees C) and heart rate el…	Excluded
Morphine and gabapentin decrease mechanical hyperalgesia and escape/avoidance behavior in a rat model of neuropathic pain	A behavioral test paradigm that measures the aversive quality of stimulus-evoked pain in an animal model of neuropathic pain (L5 ligation) was tested for sensitivity to (1) different forces (476 and 202 mN) and frequencies (once every 15 or 30 s) of mechanical stimulation to the hyperalgesic paw and (2) different doses of the common antinociceptive compounds morphine (1 and 10 mg/kg) and gabapent…	Included
Subtype selective NMDA receptor antagonists: Evaluation of some novel alkynyl analogues	A benzylpiperidine analogue with an acetylenic linker, 5-(3-(4-(4-fluorobenzyl)-piperidin-l-yl)-prop-1-ynyl)-1,3-dihydrobenzimi dazol-2-one, was identified as a chemical lead with excellent activity at the NR1A/2B receptor (IC50=3 nM). Efforts to optimize this activity led to focused modifications around the structural motif of 3. The synthesis and SAR studies are discussed.	Excluded
Evidence for an involvement of tachykinins in allodynia in streptozocin-induced diabetic rats	A better knowledge of the pathophysiology of chronic pain could help to improve the treatment of patients with such syndrome. The aim of the present work was to elucidate the possible involvement of spinal substance P and neurokinin A in the mechanical and thermal allodynia observed in streptozocin-induced diabetic rats. A tachykinin NK, receptor antagonist, RP-67,580 ((3aR,7aR)-7,7-diphenyl-2(1-…	Included
New paths to pain relief	A better understanding of the mechanisms by which pain signals are relayed in the nervous system is paving the way for novel treatments.	Excluded
Spinal CCL2 pronociceptive action is no longer effective in CCR2 receptor antagonist-treated rats	A better understanding of the mechanisms linked to chemokine pronociceptive effects is essential for the development of new strategies to better prevent and treat chronic pain. Among chemokines, MCP-1/CCL2 involvement in neuropathic pain processing is now established. However, the mechanisms by which MCP-1/CCL2 exerts its pronociceptive effects are still poorly understood. In the present study, w…	Excluded
Parallel synthesis of a biased library of thiazolidinones as novel sodium channel antagonists	A biased chemical library containing 91 differentially substituted thiazolidinones was prepared in an effort to improve the pharmacology of a known anticonvulsant agent V102862. The collection was prepared in a single step multi-component condensation reaction that produced good yields and very high crude purity (75%-85%). Seven compounds, identified within the library were shown to be more poten…	Excluded
Intrabody-mediated knockout of the high-affinity IL-2 receptor in primary human T cells using a bicistronic lentivirus vector	A bicistronic human immunodeficiency virus type 1 (HIV-1)-based vector is described in which the expression of a selectable marker and a second gene of interest are forcibly coupled by means of an internal ribosome entry site. The vector provides high-level expression of the coselected gene in approximately 90% of transduced cells and has been used to express an endoplasmic reticulum-targeted sin…	Excluded
Determination of pregabalin in human plasma using LC-MS-MS	A bioanalytical method has been developed and validated for determination of pregabalin in human plasma. The analytical method consists in the precipitation of plasma sample with trichloro acetic acid (20% v/v solution in water), followed by the determination of pregabalin by an LC-MS-MS method using gabapentin as internal standard. Separation was achieved on a Gemini C-18 50 mm x 2.0 mm (3 mu m)…	Excluded
Viruses as gene delivery vectors: Application to gene function, target validation, and assay development	A Biochemical Pharmacology Discussion Group Conference, was held at the headquarters of the New York Academy of Sciences on December 4, 2001 as part of an ongoing series designed to highlight and review areas important to modern drug development (Figure 1). Briefly introduced by Tom Kost (GlaxoSmithKline) and Michael Lotze (University of Pittsburgh), the focus was on the intersection of genomics,…	Excluded
Effects of a novel tripeptide on neurological outcomes after spinal cord injury	A biologically active tripeptide [phenylalanine glutamate glycine (feG)] derived from the submandibular gland has anti-inflammatory actions. We have shown that intravenous treatment with feG after spinal cord injury decreases the intraspinal infiltration of leukocytes and associated oxidative damage within 72h after injury. The present study assessed effects of this treatment on chronic neurologi…	Included
Chronobiological effects on action of pharmaceuticals	A brief introductory account of the nature of chronobiological processes is followed by reference to some examples from the literature as well as to the authors' own findings which are indicative of the substantive importance of chromopharmacology to both therapy and research. The point is made that the analgetic or local anaesthesia effects of morphine and lidocaine applications to human individ…	Excluded
Pain genes	A bright blue sky looks about the same to all observers. But in response to noxious stimuli and injuries different people tend to report very different levels of pain. Variability in pain response has traditionally been attributed to psychosocial, cultural and other environmental factors, the main exception being when painful conditions "run in the family", such as for specific types of migraine …	Excluded
Ranolazine attenuates mechanical allodynia associated with demyelination injury	A broad spectrum of agents has been used to treat neuropathic pain. Although many agents produce an analgesic effect, not all neuropathic conditions respond similarly to treatment.We have demonstrated that ranolazine, a cardiotherapeutic agent that blocks voltage-gated sodium channels, Nav 1.4, 1.5, 1.7 and 1.8, is effective in attenuating mechanical hyperalgesia in both inflammatory (CFA) and ne…	Excluded
Pharmacokinetics of clindamycin HCl administered intravenously, intramuscularly and subcutaneously to dogs	A buffered aqueous solution of clindamycin Hcl (200 mg/mL) was injected intravenously (i.v.) intramuscularly (i.m.) and subcutaneously (s.c.) in a non-randomized, partial cross-over trial involving six male and six female dogs. Blood samples were collected at conventional, predetermined time periods and serum drug concentrations were determined by microbiological assay. Dogs were observed clinica…	Excluded
Effect of tetramethylpyrazine on DRG neuron P2X(3) receptor involved in transmitting pain after burn	A burn is a severe injury, and the resulting pain can be very significant. Currently, opioids are the primary method of pain management, but these drugs have side effects; thus, it is of prime focus to research the mechanisms of pain formation and analgesic drugs. Objective: To investigate the effects of tetramethylpyrazine (TMP) on burn pain mediated by the P2X(3) receptor. Methods: First-degree…	Excluded
Miller-Fisher syndrome associated with Campylobacter jejuni bearing lipopolysaccharide molecules that mimic human ganglioside GD(3)	A Campylobacter jejuni strain of serotype O:10 was isolated from a patient who had Miller-Fisher syndrome. In its biochemical reactions and cellular morphology, the isolate was characteristic of typical C. jejuni. Antibodies against extracted lipopolysaccharide (LPS) were detected by passive hemagglutination in the acute- and convalescent-phase patient sera. By sodium dodecyl sulfate-polyacrylami…	Excluded
Role ofspinal phosphatases in cannabinoid-induced anti- nociception in a rodent neuropathic pain model	A cannabinoid receptor type 2 (CBR2) agonist administered intrathecally reduces peripheral nerve injury-induced mechanical hypersensitivity with out ex-hibiting neurological side effects. Using in vitro rat cortical primary microglial cells, we previously observed that a CBR2 agonist induces the expression of MAP kinase phosphatase (MKP)-1 and 3 and reduces p-ERK, TNF expression and microglial mi…	Excluded
The effect of 0.075% Capsaicin cream on nerve conduction	A capsaicin cream was repeatedly applied to rat oral mucosa, and the effect on SEP examined in order to provide an objective assessment of its effect on nerve conduction. 1) There was a significant suppression in wave amplitude after five days of capsaicin cream application. 2) The agent does not cause local inflammation. The above results seem to indicate that application of a 0.075% capsaicin c…	Excluded
COX2 in CNS neural cells mediates mechanical inflammatory pain hypersensitivity in mice	A cardinal feature of peripheral inflammation is pain. The most common way of managing inflammatory pain is to use nonsteroidal antiinflammatory agents (NSAIDs) that reduce prostanoid production, for example, selective inhibitors of COX2. Prostaglandins produced after induction of COX2 in immune cells in inflamed tissue contribute both to the inflammation itself and to pain hypersensitivity, acti…	Excluded
[Guillain-Barre syndrome in a course of early cutaneous type of Lyme borreliosis: diagnostic and therapeutic difficulties]	A case is reported of a 33-year-old man in whom Guillain-Barre syndrome (GBs) developed three weeks after a tick's sting. At the sting site typical for an early cutaneous type of Lyme borreliosis -- erythema migrans -- appeared. The demyelinating polyradiculoneuropathy of GBs occurred after disappearance of erythema migrans, and was manifested by progressive neuropathic symmetrical limb weakness …	Excluded
[Fatal pulmonary edema in a pernicious malaria attack]	A case is reported of a 40-year-old woman presenting with cerebral malaria complicated by an adult respiratory distress syndrome (ARDS). The patient was admitted to the intensive care unit in a coma, scored 5 on the Glasgow scale. Plasmodium falciparum parasitaemia was, at the time, 50%. A continuous intravenous quinine infusion (25 mg.kg-1.day-1) was started, together with the required symptomat…	Excluded
Unusual presentation of Hodgkin's disease mimicking inflammatory bowel disease	A case of a 32-years old man with a long lasting history of inflammatory bowel disease (IBD) is described. He was treated in the past with adequate medical therapy with considerable improvement of the symptoms. However, after the resolution of the last episode of abdominal pain and diarrhoea, because of multiple protruding masses and sub-stenotic regions found during a colonoscopy, the patient un…	Excluded
Recurrent male herpes genitalis with two different strains of herpes simplex virus type 2	A case of a 50-year-old man with recurrent herpes genitalis with two different isolated strains of herpes simplex virus (HSV) type 2 is reported. Morphologically, two types of cytopathic effects (CPE) induced by viruses were observed in the Vero cell cultures, one being a syncytial giant cell formation and the other a rounded cell formation without cell adhesion resembling the CPE induced by ordi…	Excluded
Toxoplasmosis lymphadenitis: Report of a case	A case of cervical lymphadenitis caused by acute toxoplasmosis was reported. The patient was a 20 year-old man and visited our clinic because of multiple neck masses without pain. Palpation of the masses was strongly suggestive of malignant lymphoma. The Ga scintigraphy imaging and pathological examination of a lymph node were unable to diagnose lymphoma. Serological examination by latex agglutin…	Excluded
MRI findings in a dog with discospondlitis caused by Bordetella species	A case of discospondylitis in a dog secondary to Bordetella species, diagnosed early with the assistance of magnetic resonance imaging (MRI), is reported. The history and clinical signs were suggestive of possible discospondylitis. MRI identified changes and allowed a presumptive diagnosis of discospondylitis, which was subsequently confirmed by bacterial culture of biopsy material. Discospondyli…	Excluded
[Chronic endometriosis caused by Trichinella spiralis. Report of a case]	A case of endometrial trichinosis is reported; the patient lived rear Cd. Delicias, Chih., an endemic area for trichinosis. A 38 years old obese, diabetic woman, with high blood pressure, used to eat frequently pork meat and its products; she presented with abnormal genital bleeding, abdominal pain, and pelvic congestion. Histerectomy was performed. Pathological study of the uterus showed Trichin…	Excluded
A Case of Biliary Fascioliasis by Fasciola gigantica in Turkey	A case of Fasciola gigantica-induced biliary obstruction and cholestasis is reported in Turkey. The patient was a 37- year-old woman, and suffered from icterus, ascites, and pain in her right upper abdominal region. A total of 7 living adult flukes were recovered during endoscopic retrograde cholangiopancreatography (ERCP). A single dose of triclabendazole was administered to treat possible remai…	Excluded
Fitz-Hugh-Curtis syndrome verified with laparoscopy: A case report	A case of Fitz-Hugh-Curtis syndrome caused by Chlamydia trachomatis (C. trachomatis) infection was presented. The patient was 34-year-old housewife and her chief complaint was severe hypochondralgia combined with lower abdominal pain and atypical genital bleeding. Leukocytosis and positive CRP test highly suggested intraperitoneal inflammatory disease. C. trachomatis antigen (enzymeimmunoassay) w…	Excluded
Subacute myelo-optico-neuropathy (SMON) following pneumonitis. Serologic confirmation three and a half years after death	A case of fulminant subacute myelooptico-neuropathy that occurred in a native American women following pneumonitis instead of the usual gastrointestinal dysfunction is reported. After the acute stage, which left the patient paraplegic and partially blind, she suffered an exacerbation which resulted in her death 11 months after the onset of illness. Autopsy disclosed symmetric optic and spinal dem…	Excluded
STUDIES ON INTESTINAL TREMATODES IN KOREA 1. A HUMAN CASE OF ECHINOSTOMA-CINETORCHIS INFECTION WITH AN EPIDEMIOLOGICAL INVESTIGATION	A case of human infection with E. cinetorchis was first found in Korea in Feb., 1978 in a 60 yr old woman from Hwasung Gun, Kyunggi Do [South Korea]. She suffered from intermittent abdominal pain for about 1 yr. Stool examination was positive for echinostomatid eggs 3 times during 1 yr. Eight worms were collected after bithionol treatment with cathartics. Collected worms had distinct head collar …	Excluded
Peculiar chondroblastoma involving multiple tarsal bones	A case of peculiar chondroblastoma involving multiple tarsal bones in a 49-year-old woman is described. The patient presented with pain and swelling of the right foot. Radiographs revealed a lytic expansile lesion of medial, intermediate, and lateral cuneiform bones, navicular, cuboid, and tarsal bones of the right foot, indicating a malignant tumor. Biopsies demonstrated a diffuse proliferation …	Excluded
Orbital sporadic Burkitt lymphoma in an adult diabetic African American female and a review of adult orbital cases	A case of sporadic Burkitt lymphoma (sBL) presenting with jaw and lid involvement in a diabetic adult African American female and a review of adult orbital Burkitt lymphoma cases are presented. Lid edema, visual loss, ophthalmoparesis, proptosis, and sinusitis progressed over 4 weeks despite antibiotic and steroid treatment. Upper lid biopsy histopathological evaluation and immunophenotyping reve…	Excluded
Successful combination chemotherapy (cisplatinum, vinblastine, and bleomycin) in the treatment of medulloblastoma disseminated by cerebrospinal fluid: Case report	A case of successful combination chemotherapy using cisplatinum, vinblastine, and bleomycin (PVB therapy) to treat medulloblastoma disseminated by cerebrospinal fluid is presented. In this case, a locally recurrent tumor and several disseminated tumors were seen to decrease in size on CT examinations. Pain in the lower extremities and urinary incontinence improved during three courses of PVB ther…	Excluded
Thoracic vertebral chordoma in a domestic ferret (Mustela putorius furo)	A castrated adult male 1.0-kg domestic ferret (Mustela putorius furo) was referred for evaluation of a mass of >5 mo duration that was associated with the thoracic spine. The ferret had motor dysfunction and no conscious proprioception or pain perception in either hind limb. Segmental reflexes were present. Survey radiography, myelography, and magnetic resonance imaging showed a mass involving th…	Excluded
T lymphocytes play a role in neuropathic pain following peripheral nerve injury in rats	A catastrophic consequence of peripheral nerve injury is the development of abnormal, chronic neuropathic pain. The inflammatory response at the injury site is believed to contribute to the generation and maintenance of such persistent pain. However, the physiological significance and potential contribution of T cells to neuropathic pain remains unclear. Here we show that T cells infiltrate injur…	Included
Effects of clomipramine and desipramine on a C-fiber reflex in rats	A C-fiber nociceptive reflex evoked by electrical stimulation within the territory of the sural nerve, was recorded from the ipsilateral biceps femoris muscle in urethane anesthetized rats. Intravenously administered clomipramine and desipramine produced a dose-dependent depression of the C-fiber reflex. High doses of intrathecal desipramine also inhibited the C-fiber reflex, while similar intrat…	Excluded
'CatWalk' automated quantitative gait analysis as a novel method to assess mechanical allodynia in the rat; a comparison with von Frey testing	A characteristic symptom of neuropathic pain is mechanical allodynia. In animal models of neuropathic pain, mechanical allodynia is often assessed using von Frey filaments. Although the forces applied with these filaments are highly reproducible, there are various disadvantages of using this method. Testing paradigms and definitions of withdrawal threshold are not standardised. Moreover, measurem…	Included
Peripheral nociceptors contribute to oxaliplatin-induced neuropathy	A chemotherapeutic agent, oxaliplatin (OXALI), has neurotoxic effects on the peripheral nervous system and treatment in humans causes peripheral neuropathy. Using an animal model, we analyzed changes in peripheral nociceptors to understand their contributions to sensory abnormalities in OXALI-induced neuropathy. Male rats were habituated, baselined for von Frey thresholds and injected (i.p.) with…	Included
CholinergiC M2, but not M1, receptor immunoreactivity expression diminishes in the anterior cingulate cortex in a neuropathic model of nociception	A cholinergic muscarinic blockade with scopolamine microinjected into the anterior cingulate cortex (ACC) previous to nociceptive stimulation impairs nociceptive related memory. The ACC presents cholinergic input and the expression of muscarinic receptors, with the M1 and M2 being the most abundant. In this study we aimed to determine if there were changes in the ACC regarding M1 and M2 receptor …	Included
Treatment of a chronic allodynia-like response in spinally injured rats: Effects of systemically administered excitatory amino acid receptor antagonists	A chronic allodynia-like response to mechanical stimulation was observed in rats after severe spinal cord ischemia. This allodynia-like response was not relieved by most conventional analgesics used for treating chronic neuropathic pain. The present experiments evaluated the effects of systemically administered excitatory amino acid receptor antagonists, including the non-competitive N-methyl-D-a…	Included
Enhanced excitability of dissociated primary sensory neurons after chronic compression of the dorsal root ganglion in the rat	A chronic compression of the dorsal root ganglion (CCD) produces ipsilateral cutaneous hyperalgesia and allodynia in rats. Intracellular electrophysiological recordings from formerly compressed neurons in the intact dorsal root ganglion (DRG) reveal lower than normal current thresholds (CTs) and abnormal spontaneous activity (SA) (Zhang JM, Song XJ, LaMotte RH. Enhanced excitability of sensory ne…	Excluded
Effects of a chronic compression of the dorsal root ganglion on voltage-gated Na+ and K+ currents in cutaneous afferent neurons	A chronic compression of the dorsal root ganglion (CCD) produces ipsilateral cutaneous hyperalgesia that is associated with an increased excitability of neuronal somata in the compressed ganglion, as evidenced by spontaneous activity and a lower rheobase. We searched for differences in the properties of voltage-gated Na+ and K+ currents between somata of CCD- and control (unoperated) rats. CCD wa…	Included
INFLAMMATORY MEDIATORS ENHANCE ECTOPIC DISCHARGES IN FORMERLY COMPRESSED DORSAL ROOT GANGLIA	A chronic compression of the dorsal root ganglion (CCD) produces ipsilateral tactile allodynia and hyperalgesia; the cell bodies in the ganglion become hyperexcitable-some exhibiting ectopic, spontaneous activity (SA) (e.g. Zhang et al. J. Neurophysiol. 82:3359, 1999). We determined if the SA was modulated by inflammatory mediators.)11 rats received an ipsilateral L4-and L5 CCD and 9 were unopera…	Excluded
Upregulation of the hyperpolarization-activated cation current after chronic compression of the dorsal root ganglion	A chronic compression of the DRG (CCD) produces cutaneous hyperalgesia and an enhanced excitability of neuronal somata in the compressed ganglion. The hyperpolarization-activated current (I-h), present in the somata and axons of DRG neurons, acts to induce a depolarization after a hyperpolarizing event and, if upregulated after CCD, may contribute to enhanced neuronal excitability. Whole-cell pat…	Excluded
Fos-like immunoreactivity increases in the lumbar spinal cord following a chronic constriction injury to the sciatic nerve of rat	A chronic constriction injury (CCI), transection injury, or sham injury to the sciatic nerve was induced in 30 rats. Rats were then sacrificed at 1, 3, 5, 10, and 20 days following injury, and the number of cells immunohistochemically labeled for Fos-like immunoreactivity (Fos-LI) was determined in random sections from the lumbar 4 and 5 (LA and 1,5) spinal segments. Non-parametric statistics (Wi…	Included
ABNORMAL SKIN TEMPERATURE AND ABNORMAL SYMPATHETIC VASOMOTOR INNERVATION IN AN EXPERIMENTAL PAINFUL PERIPHERAL NEUROPATHY	A chronic constriction injury to the sciatic nerve of the rat produces a neuropathic pain syndrome that has many of the symptoms that are seen in humans with painful peripheral neuropathy. In particular, both the clinical and experimental conditions are accompanied by an abnormality of cutaneous temperature regulation in the painful area. A time course study was made of this phenomenon in the exp…	Excluded
Electrophysiological study on primary afferent properties of a chronic constriction nerve injury model in spinal rats	A chronic constriction nerve injury (CCI) model of the rat sciatic nerve is known to exhibit neuropathic pain behavior. The authors conducted electrophysiological analysis for the primary afferent properties of this model in a decerebrate spinal preparation. In the CCI model, electrical transcutaneous stimulation for A-delta and C-fibers showed a low current threshold to elicit the flexion withdr…	Included
Effects of intrathecal vs. systemic clonidine in treating chronic allodynia-like response in spinally injured rats	A chronic pain-like response to innocuous mechanical stimuli (allodynia) was observed in rats after severe spinal cord ischemia, which resembled some painful conditions observed in spinally injured patients. The present studies examined the effects of clonidine, an alpha(2)-adrenoceptor agonist, on this allodynia-like response. Intrathecal (i.t.) clonidine dose-dependently relieved allodynia and …	Included
An in vitro study of ectopic discharge generation and adrenergic sensitivity in the intact, nerve-injured rat dorsal root ganglion	A chronic, loose constriction of the sciatic nerve in rat produces behavioral signs of spontaneous pain and cutaneous hyperalgesia (Bennett and Xie, Pain, 33 (1988) 87-107) as well as an abnormal spontaneous activity and adrenergic sensitivity of certain dorsal root ganglion (DRG) cells with axons in the injured nerve (Kajander et al., Neurosci. Lett., 138 (1992) 225-228; Xie et al., J. Neurophys…	Excluded
Bifunctional anti-human immunodeficiency virus type 1 small molecules with two novel mechanisms of action	A class of betulinic acid derivatives was synthesized to target two critical steps in the human immunodeficiency virus type 1 (HIV-1) replication cycle, entry and maturation. Each mechanism of HIV-1 inhibition is distinct from clinically available anti-HIV therapeutics. The viral determinants of the antientry and antimaturation activities are the bridging sheet of HIV-1 gp120 and the P24/p2 cleav…	Excluded
Novel inhibitors of fatty acid amide hydrolase	A class of bisarylimidazole derivatives are identified as potent inhibitors of the enzyme fatty acid amide hydrolase (FAAH). Compound 17 (IC50 = 2 nM) dose-dependently (0.1-10 mg/kg, iv) potentiates the effects of exogenous anandamide (1 mg/kg, iv) in a rat thermal escape test (Hargreaves test), and shows robust antinociceptive activity in animal models of persistent (formalin test) and neuropath…	Included
Successful treatment of necrotizing fasciitis caused by Vibrio vulnificus	A classic presentation of sepsis secondary to infection with Vibrio vulnificus occurred in an alcoholic man with diabetes who had been wading in the Gulf of Mexico. The patient survived this usually fatal infection because of a high degree of clinical suspicion with aggressive and early intervention. This case illustrates successful therapy for V vulnificus sepsis and reviews the literature regar…	Excluded
The effects of gabapentin on different ligand- and voltage-gated currents in isolated cortical neurons	A clear picture of the mechanisms of action of the anti-epileptic agent gabapentin is far from being accomplished. We have analyzed the effects of gabapentin on ligand- and voltage-gated currents in isolated adult rat cortical neurons. Gabapentin failed to modify glutamate currents and produced a slight reduction of GABA responses. Negligible inhibition of sodium, but consistent inhibition of hig…	Excluded
Blood histamine and solid malignant tumors	A clinical study was performed to determine whether patients with a newly diagnosed solid malignant tumor manifest an alteration in whole-blood histamine level. Our results indicate that such patients have blood histamine nearly three times greater than either normal, healthy individuals or noncancerous disease controls. Following surgical removal of the tumor, blood histamine levels remained hig…	Excluded
The potential cost-effectiveness of vaccination against herpes zoster and post-herpetic neuralgia	A clinical trial has shown that a live-attenuated varicella-zoster virus vaccine is effective against herpes zoster (HZ) and post-herpetic neuralgia (PHN). The aim of this study was to examine the cost-effectiveness of vaccination against HZ and PHN in Canada. A cohort model was developed to estimate the burden of HZ and the cost-effectiveness of HZ vaccination, using Canadian population-based da…	Excluded
Clinical efficacy of Shatapushpa (Anethum sowa Kurz.) powder in the management of Artava kshaya (oligomenorrhoea)	A clinical trial was carried out on 30 oligomenorrhoea [Artava Kshaya] patients aged between 15 and 35 years having complaints of irregular, scanty and painful menstruations. The patients were registered from OPD and IPD of Gopabandhu Ayurveda Mahavidyalaya Puri. They were administrated Satapuspa churna for three months in a dose of 5 g twice daily with cow grita. The specific investigations were…	Excluded
A clinico-epidemiologic profile of herpes zoster in North India	A clinico-epidemiological study of 230 cases of herpes zoster revealed an overall incidence of 0.6 percent. Out of 230 patients, 160 were males and 70 females (male and female ratio being 2.2:1). The maximum incidence was noted in the second and third decades. A higher incidence was observed in the months of March, April, May and then in August, September and October. A confirmative history of ch…	Excluded
VERTEBRAL OSTEOMYELITIS AND MENINGOMYELITIS CAUSED BY PASTEURELLA CANIS IN A DOG - CLINICOPATHOLOGICAL CASE REPORT	A clinicopathological case study of vertebral osteomyelitis caused by Pasteurella canis in a 2.5-year-old male Jack Russell Terrier is presented. The case was characterised by a chronic course with signs of spinal pain and acute paraplegia. The diagnosis was established by radiography, myelography, post-myelographic CT examination, and laboratory tests including routine blood work and cerebrospin…	Excluded
Effect of curcumin on the advanced glycation and cross-linking of collagen in diabetic rats	A close association between increased oxidative stress and hyperglycemia has been postulated to contribute significantly to the accelerated accumulation of advanced glycation end products (AGEs) and the cross-linking of collagen in diabetes mellitus. In the present work, we report the influence of curcumin, an efficient antioxidant, on the level of AGEs and the cross-linking of collagen in diabet…	Excluded
Effects of a monoclonal antibody raised against nerve growth factor on skeletal pain and bone healing after fracture of the C57BL/6J mouse femur	A closed femur fracture pain model was developed in the C57BL/6J mouse. One day after fracture, a monoclonal antibody raised against nerve growth factor (anti-NGF) was delivered intraperitoneally and resulted in a reduction in fracture pain-related behaviors of approximately 50%. Anti-NGF therapy did not interfere with bone healing as assessed by mechanical testing and histomorphometric analysis.…	Excluded
Vaccination of macaques with long-standing SIVmac251 infection lowers the viral set point after cessation of antiretroviral therapy	A cohort of rhesus macaques with long-standing SIVmac251 infection (> or =5 mo) was treated with continuous antiretroviral therapy (ART). A group of eight macaques was vaccinated with or without simultaneous administration of low dose IL-2 with the highly attenuated poxvirus vector (NYVAC) vaccine candidate expressing the SIVmac structural gag-pol-env (gpe) genes and a novel chimeric fusion prote…	Excluded
The cold plate as a test of nociceptive behaviours: Description and application to the study of chronic neuropathic and inflammatory pain models	A cold plate apparatus was designed to test the responses of unrestrained rats to low temperature stimulation of the plantar aspect of the paw. At plate temperatures of 10degreeC and 5degreeC, rats with either chronic constriction injury (CCI) of the sciatic nerve or complete Freund's adjuvant (CFA) induced inflammation of the hindpaw displayed a stereotyped behavior. Brisk lifts of the treated h…	Included
NMDA-receptor antagonist and morphine decrease CRPS-pain and cerebral pain representation	A combination therapy of morphine with an NMDA-receptor antagonist might be more effective than morphine without a NMDA-receptor antagonist for the relief of neuropathic pain in patients with complex regional pain syndrome (CRPS). In order to test the efficacy of this combination therapy we performed a double-blind randomized placebo-controlled study on patients suffering from CRPS of the upper e…	Excluded
Utilization of feline ELISPOT for mapping vaccine epitopes	A commercial feline immunodeficiency virus (FIV) vaccine consisting of inactivated dual-subtype viruses was released in the USA in 2002 and released subsequently over the next 6 years in Canada, Australia, New Zealand, and Japan. Based on the genetic, morphologic, and biochemical similarities between FIV and human immunodeficiency virus-1 (HIV-1), FIV infection of domestic cats is being used as a…	Excluded
Influence of TRPV1 on diabetes-induced alterations in thermal pain sensitivity	A common complication associated with diabetes is painful or painless diabetic peripheral neuropathy (DPN). The mechanisms and determinants responsible for these peripheral neuropathies are poorly understood. Using both streptozotocin (STZ)-induced and transgene-mediated murine models of type 1 diabetes (T1D), we demonstrate that Transient Receptor Potential Vanilloid 1 (TRPV1) expression varies …	Included
Radiation dose estimates of 186Re-hydroxyethylidene diphosphonate for palliation of metastatic osseous lesions: an animal model study	A common complication in patients with breast or prostate cancer is bone metastases causing pain. New radionuclide therapy methods have recently been proposed for palliation, including 186Re-hydroxyethylidene diphosphonate (186Re-HEDP). This paper reports on the local development of 186Re-HEDP and the biodistribution studied in animals for eventual use in patients. Adult dose was computed assumin…	Excluded
Translational control of SEPT9 isoforms is perturbed in disease	A common feature of the mammalian septin gene family is complex genomic architecture with multiple alternate splice variants. Septin 9 has 18 distinct transcripts encoding 15 polypeptides, with two transcripts (SEPT9_v4 and v4*) encoding the same polypeptide. We have previously reported that the ratio of these distinct transcripts is altered in neoplasia, with the v4 transcript being the usual fo…	Excluded
Natriuretic Peptide-Dependent cGMP Signal Pathway Potentiated the Relaxation of Gastric Smooth Muscle in Streptozotocin-Induced Diabetic Rats	A common gastrointestinal complication of diabetes is gastroparesis, and patients with gastroparesis may present with early satiety, nausea, vomiting, bloating, postprandial fullness, or upper abdominal pain. However, the pathogenesis is not clear yet. A recent study indicated that atrial natriuretic peptide (ANP) was secreted from the gastric mucosa and the ANP family plays an inhibitory role in…	Excluded
Two distinctive antinociceptive systems in rats with pathological pain	A common obstacle in clinical management of pathological pain is the poor response to opioid analgesics. We now report that Delta(9)-tetrahydrocannabinol (Delta(9)-THC)-induced antinociception remained effective in rats with pathological pain. The selective central cannabinoid receptor antagonist SR141716A, but not the generic opioid receptor antagonist naloxone, blocked the Delta(9)-THC antinoci…	Included
Injury prior to neurectomy alters the pattern of autotomy in rats. Behavioral evidence of central neural plasticity	A common property of phantom limb pain is that a preamputation lesion continues to be felt in the same location of the phantom limb after amputation. A model of the phantom limb in the rat is provided by sectioning the sciatic and saphenous nerves. This procedure leads to self-mutilation of the denervated hindpaw, a behavior known as autotomy. There is strong evidence that autotomy is a response …	Excluded
Mice congenic for a locus that determines phenotype in the neuroma model of neuropathic pain	A common strategy for identifying physiological processes responsible for pain is to compare animal strains that show high versus low pain phenotype. However, this approach yields only weak inference because most strains differ from one another at a large number of genetic loci. We undertook a congenic breeding program aimed at transposing the gene(s) that confers dominant (low) pain phenotype in…	Included
Supraspinal sensory perception in below-level allodynia after moderate spinal cord contusion in rats	A common, debilitating consequence of spinal cord injury (SCI) is neuropathic pain below the injury. Allodynia-sharp, intense pain to normally innocuous stimuli-is refractory to treatment likely because brain mechanisms of allodynia remain unidentified. Evidence of spared spinothalamic axons in SCI-induced allodynia contradict reports that insensate rats with SCI lack cortical activation using fu…	Excluded
Role of calcium signalling in the development of pain syndromes	A comparative analysis of two models of nociceptive and neuropathic pain in rodents, carrageenan peripheral inflammation of soft tissues and streptozotocin-induced diabetic neuropathy, is presented in the review. Modern concepts on the pathways of transmission of pain information are analyzed. A few aspects of possible involvement at calcium signalling in neurons in the development of pain syndro…	Excluded
Animal models utilized in research on muscular diseases in Japan	A comparative study of human and animal muscular dystrophies revealed a number of differences in clinical symptoms and muscle pathology. In chicken muscular dystrophy (line 413), the white muscle was preferentially involved with striking vacuole formation in the sarcoplasm. Despite massive muscle fiber necrosis with phagocytosis which occurred in large groups in both hamsters (BIO 14.6) and mdx m…	Excluded
[Effects of paracetamol and naproxen on pain syndromes of various genesis]	A comparative study of the effects of two nonsteroidal antiinflammatory drugs paracetamol and naproxen on the pain syndrome models of various etiology showed that paracetamol is more effective in the case of spinal and neuropathic pain syndromes (in which the leading pathogenic mechanisms are related to the formation of hyperactive neuron aggregates in the central nociceptive structures). Naproxe…	Included
Pro-inflammatory effects of bradykinin, sigma-cyclo[Lys1,Gly6]bradykinin and sigma-cyclo-kallidin in the rat	A comparison of the effects of bradykinin (BK), sigma-cyclo-BK and sigma-cyclo-kallidin (sigma-cyclo-KD) to induce oedema, hyperalgesia and blood flow in the rat paw was made. BK produced dose-dependent increases in oedema and blood flow and a reduction in the nociceptive pressure threshold. Sigma-Cyclo-BK and sigma-cyclo-KD were more potent than BK at inducing oedema and increasing blood flow bu…	Excluded
Female rats are more susceptible to the development of neuropathic pain using the partial sciatic nerve ligation (PSNL) model	A comparison study was conducted to determine if a gender difference could be detected using an animal model for causalgia. The sciatic nerve was tightly ligated so that 1/3 to 1/2 of the nerve thickness was trapped by the ligature, just distal to the point at which the posterior biceps semitendinosus nerve branches off the common sciatic nerve. By measuring paw withdrawal from innocuous stimulat…	Included
Role of complement inhibition in topical therapy of muco-cutaneous herpes simplex virus infections	A complement-inhibiting formulation with anti-inflammatory activity due to suppression of both the classical and alternative pathways of complement activation is presented for local treatment of muco-cutaneous lesions produced by Herpes simplex virus, types 1 and 2. The drug contains glutaraldehyde, a strong inhibitor of the complement system, dimethylsulphoxyde, used as a vector modifying the ba…	Excluded
Death in pain: peripheral nerve injury and spinal neurodegenerative mechanisms	A complex network operates in the spinal dorsal horn to integrate peripheral nociceptive inputs with local and descending control mechanisms, and to cross-talk with higher brain areas. Injury to peripheral sensory nerves can trigger a cascade of events within this relay which, in some cases, may turn into abnormal responses outlasting the initial detrimental stimulus and leading to chronic pain. …	Excluded
How does neuropathophysiology affect the signs and symptoms of spinal disease?	A complex relationship exists between back pain and the presence of spinal disease. Particularly in chronic situations, back pain and its behavioural and emotional consequences are as likely to reflect the influence of psychosocial factors as any underlying spinal pathology. Nevertheless, physical factors are clearly important and it is significant that whereas in normal discs only the outer thir…	Excluded
SKIN VASCULAR REACTIVITY TO THE NEUROPEPTIDE SUBSTANCE-P IN RATS WITH PERIPHERAL MONONEUROPATHY	A compression neuropathy model that produces pain-related behaviour in rats was used to investigate changes in skin vascular reactivity in the innervated area. Neuropathy was produced by 4 ligatures tied loosely around the common sciatic nerve. Vascular reactivity was assessed via perfusion of the neuropeptide substance P (SP) over the base of a blister raised on the rat foot pad. Compared to sha…	Excluded
A novel animal model of trigeminal neuralgia	A compression of trigeminal root or ganglion produced prolonged mechanical allodynia and hyperalgesia in the cutaneous territory of the affected nerve. Microinjection of LPA produced demyelination of axonal portion in the trigeminal ganglion as well as dramatic increases in the responses to mechanical stimulation. Based on these observations, the present data provide that compression of the trige…	Included
Discovery and structure-activity relationships of a series of pyroglutamic acid amide antagonists of the P2X(7) receptor	A computational lead-hopping exercise identified compound 4 as a structurally distinct P2X(7) receptor antagonist. Structure-activity relationships (SAR) of a series of pyroglutamic acid amide analogues of 4 were investigated and compound 31 was identified as a potent P2X(7) antagonist with excellent in vivo activity in animal models of pain, and a profile suitable for progression to clinical stu…	Included
Sign-reversal during persistent activation in mu-opioid signal transduction	A concept of signal transduction in biological systems specifies that any instantaneous input is appreciated by its departure from the moving average of past activity. The concept provides an adequate account of the occurrence of both the one-directional (e.g. analgesic) effects induced by opioid receptor activation, and of the contra-directional (e.g. hyperalgesic) effects that can be observed w…	Excluded
CONDITIONING LESIONS ENHANCE GROWTH STATE ONLY IN SENSORY NEURONS LACKING CALCITONIN GENE-RELATED PEPTIDE AND ISOLECTIN B4-BINDING	A conditioning lesion improves regeneration of central and peripheral axons of dorsal root ganglion (DRG) neurons after a subsequent injury by enhancing intrinsic growth capacity. This enhanced growth state is also observed in cultured DRG neurons, which support a more sparsely and rapidly elongating mode of growth after a prior conditioning lesion in vivo. Here we examined differences in the cap…	Excluded
A conditioning lesion promotes in vivo nerve regeneration in the contralateral sciatic nerve of rats	A conditioning lesion in the sciatic nerve increases in vivo axonal regeneration in the nerve after a second transection. We studied whether this increased regeneration also occurs in the contralateral nerve. The left sciatic nerve was transected and sutured in Wistar rats; the nerve was exposed but not transected in controls. After 5 days, the right sciatic nerves of all rats were transected and…	Excluded
Injection of hypertonic saline into musculus infraspinatus resulted in referred pain and sensory disturbances in the ipsilateral upper arm	A confounding factor in the analysis of chronic pain patients is the finding of somatosensory disturbances not only in neuropathic pain patients, but also in a subgroup of patients with musculoskeletal pain. The purpose of the study was to examine if referred pain, induced by intramuscular injections of hypertonic saline (5% NaC1) into the left musculus infraspinatus, resulted in somatosensory al…	Excluded
Consensual reactions to anterior chamber paracentesis in the rabbit	A consensual reaction was consistently obtained in rabbits subjected to unilateral paracentesis. On fluorescein angiography of the anterior segment, we observed that this consensual reaction consisted of a slight to moderate dye extravasation from the ciliary processes into the aqueous. Aspirin usually, but not always, inhibited this reaction. Retrobulbar injection of anesthesia to the injured ey…	Excluded
Antibodies to nerve growth factor reverse established tactile allodynia in rodent models of neuropathic pain without tolerance	A considerable body of evidence implicates endogenous nerve growth factor ( NGF) in conditions in which pain is a prominent feature, including neuropathic pain. However, previous studies of NGF antagonism in animal models of neuropathic pain have examined only the prevention of hyperalgesia and allodynia after injury, whereas the more relevant issue is whether treatment can provide relief of esta…	Included
Development of liposomal amphotericin B formulation	A considerable effort has been spent in the past three decades to investigate various aspects of liposomes as novel drug delivery systems. In 1990, the first amphotericin B (AmB) liposomal preparation (L-AmB) under the brand name AmBisome was introduced into the market by Vestar. The successful marketing of the product moved liposomes out of the stage of experimental obscurity to the realistic st…	Excluded
Clinical experience with sorbinil--an aldose reductase inhibitor	A considerable volume of animal pharmacologic data support the view that increased flux through the polyol pathway provides a unifying hypothesis for the major complications of diabetes. An extensive clinical program has been established to verify the extrapolation of the animal pharmacologic findings to man. Clinical data accumulated to date confirm the biochemical and electrophysiologic effects…	Excluded
Teratogenic exposures	A consideration of teratogenic exposures includes not only an agent (chemical, radiation, biologic) but an exposure level and timing of exposure. There are criteria by which exposures are evaluated for a causal connection with an abnormal outcome. We here review some teratogenic exposures and discuss how they were initially described and confirmed. We have limited our discussion to some of the ex…	Excluded
An experimental painful peripheral neuropathy due to nerve constriction: I. Axonal pathology in the sciatic nerve	A constriction injury to the sciatic nerve of the rat produces a painful peripheral neuropathy that is similar to the conditions seen in man. The pathology of the sciatic nerve in these animals was examined at 10 days postinjury, when the abnormal pain sensations are near maximal severity. The nerves were examined with (1) complete series of silver-stained longitudinal sections of pieces of the n…	Included
Glia as a therapeutic target: selective suppression of human amyloid-beta-induced upregulation of brain proinflammatory cytokine production attenuates neurodegeneration	A corollary of the neuroinflammation hypothesis is that selective suppression of neurotoxic products produced by excessive glial activation will result in neuroprotection. We report here that daily oral administration to mice of the brain-penetrant compound 4,6-diphenyl-3-(4-(pyrimidin-2-yl)piperazin-1-yl)pyridazine (MW01-5-188WH), a selective inhibitor of proinflammatory cytokine production by a…	Excluded
An ovine model for total hip replacement: operative procedure and complications	A cranio-lateral curvilinear incision in the skin was centered over the greater trochanter. The subsequent approach to the acetabulum involved blunt dissection and avoided the need For significant muscular incision. The major post-operative complications encountered were fracturing of the proximal (2/37) and distal femur (4/37), caudal neuropathy (2/37) and septic Femoral stem loosening (1/37). A…	Excluded
Electrochemotherapy--a novel method of cancer treatment	A critical review is presented on a novel method of treating cancer by a combination of an electric field with chemotherapeutic agents. The work described here summarizes the current state of the technique known as electrical impulse chemotherapy (EIC) or electrochemotherapy (ECT). The review discusses in vitro results with specific cell lines, in vivo work on animals and clinical results on pati…	Excluded
Substance P inhibits progesterone conversion to neuroactive metabolites in spinal sensory circuit: A potential component of nociception	A crucial biochemical reaction in vertebrates is progesterone conversion into neuroactive metabolites such as dihydroprogesterone (5 alpha-DHP) and tetrahydroprogesterone (3 alpha,5 alpha-THP), which regulate several neurobiological processes, including stress, depression, neuroprotection, and analgesia. 3 alpha,5 alpha-THP is a potent stimulator of type A receptors of GABA, the main inhibitory n…	Excluded
Antiviral and antiphlogistic activities of Hamamelis virginiana bark	A crude hydroalcoholic extract from Hamamelis virginiana bark was subjected to ultrafiltration (UF) with a cut-off limit of 3 kDa to obtain a higher and a lower molecular weight fraction. Characterisation of the fractions was attempted with TLC, HPLC, acidic hydrolysis, and chromatography over Sephadex LH-20. The UF-concentrate was shown to consist mainly of oligomeric to polymeric proanthocyanid…	Excluded
Pyrazole-based cathepsin S inhibitors with arylalkynes as P1 binding elements	A crystal structure of 1 bound to a Cys25Ser mutant of cathepsin S helped to elucidate the binding mode of a previously disclosed series of pyrazole-based CatS inhibitors and facilitated the design of a new class of arylalkyne analogs. Optimization of the alkyne and tetrahydropyridine portions of the pharmacophore provided potent CatS inhibitors (IC(50) = 40-300 nM), and an X-ray structure of 32 …	Excluded
C-Terminal glycine is crucial for hyperalgesic activity of nociceptin/orphanin FQ-(1-6)	A C-terminal analog of the hexapeptide orphanin FQ/nociceptin-(1-6), [Ala(6)]-orphanin FQ/nociceptin-(1-6), and a pentapeptide orphanin FQ/nociceptin-(1-5) were tested in vivo for their analgesic/hyperalgesic activity in the hot-plate test with rats. Replacement of the C-terminal glycine by L-alanine (Phe-Gly-Gly-Phe-Thr-Ala) in orphanin FQ/nociceptin-(1-6) abolished the hyperalgesic potency of n…	Excluded
Antineoplastic effect of the cyclooxygenase inhibitor meloxicam on canine osteosarcoma cells	A decisive role in cancer development has been attributed to cyclooxygenase-2 (COX-2) activity, but the significance of COX-2 inhibitors in cancer treatment still needs to be thoroughly investigated. We studied the influence of meloxicam, a non-steroidal antiinflammatory drug with preferential inhibitory effects on COX-2 compared to COX-1, on canine osteosarcoma (D-17) cells. We demonstrated that…	Excluded
Clinical and molecular aspects of varicella zoster virus infection	A declining cell-mediated immunity to varicella zoster virus (VZV) with advancing age or immunosuppression results in virus reactivation from latently infected human ganglia anywhere along the neuraxis. Virus reactivation produces zoster, often followed by chronic pain (postherpetic neuralgia or PHN) as well as vasculopathy, myelopathy, retinal necrosis and cerebellitis. VZV reactivation also pro…	Excluded
Hypothalamic mechanisms of pain modulatory actions of cytokines and prostaglandin E2	A decrease and subsequent increase in nociceptive threshold in the whole body are clinical symptoms frequently observed during the course of acute systemic infection. These biphasic changes in nociceptive reactivity are brought about by central signal substances induced by peripheral inflammatory messages. Systemic administration of lipopolysaccharide (LPS) or interleukin-1 beta (IL-1 beta), an e…	Excluded
DECREASE OF NERVE NA+,K+-ATPASE ACTIVITY IN THE PATHOGENESIS OF HUMAN DIABETIC NEUROPATHY	A decrease in Na+,K+-ATPase activity is claimed to play a central role in the pathogenesis of electrophysiological and morphological abnormalities that characterize the neuropathic complications in different animal models of diabetes mellitus. The peripheral nerves from 17 patients with either type I or type II diabetes mellitus were studied to assess the importance of changes in Na+,K+-ATPase ac…	Excluded
Multiple sources of endogenous opioid peptide involved in the hypoglycemic response to 15 Hz electroacupuncture at the Zhongwan acupoint in rats	A decrease in plasma glucose levels was observed in rats which received electroacupuncture (EA) stimulation at the Zhongwan acupoint. In the present study, the role of the adrenal gland in this hypoglycemic response to EA at high frequency (15 Hz) was investigated on adrenalectomized (ADX) normal rats. There was a sharper decrease in plasma glucose by EA stimulation in the fasting ADX group than …	Excluded
THE ROLE OF THE NEUROMA IN AUTOTOMY FOLLOWING SCIATIC NERVE SECTION IN RATS	A delay in the formation of the terminal neuroma following sciatic nerve section in rats was obtained by means of free nerve grafts sutured to the proximal stump of the sectioned sciatic nerve branches. The automutilating behaviour in these animals was statistically compared with that which follows single sciatic section and sciatic section plus end-to-end suture. The results showed that in anima…	Included
A vanadium/aspirin complex controlled release using a poly(beta-propiolactone) film. Effects on osteosarcoma cells	A delivery system for vanadium was developed using poly(beta-propiolactone) (PbetaPL) films. The release kinetics of a complex of vanadium (IV) with aspirin (VOAspi) was evaluated with films prepared from polymers of different molecular weights, as well as with variable drug load. A sustained release of vanadium over 7 days was achieved. The drug release kinetics depends on contributions from two…	Excluded
Nitric oxide synthase and GABA colocalize in lamina II of rat spinal cord	A dense plexus of fibers in the substantia gelatinosa contains nitric oxide synthase (NOS). Using electron microscopic double-labeling immunocytochemistry for NOS combined with GABA or glutamate, we find that all NOS-positive terminals in this region also contain GABA but are not enriched in glutamate. In an attempt to verify that NOS-positive terminals do not originate from primary afferents, we…	Excluded
An epimer of 5'-noraristeromycin and its antiviral properties	A derivative of 5'-noraristeromycin epimeric at the 5'-nor center ((-)-3) has been prepared enantiospecifically in three steps from (+)-((1R,4S)-4-hydroxy-2-cyclopenten- 1-yl acetate. Compound (-)-3 was evaluated for antiviral activity against a large number of viruses and found to display marked activity against varicella-zoster virus, vaccinia virus, vesicular stomatitis virus, parainfluenza vi…	Excluded
Descending serotonergic facilitation mediated through rat spinal 5HT3 receptors is unaltered following carrageenan inflammation	A descending facilitatory drive originating from superficial dorsal horn NK1-expressing neurones and relaying through parabrachial and rostroventral medial medulla to act on deep dorsal horn neurones, mediated through spinal 5HT3 receptors, was recently documented. To determine if this pathway plays a role in the pathophysiology of inflammation, we investigated the effects of spinally administere…	Excluded
Symposium on back problems in the horse. (2) The diagnosis of diseases of the horse's back	A description of some of the clinical features of low back pain in the horse has been given and a number of methods for assisting diagnosis considered. As well as a complete clinical examination both at rest and during exercise, a useful diagnostic aid in some chronic cases was the injection of local anaesthetic into the interspinous spaces. A laboratory examination, including haematological and …	Excluded
A device for simultaneous measurement of pressure and shear force distribution on the plantar surface of the foot	A device has been designed to simultaneously measure the vertical pressure and the anterior-posterior and medial-lateral distributed shearing forces under the plantar surface of the foot. The device uses strain gauge technology and consists of 16 individual transducers (each with a surface area measuring 2.5 x 2.5 cm) arranged in a 4 x 4 array. The sampling frequency is 37 Hz and data may be coll…	Excluded
Tiber einen mit Penicillin behandelten Fall von Weil'scher Krank-heit	A diagnosis of Weil's disease was made by the agglutination test on the 14th day of illness in a 35-yr.-old man who was exposed to rats in a barn. 500,000 U. of penicillin were given from the 13th-17th day of illness following which the pain disappeared and the general condition of the patient improved. On the 4th day after treatment there was a temp, rise and a recurrence of symptoms. Between th…	Excluded
A bioactive sesquiterpene from Bixa orellana	A dichloromethane extract of the air-dried leaves of Bixa orellana afforded ishwarane 1, phytol 2, polyprenol 3, and a mixture of stigmasterol 4a and sitosterol 4b by silica gel chromatography. The structure of 1 was elucidated by extensive 1D and 2D NMR spectroscopy. Compound 1 at three doses (25, 50, and 100 mg/kg BW) was tested for prophylactic, gastrointestinal motility, analgesic, hypoglycem…	Excluded
Behavioral evidence supporting a differential role for spinal group I and II metabotropic glutamate receptors in inflammatory hyperalgesia in sheep	A differential role for metabotropic glutamate receptors (mGluRs) in spinal nociception in normal animals has previously been identified. The present study examined the contribution of group I and group II mGluRs to the development and maintenance of inflammatory hyperalgesia produced by unilateral intradermal injection of carrageenan into the lower forelimb in sheep. Carrageenan (7.5 mg in 500 m…	Excluded
MOR-1-immunoreactive neurons in the dorsal horn of the rat spinal cord: evidence for nonsynaptic innervation by substance P-containing primary afferents and for selective activation by noxious thermal stimuli	A direct action of mu-opioid agonists on neurons in the spinal dorsal horn is thought to contribute to opiate-induced analgesia. In this study we have investigated neurons that express the mu-opioid receptor MOR-1 in rat spinal cord to provide further evidence about their role in nociceptive processing. MOR-1-immunoreactive cells were largely restricted to lamina II, where they comprised approxim…	Excluded
Characterization of rodent models of HIV-gp120 and anti-retroviral-associated neuropathic pain	A distal symmetrical sensory peripheral neuropathy is frequently observed in people living with Human Immunodeficiency Virus Type 1 (HIV-1). This neuropathy can be associated with viral infection alone, probably involving a role for the envelope glycoprotein gp120; or a drug-induced toxic neuropathy associated with the use of nucleoside analogue reverse transcriptase inhibitors as a component of …	Included
Hyperalgesia induced by naloxone follows diurnal rhythm in responsivity to painful stimuli	A diurnal rhythm was observed in the responsiveness of mice to nociceptive stimuli and in the hyperalgesic activity of endogenous opioid peptides and may partly account for previous controversy over the direct action of naloxone in opiate-naive animals.	Excluded
d-Morphine, but not l-morphine, has low micromolar affinity for the non-competitive N-methyl-D-aspartate site in rat forebrain. Possible clinical implications for the management of neuropathic pain	A diverse range of opioids and enantiomers were examined for their ability to displace binding at the [H-3] MK-801-labelled site of the N-methyl-D-aspartate (NMDA) receptor in rat forebrain, displacement which is equatable with noncompetitive NMDA receptor antagonist activity. Surprisingly, d-morphine, but not natural I-morphine, has low micromolar affinity for the site, suggesting clinical poten…	Excluded
Management of liver disease in dogs and cats	A Doberman with jaundice, hepatomegaly and cranial abdominal pain had evidence of centrilobular necrosis on liver biopsy. Therapy with fluids, ampicillin and rest resulted in recovery. A Collie hit by a car developed traumatic hepatopathy and myopathy. The animal recovered with rest as the only treatment. A mongrel with hepatic lymphosarcoma benefited from chemotherapy for 5 months before euthana…	Excluded
Asparaginase-associated pancreatitis in a dog	A dog with lymphosarcoma was evaluated for vomiting, lethargy, and abdominal pain 48 h after treatment with L-asparaginase. Based on drug administration, clinical signs, bloodwork, and elevated canine pancreatic lipase immunoreactivity, L-asparaginase-associated pancreatitis was diagnosed. This is an acknowledged toxicity; however, its pathophysiology and incidence rate in veterinary patients are…	Excluded
Linear osteochondromatosis in a cat	A domestic shorthair cat was presented with quadriparesis and lumbar hyperesthesia that progressed over 4 months. There were linear and amorphous radiopaque masses throughout the soft tissue surrounding the long bones, vertebral bodies, ribs, pelvis, and scapula. The diagnosis of osteochondromatosis was confirmed by histopathology. Unlike previously reported patients with osteochondromatosis, mos…	Excluded
The NMDA (N-methyl-D-aspartate) receptor antagonist memantine in the treatment of postherpetic neuralgia: a double-blind, placebo-controlled study	A double-blind, randomized, placebo-controlled trial was conducted to study the analgesic efficacy of the NMDA (N-methyl-D-aspartate) receptor antagonist memantine (1-amino-3,5-dimethyladamantane hydrochloride) in relieving postherpetic neuralgia (PHN). Memantine (or an identical-looking placebo; n = 12/group) was administered at a dose of 10 mg/day for one week, and 20 mg/day for an additional 4…	Excluded
Nitroprusside inhibits thermal hyperalgesia induced by noradrenaline in capsaicin-treated skin	A facilitatory effect of the sympathetic neurotransmitter noradrenaline on nociceptor discharge may sometimes contribute to pain and hyperalgesia in inflammatory and neuropathic pain syndromes. Our previous studies have shown that noradrenaline heightens sensitivity to heat in skin sensitized by the topical application of capsaicin, and that this effect persists during arterial occlusion (Drummon…	Excluded
First-in-Class, Dual-Action, 3,5-Disubstituted Indole Derivatives Having Human Nitric Oxide Synthase (nNOS) and Norepinephrine Reuptake Inhibitory (NERI) Activity for the Treatment of Neuropathic Pain	A family of different 3,5-disubstituted indole derivatives having 6-membered rings were designed, synthesized, and demonstrated inhibition of human nitric oxide synthase (NOS) with norepinephrine reuptake inhibitory activity (NERO. The structure-activity relationship (SAR) within the cyclohexane ring showed the cis-isomers to be more potent for neuronal NOS and selective over endothelial NOS comp…	Included
Distribution of sensory properties among axotomized cutaneous C-fibres in adult rats	A few hours after peripheral axons of cutaneous afferent neurons have been transected, some of their novel endings become excitable by physical or chemical stimuli.(1,78,12-14) It has been assumed that these axon endings preferentially respond to those stimuli which have excited their previous receptive endings. We studied the prevalence of sensory properties among 784 unmyelinated sural nerve fi…	Excluded
Nutrition and brain function: A multidisciplinary virtual symposium	A few months ago, the Brazilian Society for Neuroscience and Behavior (SBNeC) promoted a "virtual symposium" (by Internet, under the coordination of R.C.A. Guedes) on "Nutrition and Brain Function". The discussions generated during that symposium originated the present text, which analyzes current topics on the theme, based on the multidisciplinary experience of the authors. The way the brain cou…	Excluded
A field trial using praziquantel (BiltricideR) to treat Schistosoma mansoni and Schistosoma haematobium infection in Gezira, Sudan	A field trial was conducted in the Gezira, Sudan, to evaluate the acceptability and efficacy of praziquantel, a new schistosomicide. In one Arab village 350 patients with Schistosoma mansoni were randomly assigned to two treatment groups and given 1 X 40 mg kg-1 (Group A) or 2 X 20 mg kg-1 given four to six hours apart (Group B). In two small settlements (camps) 2 km distant from the Arab village…	Excluded
A nasal dermoid sinus in an English bull terrier	A five-year-old, entire female English bull terrier was presented with a six-week history of intermittent facial swelling and nasal pain, following an incident of nasal trauma. A small opening was present at the mucocutaneous junction on the dorsal nasal planum. Examination under general anaesthesia allowed catheterisation of this opening and confirmed the presence of a tract passing caudally. Pl…	Excluded
Effects of systemic, intracerebral, or intrathecal administration of an N-methyl-D-aspartate receptor antagonist on associative morphine analgesic tolerance and hyperalgesia in rats	A flavor paired with morphine shifted to the right the function relating morphine dose to tail-flick latencies and provoked hyperalgesic responses when rats were tested in the absence of morphine. These learned increases in nociceptive sensitivity were not mediated by alterations in tail-skin temperature. Microinjection of the competitive N-methyl-D-aspartate (NMDA) receptor antagonist D,L-2-amin…	Excluded
FUNGAL KERATITIS IN A GOPHER TORTOISE (GOPHERUS POLYPHEMUS)	A free-ranging gopher tortoise (Gopherus polyphemus) presented for trauma and blindness. Fibrinous exudate obscured visualization of the globes. This exudative crust extended from the conjunctival fornices through the palpebral fissure and was manually removed. Ophthalmic examination revealed bilateral corneal ulcerations and scarring and phthisis bulbi of the left globe. Histology of the crust r…	Excluded
Cloning of the gene encoding Leishmania donovani S-adenosylhomocysteine hydrolase, a potential target for antiparasitic chemotherapy	A full-length gene encoding the S-adenosylhomocysteine hydrolase (AdoHcyase) enzyme has been isolated from a genomic library of Leishmania donovani DNA in lambda GEM-11 by cross-hybridization to the full-length human AdoHcyase cDNA. The nucleotide sequence of the SalI fragment contained a single open reading frame that encoded a polypeptide of 438 amino acids (47,712 Da). After maximum gap alignm…	Excluded
Development of a fully automated on-line solid phase extraction and high-performance liquid chromatography with diode array detection method for the pharmacokinetic evaluation of bavachinin: A study on absolute bioavailability and dose proportionality	A fully automated on-line solid-phase extraction (SPE) and high-performance liquid chromatography (HPLC) with diode array detection (DAD) method was developed for determination of bavachinin in mouse plasma. Analytical process was performed on two reversed-phase columns (SPE cartridge and analytical column) connected via a Valco 6-port switching valve. Plasma samples (10 mu L) were injected direc…	Excluded
Reduced nitric oxide synthase and cyclo-oxygenase activity in the uterus of non-obese diabetic mice	A functional interaction between progesterone, Th2 cytokines and a suitable balance between nitric oxide and prostaglandins in the uterus is considered to have a major role in the success of embryo implantation and pregnancy. Non-obese diabetic (NOD) mice offer a suitable model to study the modulatory role of Th1 cytokines on uterus signalling and function, since at the prediabetic stage they dev…	Excluded
Gastrin-releasing peptide and pruritus: More than just scratching the surface	A gastrin-releasing peptide receptor mediates the itch sensation in the spinal cord. Sun YG, Chen ZF. Itching, or pruritus, is defined as an unpleasant cutaneous sensation that serves as a physiological self-protective mechanism to prevent the body from being hurt by harmful external agents. Chronic itch represents a significant clinical problem resulting from renal diseases and liver diseases, a…	Excluded
Pain modulation and the action of analgesic medications	A general approach to improving the treatment of patients with post-herpetic neuralgia is outlined. Pain-generating processes initiated by injury to peripheral nerve and new treatments that target these processes are discussed. Another described approach is to use knowledge of central nervous system pain-modulating networks to improve the effectiveness of centrally acting analgesics such as opioi…	Excluded
De-alcoholization of Paclitaxel Injection for Clinical Application	A generic drug of Taxol (R) Injection, Paclitaxel Injection NK (PTX injection), cannot be used for patients with severe hypersensitivity or overwhelming intolerance to alcohol because it contains ethanol as a dissolving agent. Therefore, we evaluated the suitability of de-alcoholized PTX injection for clinical application. De-alcoholization was carried out using inactive N2 gas under sterile cond…	Excluded
Botulinum toxin A does not alter capsaicin-induced pain perception in human skin	A genuine peripheral antinociceptive and anti-inflammatory effect of Botulinum neurotoxin type A (BoNT/A) has been proposed but could not be demonstrated in humans so far. Therefore, 100 mouse units of Botulinum toxin A (Dysport(R)) and placebo were injected in a double blind paradigm in defined skin areas of 50 subjects. At baseline and after 4 and 8 weeks allodynia was induced in the skin areas…	Excluded
Behavioral manifestations of an experimental model for peripheral neuropathy produced by spinal nerve ligation in the primate	A goal of the present study was to document the behavioral changes observed in a model of painful neuropathy in the primate (Macaca fascicularis). A neuropathic state was induced by tight ligation of the L7 spinal nerve, just distal to the L7 dorsal root ganglion. Sensory testing was done on the ventral surface of the foot, a region that includes the L7 dermatome. Within 1 week following surgery,…	Included
Improved electrochemical analysis of neuropathy target esterase activity by a tyrosinase carbon paste electrode modified by 1-methoxyphenazine methosulfate	A graphite-paste tyrosinase biosensor was improved by adding 1-methoxyphenazine methosulfate as a mediator. Mediator modification enhanced sensitivity to phenol 4-fold and long-term stability 3-fold. Phenol could be detected at 25 nM (S/N=2) using an Ag/AgCl reference electrode. The biosensor was used to measure the activity of a toxicologically significant enzyme, neuropathy target esterase (NTE…	Excluded
Plasticity of hyperpolarization-activated and cyclic nucleotid-gated cation channel subunit 2 expression in the spinal dorsal horn in inflammatory pain	A great deal of experimental evidence has already been accumulated that hyperpolarization-activated and cyclic nucleotide-gated cation channels (HCN) expressed by peripheral nerve fibers contribute to the initiation of nerve activities leading to pain. Complementing these findings, we have recently demonstrated that HCN subunit 2 (HCN2) channel protein is also widely expressed by axon terminals o…	Excluded
Yasargil-Phynox aneurysm clip: a simple and reliable device for making a peripheral nerve injury	A great number of devices were used to make a peripheral nerve injury. In the scientific literature, experimental crush injuries have been usually created using forceps or hemostatic forceps, neither of which allows quantitative or standard application of compression. Therefore, we used a Yasargil-Phynox aneurysm clip to make a reliable and standardized peripheral nerve injury. The advantages and…	Excluded
N-methyl-D-aspartate-enhanced analgesia	A greater understanding of the mechanisms that produce chronic pain states has led to a search for novel agents with the potential to produce analgesia by directly modulating specific processes involved in the transduction, transmission, modulation, perception, and encoding of pain. It is hoped that compounds directed at these specific targets will produce better analgesics with an improved side-…	Excluded
Safety trial using the Leishmune (R) vaccine against canine visceral leishmaniasis in Brazil	A group of 600 healthy and asymptomatic dogs from Brazilian canine visceral leishmaniasis endemic areas was vaccinated with three sc doses of Leishmune (R) which is the industrialized formulation of the FML-saponin, recently licensed for commercialization in Brazil, which previously showed 76-80% vaccine efficacy against canine visceral leishmaniasis. Safety evaluation was performed for 14 days a…	Excluded
Distal denervating disease: A degenerative neuropathy of the distal motor axon in dogs	A group of ten dogs affected by an apparently identical denervating disease, is described. There was no breed or age predisposition but females were preferentially affected (70%). The rate of onset of signs was variable from a week to greater than 1 month. Quadriparesis was present to varying severities and in two dogs the head and neck could not be supported. Mastication, swallowing, respiration…	Excluded
Pain and purinergic signaling	A growing body of evidence indicates that extracellular nucleotides play important roles in the regulation of neuronal and glial functions in the nervous system through P2 purinoceptors. P2 purinoceptors are divided into two families, ionotropic receptors (P2X) and metabotropic receptors (P2Y). P2X receptors (seven types; P2X1-P2X7) contain intrinsic pores that open by binding with ATP, and P2Y r…	Excluded
Behavioral phenotypes of mice lacking purinergic P2X(4) receptors in acute and chronic pain assays	A growing body of evidence indicates that P2X receptors (P2XRs), a family of ligand-gated cation channels activated by extracellular ATP, play an important role in pain signaling. In contrast to the role of the P2X(3)R subtype that has been extensively studied, the precise roles of others among the seven P2XR subtypes (P2X(1)R-P2X(7)R) remain to be determined because of a lack of sufficiently pow…	Excluded
TNFalpha and IL-1beta are mediated by both TLR4 and Nod1 pathways in the cultured HAPI cells stimulated by LPS	A growing body of evidence recently suggests that glial cell activation plays an important role in several neurodegenerative diseases and neuropathic pain. Microglia in the central nervous system express toll-like receptor 4 (TLR4) that is traditionally accepted as the primary receptor of lipopolysaccharide (LPS). LPS activates TLR4 signaling pathways to induce the production of proinflammatory m…	Excluded
Antihyperalgesic activity of epibatidine in the formalin model of facial pain	A growing body of evidence supports a nicotinic cholinergic approach to pain management, as neuronal nicotinic receptor agonists have shown efficacy across animal models of both inflammatory and neuropathic pain. However, most of these investigations have focused on the spinal system, and there is to date no report of nicotinic receptor-mediated antinociception in any pain model involving the tri…	Excluded
Mechanisms of Action for Acupuncture in the Oncology Setting	A growing body of literature supports the use of acupuncture in the oncology clinic for the relief of symptoms caused by cancer treatments. Several clinical trials are currently supported by the National Institutes of Health to assess the efficacy of such treatments, as evidenced by the listings in the National Institutes of Health Computer Retrieval of Information on Scientific Projects (CRISP) …	Excluded
BOTULINUM NEUROTOXIN TYPE A COUNTERACTS NEUROPATHIC PAIN AND FACILITATES FUNCTIONAL RECOVERY AFTER PERIPHERAL NERVE INJURY IN ANIMAL MODELS	A growing interest was recently focused on the use of Botulinum neurotoxin serotype A (BoNT/A) for fighting pain. The aim of this study was to investigate the effects of BoNT/A on neuropathic pain. It was observed that BoNT/A is able to counteract neuropathic pain induced by chronic constriction injury (CCI) to the sciatic nerve both in mice and in rats. This effect is already present after a sin…	Included
Ultra-low-level laser therapy	A growing number of laboratory and clinical studies over the past 10 years have shown that low-level laser stimulation (633 or 670 nm) at extremely low power densities (about 0.15 mW/cm<sup>2</sup>), when administered through a particular emission mode, is capable of eliciting significant biological effects. Studies on cell cultures and animal models as well as clinical trials give support to a n…	Excluded
Reverse genetics in neuropathic pain: From molecules in neurons and glia to genes	A growing number of potential molecular targets for the treatment of neuropathic pain have been identified by elucidating signaling pathways in neurons and glial cells that are critical for establishing or maintaining pain hypersensitivity following peripheral nerve injury (PNI). As the molecular targets identified in this way are typically proteins, the potential for altering pain hypersensitivi…	Excluded
Effect of a helium-neon laser on cutaneous inflammation	A Helium-Neon (He-Ne) laser with a wavelength of 632.8 nm is known to have photobiological effects and is widely used for reducing the pain of herpes zoster and accelerating wound healing, however the cellular mechanism and effect of the He-Ne laser are poorly understood. The present study was designed to examine the influence of He-Ne laser irradiation on irritant and allergic contact dermatitis…	Excluded
Orphanin FQ: a neuropeptide that activates an opioidlike G protein-coupled receptor	A heptadecapeptide was identified and purified from porcine brain tissue as a ligand for an orphan heterotrimeric GTP-binding protein (G protein)-coupled receptor (LC132) that is similar in sequence to opioid receptors. This peptide, orphanin FQ, has a primary structure reminiscent of that of opioid peptides. Nanomolar concentrations of orphanin FQ inhibited forskolin-stimulated adenylyl cyclase …	Excluded
Clonal analysis of T-cell responses to herpes simplex virus: isolation, characterization and antiviral properties of an antigen-specific helper T-cell clone	A herpes simplex virus (HSV)-specific long-term T-cell clone has been established from the draining lymph node cells of BALB/c mice; the cells required repeated in vitro restimulation with UV-irradiated virus. The established T-cell clone expresses the Thy-1 and Lyt-1+2,3- surface antigens. For optimal proliferation of the cloned cells, both the presence of specific antigen and an exogenous sourc…	Excluded
Co-administered gabapentin and venlafaxine in nerve injured rats: Effect on mechanical hypersensitivity, motor function and pharmacokinetics	A high proportion of patients suffering from neuropathic pain do not receive satisfactory pain relief from their current treatment, due to incomplete efficacy and dose-limiting adverse effects. Hence, one strategy to improve treatment outcome is the use of a combination of analgesic drugs. The potential benefits of such approach include improved and prolonged duration of analgesic effect and fewe…	Included
1,4-Diazepane compounds as potent and selective CB2 agonists: Optimization of metabolic stability	A high-throughput screening campaign has identified 1,4-diazepane compounds which are potent Cannabinoid receptor 2 agonists with excellent selectivity against the Cannabinoid receptor 1. This class of compounds suffered from low metabolic stability. Following various strategies, compounds with a good stability in liver microsomes and rat PK profile have been identified. (C) 2011 Elsevier Ltd. Al…	Excluded
Interaction of SIV/SHIV infection and morphine on plasma oxidant/antioxidant balance in macaque	A homeostatic balance exists between the cellular generation of oxidant species and endogenous antioxidants under normal physiological conditions. Human Immunodeficiency Virus (HIV) infection is known to affect this balance causing oxidative stress. However, the interaction of HIV infection with a substance abuse on cellular oxidant/antioxidant system is sparse. This study was designed in order t…	Excluded
Retrospective prevalence of snakebites from Hospital Kuala Lumpur (HKL) (1999-2003)	A hospital based retrospective study of the prevalence of snakebite cases at Hospital Kuala Lumpur was carried out over a five-year period from 1999 to 2003. A total of 126 snakebite cases were recorded. The highest admission for snakebites was recorded in 2001 (29 cases). The majority of cases were admitted for three days or less (79%). Most of the snakebite cases were reported in the 11-30 year…	Excluded
A HUMAN CASE OF STELLANTCHASMUS-FALCATUS INFECTION	A human case of infection with Stellantchasmus falcatus (Heterophyidae) is reported based on adult worms collected after praziquantel treatment. The patient is a 33-year old male residing in Seoul [Korea]. For several months he experienced vague abdominal discomfort and hunger pain. Praziquantel at a single dose of 600 mg was given followed by purgation with magnesium salt, and 17 adult S. falcat…	Excluded
Targeting activated lymphocytes with an entirely human immunotoxin analogue: human pancreatic RNase1-human IL-2 fusion	A hybrid human protein was produced in E. coli by fusing the genes encoding human pancreatic RNase1 (hpRNase1) and human IL-2 (hIL-2). The recombinant hpRNase1-hIL-2 inhibited protein synthesis in HTLV-1-infected, malignant T cells, which hyperproduce high affinity IL-2 receptors, with an IC(50)of 2x10(-8) M, whereas no inhibition was detectable in control cells with lower affinity receptors. HpR…	Excluded
Oxytocin actions on afferent evoked spinal cord neuronal activities in neuropathic but not in normal rats	A hypothalamic oxytocinergic-descending pathway that reaches the dorsal horn of the spinal cord has been well documented and recently related to states of pain and analgesia. In order to study the action of the neuropeptide oxytocin (OT) on pain-related responses, we compared dorsal horn neuronal responses to electrical and mechanical stimulation of receptive fields in normal and neuropathic rats…	Included
A hypothesis on the physiological basis for causalgia and related pains	A hypothesis is presented concerning the neuronal mechanisms which subserve the sympathetically maintained pains such as causalgia and reflex sympathetic dystrophy. The hypothesis rests on two assumptions: (1) that a high rate of firing in spinal wide-dynamic-range (WDR) or multireceptive neurons results in painful sensations; and (2) that nociceptor responses associated with trauma can produce l…	Excluded
Hypothesis on reciprocal interactions between the central and peripheral components of the endogenous opioid system	A hypothesis on reciprocal interactions between the central and peripheral components of the endogenous opioid system was formulated on the basis of results of our experimental studies and published data. In order to verify this hypothesis, we studied the effects of peripheral administration of loperamide (mu-opioid receptor agonist) and methylnaloxone (opioid receptor antagonist) not penetrating…	Excluded
Neuregulin-ErbB Signaling Promotes Microglial Proliferation and Chemotaxis Contributing to Microgliosis and Pain after Peripheral Nerve Injury	A key component in the response of the nervous system to injury is the proliferation and switch to a "proinflammatory" phenotype by microglia (microgliosis). In situations where the blood-brain barrier is intact, microglial numbers increase via the proliferation and chemotaxis of resident microglia; however, there is limited knowledge regarding the factors mediating this response. After periphera…	Included
[Neuroprotection by ketamine at the cellular level]	A key question in cellular neuroprotection is how pharmacologic agents may protect neurons when applied after injury in clinically relevant concentrations. Of special importance is the N-methyl-D-aspartate (NMDA) antagonist ketamine, which offers the potential for regulation of intracellular calcium levels and pathophysiological NO induction by blocking excessive NMDA-receptor stimulation. This m…	Excluded
The effect of glutamate antibodies on the memory of rats with experimental ischemic damage to the prefrontal cortex	A key role in the mechanisms of acute neurodegenerative brain damage is played by intensified production of the exciting neurotransmitter glutamate, which possesses excitotoxicity that leads to the death of neurons involved in the integrative activity of the brain associated with learning and memory. It is known that the immune system responds with antibodies production to any disruption in the f…	Excluded
Osteochondroma causing progressive posterior paresis in a lakeland terrier puppy	A lakeland terrier puppy had progressive hindlimb ataxia associated with pain in the thoracic spine. Plain radiographs revealed a lesion affecting the dorsal neural arch of the fourth thoracic vertebra and myelography revealed compression of the spinal cord associated with the lesion. Surgical excision of the mass cured the dog's clinical signs. A histopathological examination of the excised tiss…	Excluded
TNF-alpha contributes to up-regulation of Nav1.3 and Nav1.8 in DRG neurons following motor fiber injury	A large body of evidence has demonstrated that the ectopic discharges of action potentials in primary afferents, resulted from the abnormal expression of voltage gated sodium channels (VGSCs) in dorsal root ganglion (DRG) neurons following peripheral nerve injury are important for the development of neuropathic pain. However, how nerve injury affects the expression of VGSCs is largely unknown. He…	Excluded
CNGA3: A Target of Spinal Nitric Oxide/cGMP Signaling and Modulator of Inflammatory Pain Hypersensitivity	A large body of evidence indicates that nitric oxide (NO) and cGMP contribute to central sensitization of pain pathways during inflammatory pain. Here, we investigated the distribution of cyclic nucleotide-gated (CNG) channels in the spinal cord, and identified the CNG channel subunit CNGA3 as a putative cGMP target in nociceptive processing. In situ hybridization revealed that CNGA3 is localized…	Excluded
CNGA3: A target of spinal NO/cGMP signaling and modulator of inflammatory pain hypersensitivity	A large body of evidence indicates that nitric oxide (NO) and cyclic guanosine monophosphate (cGMP) contribute to central sensitization of pain pathways during inflammatory pain. Here, we investigated the distribution of cyclic nucleotide-gated (CNG) channels in the spinal cord, and identified the CNG channel subunit CNGA3 as putative cGMP target in nociceptive processing. CNGA3 expression is upr…	Excluded
No NO, no pain? The role of nitric oxide and cGMP in spinal pain processing	A large body of evidence indicates that nitric oxide (NO) and cyclic guanosine monophosphate (cGMP) essentially contribute to the processing of nociceptive signals in the spinal cord. Many animal studies have unanimously shown that inhibition of NO or cGMP synthesis can considerably reduce both inflammatory and neuropathic pain. However, experiments with NO donors and cGMP analogs also caused con…	Excluded
Single doses of the serotonin agonists buspirone and m-chlorophenylpiperazine do not relieve neuropathic pain	A large body of evidence links serotonin with analgesia in animal models, but the lack of serotonin agonists suitable for clinical use has delayed study of serotonin's relevance to pain relief in humans. In a randomized, double-blind crossover study, we compared single doses of two 5-HT<sub>1</sub> agonists, buspirone and m-chlorophenylpiperazine, to placebo in 20 patients with post-herpetic neur…	Excluded
The role of delta-opioid receptor subtypes in neuropathic pain	A large body of evidence suggests an important role of delta -opioid receptor agonists in antinociception at the level of the spinal cord. Our study was undertaken to analyse the spinal antinociceptive and antiallodynic effects of delta (1)- and delta (2)-opioid receptor agonists and antagonist after their acute and chronic intrathecal administration in a neuropathic pain model in the rat. In rat…	Included
COUPLING GENE CHIP ANALYSES AND RAT GENETIC VARIANCES IN IDENTIFYING POTENTIAL TARGET GENES THAT MAY CONTRIBUTE TO NEUROPATHIC PAIN DEVELOPMENT	A large body of evidence suggests that altered gene expression in sensory neurons may contribute to long-term plasticity after peripheral nerve injury that may lead to neuropathic pain. We have shown previously that genetic factors may play a role in nerve injury-induced hypersensitivity to mechanical stimulation (allodynia). To confirm rat strain-dependent variations in neuropathic pain suscepti…	Included
Mice lacking central serotonergic neurons show enhanced inflammatory pain and an impaired analgesic response to antidepressant drugs	A large body of literature has implicated serotonin [5-hydroxytryptamine (5-HT)] in descending modulation of nociceptive transmission. Here, we have studied the pain behavior of Lmx1b conditional knock-out mice (Lmx1b(f/f/p) p), which lack 5-HT neurons in the CNS. Lmx1b(f/f/p)/ p mutant mice showed normal thermal and visceral pain responses but were less sensitive to mechanical stimuli and exhibi…	Excluded
Cannabinoid mechanisms of pain suppression	A large body of literature indicates that cannabinoids suppress behavioral responses to acute and persistent noxious stimulation in animals. This review examines neuroanatomical, behavioral, and neurophysiological evidence supporting a role for cannabinoids in suppressing pain at spinal, supraspinal, and peripheral levels. Localization studies employing receptor binding and quantitative autoradio…	Excluded
Spinal and peripheral mechanisms of cannabinoid antinociception: behavioral, neurophysiological and neuroanatomical perspectives	A large body of literature indicates that cannabinoids suppress behavioral responses to acute and persistent noxious stimulation. This review examines behavioral, neurophysiological and neuroanatomical evidence supporting a role for cannabinoids in suppressing nociceptive transmission at spinal and peripheral levels. The development of subtype-selective competitive antagonists and high-affinity a…	Excluded
Pharmacological treatments for chronic non-malignant pain	A large body of research now supports the use of traditional psychiatric treatments in the management of chronic pain. Pharmacological treatments have proven effective for many different pain syndromes, especially neuropathic conditions. For any specific disease, no single algorithm can dictate the modalities of treatment to be prescribed. Several classes of medications have proven efficacy for t…	Excluded
Tumour vascular disrupting agents: Combating treatment resistance	A large group of tubulin-binding microtubule-depolymerizing agents act as tumour vascular disrupting agents (VDAs). Several members of this group are now in clinical trials in combination with conventional anticancer drugs and radiotherapy. Here we briefly update on the development of tubulin-binding combretastatins as VDAs, summarize what is known of their mechanisms of action and address issues…	Excluded
Effects of Exogenous Galanin on Neuropathic Pain State and Change of Galanin and Its Receptors in DRG and SDH after Sciatic Nerve-Pinch Injury in Rat	A large number of neuroanatomical, neurophysiologic, and neurochemical mechanisms are thought to contribute to the development and maintenance of neuropathic pain. However, mechanisms responsible for neuropathic pain have not been completely delineated. It has been demonstrated that neuropeptide galanin (Gal) is upregulated after injury in the dorsal root ganglion (DRG) and spinal dorsal horn (SD…	Included
Duloxetine in neuropathic pain. [Spanish]	A large number of patients suffer chronic pain, having a remarkable reduction of their quality of life. A high amount of medical and social resources are spent in these patients. Neuropathic pain is one of the most complex syndromes we can see everyday, often we do not achieve pain relief, and many patients do not respond to a conventional analgesic treatment. Antidepressants drugs are widely use…	Excluded
Selective Sigma-1 (sigma(1)) Receptor Antagonists: Emerging Target for the Treatment of Neuropathic Pain	A large number of therapeutic roles have been proposed for sigma(1) receptors but the involvement of sigma(1) receptor in non-acute pain had not been well explored up to now. sigma(1) receptor knock-out mice became available offering us the possibility to study the role of sigma(1) receptor in nociception, particularly in models where central sensitization processes play a significant role. Given…	Excluded
Cold exposure enhances tactile allodynia transiently in mononeuropathic rats	A laser and erythrosin-B-induced sciatic nerve injury decreases thresholds of a mechanically induced paw withdrawal reflex and enhances cold-induced withdrawal behavior of the affected limb. Exposure of the affected paw to a normally innocuous cold stimulus results in a transient decrease in the threshold of the mechanically evoked paw withdrawal reflex in neuropathic but not in intact rats. The …	Included
Inflammatory mediators enhance the excitability of chronically compressed dorsal root ganglion neurons	A laterally herniated disk, spinal stenosis, and various degenerative or traumatic diseases of the spine can sometimes lead to a chronic compression and inflammation of the dorsal root ganglion and chronic abnormal sensations including pain. After a chronic compression of the dorsal root ganglion (CCD) in rats, the somata in the dorsal root ganglion (DRG) become hyperexcitable, and some exhibit e…	Excluded
Off-label use of lincomycin hydrochloride in two horses: Inadequate symptomatic treatment resulting resulting in dysbacteriosis and fatal complications	A lawyer inquired about the possible harmful effects of 'off-label use' of lincomycin in two trotting horses. From information in the relevant dossier it could be concluded that there was no direct indication to use antibiotics. In addition, mistakes were made in the medicinal treatment of horses, namely, the off-label use of lincomycin without prior consultation with the manufacturer, fluid and …	Excluded
2-nitrophenylcarbamoyl-(S)-prolyl-(S)-3-(2-naphthyl)alanyl-N-benzyl-N-me thylamide (SDZ NKT 343), a potent human NK1 tachykinin receptor antagonist with good oral analgesic activity in chronic pain models	A lead compound which had sub-micromolar affinity for the rabbit NK1 receptor but negligible affinity for rat NK1 receptors, 3a, was discovered by directed screening. 2-Substitution in the ring of the benzylthiourea substituent in the initial lead was found to be important, and halogens (Cl, Br) in this position were found to improve affinity for the human receptor. The activity of a series of 2-…	Excluded
Novel sulfamoyl benzamides as selective CB2 agonists with improved in vitro metabolic stability	A lead optimization campaign in our previously reported sulfamoyl benzamide class of CB2 agonists was conducted to improve the in vitro metabolic stability pro. le in this series while retaining high potency and selectivity for the CB2 receptor. From this study, compound 14, N-(3,4-dimethyl-5-(morpholinosulfonyl)phenyl)-2,2-dimethylbutanamide, was identified as a potent and selective CB2 agonist …	Excluded
Patterns of FOS expression in the spinal cord and periaqueductal grey matter of 6OHDA-lesioned rats	A less well-known feature of Parkinson disease is that up to 40% of patients experience distinct sensory disturbances, including hyperalgesia and chronic pain. There is a limited understanding of the neural mechanisms that generate these symptoms, however. This study explores the patterns of Fos expression (a well-known marker for changes in cell activity) in the spinal cord and periaqueductal gr…	Excluded
Conditioned Place Preference Reveals Tonic Pain in an Animal Model of Central Pain	A limitation of animal models of central pain is their inability to recapitulate all clinical characteristics of the human condition. Specifically, many animal models rely on reflexive measures of hypersensitivity and ignore, or cannot assess, spontaneous pain, the hallmark characteristic of central pain in humans. Here, we adopt a conditioned place preference paradigm to test if animals with les…	Included
A paracrine paradigm for in vivo gene therapy in the central nervous system: treatment of chronic pain	A limitation of current gene therapy efforts aimed at central nervous system disorders concerns distribution of vectors on direct injection into neural tissue. Here we have circumvented this problem by transferring genes to the meninges surrounding the spinal cord, achieving an in vivo gene transfer paradigm for treating chronic pain. The therapeutic vector consisted of a recombinant adenovirus e…	Excluded
The adenosine analog, 5'-N-ethylcarboxamidoadenosine, exerts mixed agonist action on cardiorespiratory parameters in the intact but not decerebrate rat following microinjections into the nucleus tractus solitarius	A limited occipital craniotomy was conducted on intact and decerebrate urethane-anesthetized, spontaneously breathing rats to expose the caudal medulla in the region of the obex. Microinjections of 5'-N-ethylcarboxamidoadenosine (NECA), a metabolically stable adenosine analog which exhibits mixed agonist properties for adenosine receptor subtypes, were made into the medial region of the caudal nu…	Excluded
Sensory thresholds and the antinociceptive effects of GABA receptor agonists in mice lacking the beta(3) subunit of the GABA(A) receptor	A line of mice was recently created in which the gabrb3 gene, which encodes the beta(3) subunit of the GABA(A) receptor, was inactivated by gene-targeting. The existence of mice with a significantly reduced population of GABA(A) receptors in the CNS enabled an investigation of the role of GABA and GABA(A) receptors in nociception. The present study examined the sensory thresholds of these mice, a…	Excluded
The nervous system and metabolic dysregulation: Emerging evidence converges on ketogenic diet therapy	A link between metabolism and brain function is clear. Since ancient times, epileptic seizures were noted as treatable with fasting, and historical observations of the therapeutic benefits of fasting on epilepsy were confirmed nearly 100 years ago. Shortly thereafter a high fat, low-carbohydrate ketogenic diet (KD) debuted as a therapy to reduce seizures. This strict regimen could mimic the metab…	Excluded
Additional toxins for feral pig (Sus scrofa) control: identifying and testing Achilles' heels	A literature review was conducted in order to identify unique weaknesses in the physiology or metabolism of pigs that could be targeted with specific chemicals (i.e. an 'Achilles' heel' search). A promising weakness identified was the species' susceptibility to methaemoglobin-forming compounds, most likely related to their uniquely low levels of methaemoglobin reductase. Further examination revea…	Excluded
Change in the expression of c-fos in the rat brain following sciatic nerve ligation	A little or none is known about the direct evidence for the possible change in the expression of c-fos at the supraspinal level after nerve injury. Therefore, the present study was designed to investigate the level of c-fos in some brain regions following sciatic nerve ligation in the rat. Immunoblot analysis clearly showed that the levels of c-fos in the rat frontal cortex, thalamus and periaque…	Included
Local nitric oxide synthase activity in a model of neuropathic pain	A local inflammatory reaction may play an important role in the development of neuropathic pain following peripheral nerve injury. One important participant in the inflammatory response of injured peripheral nerve may be nitric oxide (NO). In this work, we examined physiological and morphological evidence for nitric oxide synthase (NOS) activation in the chronic constriction injury model of neuro…	Included
The vagal afferents discharge and myoelectrical activity in the gastric hyperalgesia model in rats	A long term exposure of the gastric mucosa to inflammatory factors is suspected to alter the normal stomach motility. The consequence of it is an abnormal sensomotor response to food causing dyspeptic symptoms. Our study aimed to investigate the vagal afferents activity and the gastro-duodenal slow wave response to the mild gastric mucosa inflammation in rats. The gastric mucosal inflammation was…	Excluded
Intrathecal clonidine decreases spinal nitric oxide release in a rat model of complete Freund's adjuvant induced inflammatory pain	A long-lasting antihyperalgesic effect has been demonstrated for intrathecal (IT) clonidine, an alpha2-adrenergic agonist. In the present study, the mechanism and antihyperalgesic effects of IT clonidine were examined post-treatment in a rat model of Complete Freund's Adjuvant (CFA)-induced inflammatory hyperalgesia. Using a chronic model of spinal cord dialysis, we examined the effect of the adj…	Excluded
Ajulemic acid: A novel cannabinoid produces analgesia without a "high"	A long-standing goal in cannabinoid research has been the discovery of potent synthetic analogs of the natural substances that might be developed as clinically useful drugs. This requires, among other things, that they be free of the psychotropic effects that characterize the recreational use of Cannabis. An important driving force for this goal is the long history of the use of Cannabis as a med…	Excluded
An in vitro model for long-term hepatotoxicity testing utilizing rat hepatocytes entrapped in micro-hollow fiber reactor	A long-term hepatocyte model in vitro is preferable for chronic hepatotoxicity research because hepatocytes in this model of culture can preserve liver-specific functions for long period. Micro-hollow fiber reactors (MHFR), composed of polysulphone (PS) hollow fibers with a molecular weight cut-off 100 kDa, were applied to test the hepatotoxicity of acetaminophen, isoniazid and rifampicin, respec…	Excluded
The young man with the lung cavity	A lung cavity is a gas containing space within the lung surrounded by a wall whose thickness is greater than 1 mm. It is generally a result of pulmonary tissue necrosis. A 30-year-old white male presented with right superior pleuritic chest pain, dyspnea, hemoptysis and night sweats for 10 days. He denied fevers, chills, recent travel, chest trauma, sick contacts, previous similar symptoms, aspir…	Excluded
Partial restoration of mutant enzyme homeostasis in three distinct lysosomal storage disease cell lines by altering calcium homeostasis	A lysosomal storage disease (LSD) results from deficient lysosomal enzyme activity, thus the substrate of the mutant enzyme accumulates in the lysosome, leading to pathology. In many but not all LSDs, the clinically most important mutations compromise the cellular folding of the enzyme, subjecting it to endoplasmic reticulum-associated degradation instead of proper folding and lysosomal trafficki…	Excluded
Prevention and control of influenza. Role of vaccine	A major component in the prevention and control of influenza should be the use of killed influenza vaccines. These vaccines became possible after the first discovery of human strains of influenza virus in the 1930s. The ensuing decades have seen marked improvement in the available inactivated vaccines. Current vaccines have excellent reliability and assured potency, and they contain the proper an…	Excluded
Prediction of human absorption of natural compounds by the non-everted rat intestinal sac model	A major concern in natural drug research is that many substances with potent biological activity in vitro are unable to generate good activity in vivo owing to their poor water-solubility, poor permeability and/or poor stability. The permeability of drug candidates across the intestinal mucosa is one of the most important factors in defining drug bioavailability and biological activity. In order …	Excluded
Present models of neuropathic pain	A major contribution to our understanding of acute and chronic central and peripheral pain syndromes, as well as proper pain relief and management, results directly from animal models. These models create neuroma formation, inflammatory processes, traumatic nerve injuries, disease states, viscus- related pain or pain syndromes following central nervous system stroke. The power of these models res…	Excluded
Alcohol consumption enhances antiretroviral painful peripheral neuropathy by mitochondrial mechanisms	A major dose-limiting side effect of human immunodeficiency virus/acquired immunodeficiency syndrome (HIV/AIDS) chemotherapies, such as the nucleoside reverse transcriptase inhibitors (NRTIs), is a small-fiber painful peripheral neuropathy, mediated by its mitochondrial toxicity. Co-morbid conditions may also contribute to this dose-limiting effect of HIV/AIDS treatment. Alcohol abuse, which alon…	Included
Identifying pain genes: Bottom-up and top-down approaches	A major goal of pain research at the present time is the identification of pain genes. Such genes have been informally defined in a number of ways, including the deletion or transcriptional inhibition of which produces alterations in behavioral responses on nociceptive assays; those the transcription of which is selective to pain-relevant anatomic loci (eg, small-diameter cells of the dorsal root…	Excluded
High molecular weight hyaluronic acid limits astrocyte activation and scar formation after spinal cord injury	A major hurdle for regeneration after spinal cord injury (SCI) is the ability of axons to penetrate and grow through the scar tissue. After SCI, inflammatory cells, astrocytes and meningeal cells all play a role in developing the glial scar. In addition, degradation of native high molecular weight (MW) hyaluronic acid (HA), a component of the extracellular matrix, has been shown to induce activat…	Excluded
History of the synthesis and pharmacology of isosorbide dinitrate	A major research program in the University of Maryland School of Medicine, Department of Pharmacology, in the 1930s was the preparation of a large number of sugar alcohols and their anhydrides as substitute carbohydrates for diabetic diets. As an outgrowth of this work, many of these polyols were converted to their nitrate esters and investigated for their vasodilating properties. The organic nit…	Excluded
CISPLATIN-INDUCED NEUROPATHY IN MATURE RATS - EFFECTS OF THE MELANOCORTIN-DERIVED PEPTIDE ORG-2766	A major side effect of cisplatin treatment is peripheral neuropathy. In the past few years we have provided evidence that the ACTH4-9 analogue ORG 2766 provides protection against this neuropathy in rats and man. In this study we investigated the development of a cisplatin-induced neuropathy and the protective and therapeutic actions of ORG 2766 in mature rats. We also studied the effects of the …	Excluded
Oral pregabalin reverses cold allodynia in two distinct models of peripheral neuropathic pain	A major symptom of persistent neuropathic pain, which may develop after peripheral nerve injury, is hypersensitivity (allodynia) to normally innocuous cold stimuli. Although the anticonvulsant pregabalin has been demonstrated to relieve neuropathic pain. both in preclinical models and clinically, the analgesic effect of the drug in animals has not been profiled for cold hypersensitivity. Therefor…	Included
Neurotrophin - 3 reverses chronic tactile hyperalgesia caused by intramuscular acid injection	A majority of muscle afferents are responsive to neurotrophin-3 (NT-3), leading to the possibility that NT-3 may have neuroprotective actions in response to damage to muscle afferents. We have utilized a neuropathic model that mimics the pathophysiology of muscle-induced pain to address possible neuroprotective actions of NT-3. In this model, repeated injection of acidic saline into the gastrocne…	Excluded
Exceptionally high titres in atypical presentation of occult epididymo-orchitis due to brucellosis	A male patient of 32 years was referred for surgical drainage and orchidectomy of the right testis following a cycling injury. A Venereal Disease Research Laboratory (VDRL) test was requested by the surgery department to rule out secondary syphilis. Although serum samples gave a negative result in the VDRL test, qualitative screening was performed for Brucella antibodies, as per hospital policy, …	Excluded
CH'IU. Hyper-sensitivity to streptomycin in the treatment of tuberculosis	A male, age 29, with advanced bilateral pulmonary tuberculosis and ulcerative laryngeal tuberculosis, developed reaction symptoms after streptomycin, such as fever, chilliness, headache, dizziness, ringing in the ears, general malaise, local pain at the sites of injn., and eosinophilia. The symptoms could be relieved promptly by discontinuation or by changing the injn. from intramusc. to subcut. …	Excluded
Herpetic meningo-encephalitis	A man, aged 48, who, within a few days, developed a herpetic eruption and severe pain along the course of the supraorbital branch of the 5th nerve, dizziness, vomiting and an elevated temperature, died twenty days later in an irrational state complicated by urinary retention. Microscopic studies of the brain and spinal cord revealed a non-purulent meningitis of both the convexity and base of the …	Excluded
Multiple myeloma in a German Shepherd Dog	A massive hypergammaglobulinemia was detected in a nine year old German Shepherd Dog. Further examination revealed a thrombocytopenia, prolonged coagulation times and splenomegaly. A biclonal IgA- and IgG gammopathy was demonstrated in the serum and in the urine by means of serum- and SDS-PAG-electrophoresis with subsequent Western- and immunoblotting. There were no radiographically detectable bo…	Excluded
[Studies of inflammatory pain response: related pain producing substance and endogenous opioid system]	A method for assessing inflammatory pain response was developed by modification of the formalin test. Formalin (0.5%, 25 microliters) was injected into the hindpaw of the mouse, and the durations spent in licking or biting response were measured as an indicator of pain response. The response curve was biphasic, having two peaks, from 0 to 5 min (first phase) and from 15 to 20 min (second phase). …	Excluded
An improved method for assessing mechanical allodynia in the rat	A method has been developed for assessing mechanical nociceptive threshold and allodynia in the rat. The animal was habituated to stand on its hind paws while leaning against an experimenter's hand. The rat was unrestrained, but remained in the position throughout the test session. The Semmes-Weinstein monofilaments were used to probe body areas such as the lateral edge of the hind paw and the or…	Excluded
Non-specific factors in resistance V. Carbon dioxide tolerance	A method is descr. for judging functional efficiency (through observation of the respiratory response to inhaled 5% CO2) which gives indications of correlated resistive efficiency consistent with (he record for subsequently observed incidence of common cold. The resting subject is connected with an apparatus recording the rate and depth of breathing. Rest is continued until the ventilation per mi…	Excluded
Analgesic activity of diflunisal [MK-647; 5-(2,4-difluorophenyl)salicylic acid] in rats with hyperalgesia induced by Freund's adjuvant	A method is described for testing analgesia for narcotic or nonnarcotic drugs in rats injected with Freund's adjuvant in the tail, by manipulation of the tail the day after injection, or of the feet after the development of adjuvant arthritis. The method is responsive to a behavioral depressant or an anti-inflammatory steroid. Diflunisal (MK-647; 5-(2,4-difluorophenyl)salicylic acid] exhibited ac…	Excluded
Relative refractory period as a measure of peripheral nerve neurotoxicity	A method is presented for converting the relative refractory period to a linear form which can be used for quantifying changes in peripheral nerve conduction and membane excitability. Since the relative refractory period is very consistent in nerves taken from animals of a given age, strain, and size, small alterations due to exposure by neurotoxic agents can readily be detected. In the present s…	Excluded
A new and sensitive method for measuring thermal nociception in cutaneous hyperalgesia	A method to measure cutaneous hyperalgesia to thermal stimulation in unrestrained animals is described. The testing paradigm uses an automated detection of the behavioral end-point; repeated testing does not contribute to the development of the observed hyperalgesia. Carrageenan-induced inflammation resulted in significantly shorter paw withdrawal latencies as compared to saline-treated paws and …	Excluded
Primary splenic hydatid cyst: A case report with characteristic imaging appearance	A middle-aged lady presented with pain, tenderness and swelling in the left hypochondrium since one month. She had a history of contact with dogs and grazing animals. Sonography and computed tomography showed the pathognomonic signs of hydatid disease. The patient refused surgical treatment. She was discharged on Albendazole therapy and did not return for a follow up.	Excluded
[truncated: 28,436 more rows]
